# Supplementary material
Source: PubMed Central journal article supplement (PMC2920594)
Supplement: NIHMS213300-supplement-1_si_001.pdf [file NIHMS213300-supplement-1_si_001.pdf]

# Chrysophaentins A-H, Antibacterial Bisdiarylbutene Macrocycles that Inhibit the Bacterial Cell Division Protein FtsZ

*Alberto Plaza,<sup>†</sup> Jessica L. Keffer,<sup>†</sup> Giuseppe Bifulco,<sup>‡</sup> John R. Lloyd,<sup>†</sup> and Carole A. Bewley<sup>†\*</sup>*

<sup>†</sup>Laboratory of Bioorganic Chemistry, National Institute of Diabetes and Digestive and Kidney Diseases, National Institutes of Health, Bethesda, Maryland 20892, <sup>‡</sup>Dipartimento di Scienze Farmaceutiche, University of Salerno, Via Ponte Don Melillo, 84084 Fisciano, Salerno, Italy.

Email [caroleb@mail.nih.gov](mailto:caroleb@mail.nih.gov)

## TABLE OF CONTENTS

|                                                                                                                                  |       |
|----------------------------------------------------------------------------------------------------------------------------------|-------|
| Complete References 9e and 19                                                                                                    | S3    |
| General Experimental                                                                                                             | S3-S4 |
| Table S1. <sup>1</sup> H and <sup>13</sup> C NMR Data for Compound <b>1a</b> (MeOH- <i>d</i> <sub>4</sub> )                      | S4    |
| Table S2. <sup>1</sup> H and <sup>13</sup> C NMR Data for Compounds <b>2-4</b> (MeOH- <i>d</i> <sub>4</sub> )                    | S6    |
| Table S3. Spectroscopic NMR Data for Chrysophaentin F ( <b>6</b> ) (MeOH- <i>d</i> <sub>4</sub> and DMF- <i>d</i> <sub>7</sub> ) | S8    |
| Table S4. <sup>1</sup> H and <sup>13</sup> C NMR Data for Compounds <b>7</b> and <b>8</b> (MeOH- <i>d</i> <sub>4</sub> )         | S9    |
| <sup>1</sup> H NMR spectrum of chrysophentins A ( <b>1</b> ) in MeOD- <i>d</i> <sub>4</sub>                                      | S11   |
| <sup>13</sup> C NMR spectrum of chrysophentins A ( <b>1</b> ) in MeOD- <i>d</i> <sub>4</sub>                                     | S12   |
| HSQC spectrum of chrysophentins A ( <b>1</b> ) in MeOD- <i>d</i> <sub>4</sub>                                                    | S13   |
| HMBC spectrum of chrysophentins A ( <b>1</b> ) in MeOD- <i>d</i> <sub>4</sub>                                                    | S14   |
| DQF-COSY spectrum of chrysophentins A ( <b>1</b> ) in MeOD- <i>d</i> <sub>4</sub>                                                | S15   |

|                                                                                              |     |
|----------------------------------------------------------------------------------------------|-----|
| ROESY spectrum of chrysophentin A ( <b>1</b> ) in MeOD- <i>d</i> <sub>4</sub>                | S16 |
| <sup>1</sup> H NMR spectrum of chrysophentin A ( <b>1</b> ) in in DMF- <i>d</i> <sub>7</sub> | S17 |
| HSQC spectrum of chrysophentin A ( <b>1</b> ) in DMF- <i>d</i> <sub>7</sub>                  | S18 |
| HMBC spectrum of chrysophentin A ( <b>1</b> ) in DMF- <i>d</i> <sub>7</sub>                  | S19 |
| ROESY spectrum of chrysophentin A ( <b>1</b> ) in DMF- <i>d</i> <sub>7</sub>                 | S20 |
| <sup>1</sup> H NMR spectrum of chrysophentin B ( <b>2</b> ) in MeOD- <i>d</i> <sub>4</sub>   | S21 |
| HSQC spectrum of chrysophentin B ( <b>2</b> ) in MeOD- <i>d</i> <sub>4</sub>                 | S22 |
| <sup>1</sup> H NMR spectrum of chrysophentin C ( <b>3</b> ) in MeOD- <i>d</i> <sub>4</sub>   | S23 |
| HSQC spectrum of chrysophentin C ( <b>3</b> ) in MeOD- <i>d</i> <sub>4</sub>                 | S24 |
| HMBC spectrum of chrysophentin C ( <b>3</b> ) in MeOD- <i>d</i> <sub>4</sub>                 | S25 |
| <sup>1</sup> H NMR spectrum of chrysophentin D ( <b>4</b> ) in MeOD- <i>d</i> <sub>4</sub>   | S26 |
| HSQC spectrum of chrysophentin D ( <b>4</b> ) in MeOD- <i>d</i> <sub>4</sub>                 | S27 |
| HMBC spectrum of chrysophentin D ( <b>4</b> ) in MeOD- <i>d</i> <sub>4</sub>                 | S28 |
| <sup>1</sup> H NMR spectrum of chrysophentin E ( <b>5</b> ) in MeOD- <i>d</i> <sub>4</sub>   | S29 |
| HSQC spectrum of chrysophentin E ( <b>5</b> ) in MeOD- <i>d</i> <sub>4</sub>                 | S30 |
| HMBC spectrum of chrysophentin E ( <b>5</b> ) in MeOD- <i>d</i> <sub>4</sub>                 | S31 |
| ROESY spectrum of chrysophentin E ( <b>5</b> ) in MeOD- <i>d</i> <sub>4</sub>                | S32 |
| <sup>1</sup> H NMR spectrum of chrysophentin E ( <b>5</b> ) in DMF- <i>d</i> <sub>7</sub>    | S33 |
| HSQC spectrum of chrysophentin E ( <b>5</b> ) in DMF- <i>d</i> <sub>7</sub>                  | S34 |
| HMBC spectrum of chrysophentin E ( <b>5</b> ) in DMF- <i>d</i> <sub>7</sub>                  | S35 |
| ROESY spectrum of chrysophentin E ( <b>5</b> ) in DMF- <i>d</i> <sub>7</sub>                 | S36 |
| <sup>1</sup> H NMR spectrum of chrysophentin F ( <b>6</b> ) in MeOD- <i>d</i> <sub>4</sub>   | S37 |
| HSQC spectrum of chrysophentin F ( <b>6</b> ) in MeOD- <i>d</i> <sub>4</sub>                 | S38 |
| HMBC spectrum of chrysophentin F ( <b>6</b> ) in MeOD- <i>d</i> <sub>4</sub>                 | S39 |
| ROESY spectrum of chrysophentin F ( <b>6</b> ) in MeOD- <i>d</i> <sub>4</sub>                | S40 |
| <sup>1</sup> H NMR spectrum of chrysophentin F ( <b>6</b> ) in DMF- <i>d</i> <sub>7</sub>    | S41 |
| HSQC spectrum of chrysophentin F ( <b>6</b> ) in DMF- <i>d</i> <sub>7</sub>                  | S42 |
| HMBC spectrum of chrysophentin F ( <b>6</b> ) in DMF- <i>d</i> <sub>7</sub>                  | S43 |
| <sup>1</sup> H NMR spectrum of chrysophentin G ( <b>7</b> ) in MeOD- <i>d</i> <sub>4</sub>   | S44 |

|                                                                                                                                                    |     |
|----------------------------------------------------------------------------------------------------------------------------------------------------|-----|
| HSQC spectrum of chrysophentin G ( <b>7</b> ) in MeOD- <i>d</i> <sub>4</sub>                                                                       | S45 |
| HMBC spectrum of chrysophentin G ( <b>7</b> ) in MeOD- <i>d</i> <sub>4</sub>                                                                       | S46 |
| <sup>1</sup> H NMR spectrum of chrysophentin H ( <b>8</b> ) in MeOD- <i>d</i> <sub>4</sub>                                                         | S47 |
| HSQC spectrum of chrysophentin H ( <b>8</b> ) in MeOD- <i>d</i> <sub>4</sub>                                                                       | S48 |
| HMBC spectrum of chrysophentin H ( <b>8</b> ) in MeOD- <i>d</i> <sub>4</sub>                                                                       | S49 |
| <sup>1</sup> H NMR Spectrum of chrysophentin A:FtsZ (100:1) in<br>NMR Buffer: 20 mM NaPO <sub>4</sub> , 50 mM NaCl, 5mM MgCl <sub>2</sub> , pH 6.8 | S50 |
| STD NMR Difference Spectrum of chrysophentin A:FtsZ (100:1) in NMR Buffer                                                                          | S51 |
| Tubulin polymerization assay                                                                                                                       | S52 |

**Complete Ref. 9e:** Haydon, D. J.; Stokes, N. R.; Ure, R.; Galbraith, G.; Bennet, J. M.; Brown, D. R. Baker, P. J.; Barniyin, V. V.; Rice, D. W.; Sedelnikova, S. E.; Heal, J. R.; Sheridan, J. M.; Aiwale, S. T.; Chauhan, P. K.; Srivastava, A.; Taneja, A.; Collins, I.; Errington, J.; Czaplewski, L. G. *Science* **2008**, *321*, 1673.

**Complete Ref. 19:** Czaplewski, L. G.; Collins, I.; Boyd, E. A.; Brown, D.; East, S. P.; Gardiner, M.; Fletcher, R.; Haydon, D. J.; Henstock, V.; Ingram, P.; Jones, C.; Noula, C.; Kennison, L.; Rockley, C.; Rose, V.; Thomaidis-Brears, H. B.; Ure, R.; Whittaker, M.; Stokes, N. R. *Bioorg. Med. Chem. Lett.* **2009**, *19*, 524.

## General Experimental

Optical rotations were measured with a Jasco P-2000 polarimeter, IR spectra were recorded on a Perkin Elmer FT-IR Spectrum One spectrometer, and UV spectra were recorded on an Agilent 8453 spectrophotometer. The accurate mass electrospray ionization (ESI) mass spectra were measured on a Waters LCT Premier time-of-flight (TOF) mass spectrometer. The instrument was operated in  $\omega$ -mode at a nominal resolution of 10,000 and all data was recorded in the negative ion mode. The electrospray capillary voltage was set at 2 KV and the sample cone voltage at 30 V. The desolvation temperature was

set to 275 °C and nitrogen was used as the desolvation gas with a flow rate of 300 L/h. Accurate masses were obtained using the internal reference standard method. In-source fragmentation was induced by increasing the cone voltage to 125 V.

**Table S1.**  $^1\text{H}$  and  $^{13}\text{C}$  NMR Data for Compound **1a** (MeOH- $d_4$ ).

| <b>1a</b> |                       |                                         |
|-----------|-----------------------|-----------------------------------------|
| position  | $\delta_{\text{C}}^a$ | $\delta_{\text{H}}^b$ ( <i>J</i> in Hz) |
| 1         | 151.9                 |                                         |
| 2         | 120.6                 |                                         |
| 3         | 125.1                 | 7.21 s                                  |
| 4         | 145.5                 |                                         |
| OAc-4     | 20.7                  | 2.32 s                                  |
| 5         | 132.5                 |                                         |
| 6         | 117.6                 | 6.48 s                                  |
| 7         | 28.8                  | 3.28 <sup>c</sup>                       |
| 8         | 127.4                 | 5.92 t (8.2)                            |
| 9         | 135.3                 |                                         |
| 10        | 33.4                  | 3.71, 3.45 br s                         |
| 11        | 133.8                 |                                         |
| 12        | 121.3                 | 6.95 <sup>c</sup>                       |
| 13        | 148.6                 |                                         |
| OAc-13    | 20.7                  | 2.27                                    |
| 14        | 118.1                 | 6.96 <sup>c</sup>                       |
| 15        | 143.7                 |                                         |
| OAc-15    | 20.2                  | 1.91                                    |
| 16        | 143.7                 |                                         |

---

|          |       |                   |
|----------|-------|-------------------|
| 1'       | 152.6 |                   |
| 2'       | 122.0 |                   |
| 3'       | 125.8 | 7.34 s            |
| 4'       | 145.1 |                   |
| OAc-4'   | 20.6  | 2.37              |
| 5'       | 134.4 |                   |
| 6'       | 117.7 | 6.50 s            |
| 7'       | 29.1  | 3.28 <sup>c</sup> |
| 8'       | 127.5 | 6.04 t (8.4)      |
| 9'       | 136.4 |                   |
| 10'      | 39.9  | 3.63 br s         |
| 11'      | 136.7 |                   |
| 12', 16' | N.O.  | N.O.              |
| 13', 15' | N.O.  |                   |
| OAc-13', | 20.1  | 2.04 br s         |
| OAc-15'  |       |                   |
| 14'      | N.O.  |                   |

---

<sup>a</sup>Recorded at 125 MHz; referenced to residual CD<sub>3</sub>OD at  $\delta$  49.15 ppm.

<sup>b</sup>Recorded at 500 MHz; referenced to residual CD<sub>3</sub>OD at  $\delta$  3.31 ppm.

**Table S2.** <sup>1</sup>H and <sup>13</sup>C NMR Data for Compounds **2-4** (MeOH-*d*<sub>4</sub>).

| Position | <b>2</b>     |                        | <b>3</b>     |                        | <b>4</b>     |                        |
|----------|--------------|------------------------|--------------|------------------------|--------------|------------------------|
|          | $\delta_C^a$ | $\delta_H^b$ (J in Hz) | $\delta_C^a$ | $\delta_H^b$ (J in Hz) | $\delta_C^a$ | $\delta_H^b$ (J in Hz) |
| 1        | 148.0        |                        | 149.2        |                        | 149.0        |                        |
| 2        | 120.0        |                        | 108.2        |                        | 108.1        |                        |
| 3        | 117.1        | 6.81 s                 | 119.7        | 6.99 s                 | 119.9        | 6.97 s                 |
| 4        | 150.3        |                        | 150.6        |                        | 150.5        |                        |
| 5        | 126.8        |                        | 127.3        |                        | 127.2        |                        |
| 6        | 115.9        | 6.17 s                 | 115.9        | 6.16 s                 | 115.9        | 6.16 s                 |
| 7        | 30.6         | 3.22 d (8.7)           | 30.7         | 3.22 d (8.7)           | 30.6         | 3.22 d (8.7)           |
| 8        | 127.6        | 5.99 t (8.7)           | 127.5        | 5.99 t (8.7)           | 127.5        | 6.00 t (8.7)           |
| 9        | 134.4        |                        | 134.4        |                        | 134.4        |                        |
| 10       | 33.5         | 3.39 br s              | 33.6         | 3.39 br s              | 33.6         | 3.39 br s              |
| 11       | 133.0        |                        | 133.0        |                        | 132.8        |                        |
| 12       | 107.8        | 6.18 d (2.8)           | 107.7        | 6.18 d (2.8)           | 107.9        | 6.17 d (2.8)           |
| 13       | 155.6        |                        | 155.6        |                        | 155.4        |                        |
| 14       | 103.8        | 6.30 d (2.8)           | 103.8        | 6.30 d (2.8)           | 103.7        | 6.30 d (2.8)           |
| 15       | 151.3        |                        | 151.2        |                        | 151.1        |                        |
| 16       | 135.9        |                        | 135.8        |                        | 135.7        |                        |
| 1'       | 149.5        |                        | 148.7        |                        | 149.5        |                        |
| 2'       | 109.3        |                        | 121.0        |                        | 109.3        |                        |
| 3'       | 120.0        | 7.00 s                 | 117.2        | 6.84 s                 | 119.9        | 7.00 s                 |
| 4'       | 150.8        |                        | 150.6        |                        | 150.8        |                        |
| 5'       | 127.6        |                        | 127.1        |                        | 127.7        |                        |

|          |       |                 |       |                    |       |                    |
|----------|-------|-----------------|-------|--------------------|-------|--------------------|
| 6'       | 116.3 | 6.25 s          | 116.4 | 6.27 s             | 116.2 | 6.25 s             |
| 7'       | 30.4  | 3.28 br d (8.1) | 30.4  | 3.28 br d<br>(8.1) | 30.4  | 3.28 br d<br>(8.1) |
| 8'       | 127.6 | 6.06 t (8.1)    | 127.6 | 6.06 t (8.1)       | 127.7 | 6.05 t (8.1)       |
| 9'       | 134.2 |                 | 134.2 |                    | 134.1 |                    |
| 10'      | 40.5  | 3.57 br s       | 40.5  | 3.57 br s          | 40.4  | 3.57 br s          |
| 11'      | 136.7 |                 | 136.3 |                    | 136.3 |                    |
| 12', 16' | 108.9 | 6.16 br s       | 108.8 | 6.16 br s          | 108.9 | 6.16 br s          |
| 13', 15' | 151.8 |                 | 151.8 |                    | 151.6 |                    |
| 14'      | 129.7 |                 | 129.7 |                    | 129.7 |                    |

<sup>a</sup> Recorded at 125 MHz; referenced to residual MeOH-*d*<sub>4</sub> at  $\delta$  49.1. <sup>b</sup> Recorded at 500 MHz; referenced to residual MeOH-*d*<sub>4</sub> at  $\delta$  3.30.

**Table S3.** Spectroscopic NMR Data for Chrysphaentin F (**6**) in MeOH-*d*<sub>4</sub> and DMF-*d*<sub>7</sub>

| Position         | <b>6</b> (MeOH- <i>d</i> <sub>4</sub> ) |                                |                                  |                    | <b>6</b> (DMF- <i>d</i> <sub>7</sub> ) |                                |                       |
|------------------|-----------------------------------------|--------------------------------|----------------------------------|--------------------|----------------------------------------|--------------------------------|-----------------------|
|                  | $\delta_C^a$                            | $\delta_H^b$ ( <i>J</i> in Hz) | HMBC <sup>c</sup>                | ROESY <sup>d</sup> | $\delta_C^e$                           | $\delta_H^f$ ( <i>J</i> in Hz) | HMBC <sup>c</sup>     |
| 1, 1'            | 148.2                                   |                                |                                  |                    | 147.0                                  |                                |                       |
| 2, 2'            | 120.4                                   |                                |                                  |                    | 119.0                                  |                                |                       |
| 3, 3'            | 117.3                                   | 6.90 s                         | 1, 2, 4, 5, 6, 7                 |                    | 116.4                                  | 7.06 s                         | 1, 2, 4, 5            |
| 4, 4'            | 150.7                                   |                                |                                  |                    | 150.1                                  |                                |                       |
| OH-4, OH-4'      |                                         |                                |                                  |                    |                                        | 9.98 s                         | 3, 4, 5               |
| 5, 5'            | 126.5                                   |                                |                                  |                    | 125.9                                  |                                |                       |
| 6, 6'            | 115.1                                   | 6.42 s                         | 1, 2, 3, 4, 5, 7                 | 7, 8, 12           | 114.3                                  | 6.55                           | 1, 2, 4, 7            |
| 7, 7'            | 31.0                                    | 3.35 d (8.3)                   | 4, 5, 6, 8, 9                    | 10                 | 30.3                                   | 3.43 d (8.5)                   | 4, 5, 8, 9            |
| 8, 8'            | 127.2                                   | 5.89 t (8.3)                   | 5, 7, 9, 10, 11                  | 7                  | 126.7                                  | 6.00 t (8.5)                   | 9                     |
| 9, 9'            | 134.3                                   |                                |                                  |                    | 133.2                                  |                                |                       |
| 10, 10'          | 39.8                                    | 3.54 br s                      | 8, 9, 11, 12, 16                 | 7, 12              | 38.9                                   | 3.65 br s                      | 8, 9, 11, 12          |
| 11, 11'          | 137.0                                   |                                |                                  |                    | 135.9                                  |                                |                       |
| 12, 16, 12', 16' | 110.0                                   | 6.23 s                         | 9, 10, 11, 12, 13,<br>14, 15, 16 | 6, 10              | 108.6                                  | 6.34 s                         | 10, 11, 12, 13,<br>14 |
| 13, 15, 13', 15' | 151.3                                   |                                |                                  |                    | 151.1                                  |                                |                       |
| OH-13, OH-15     |                                         |                                |                                  |                    |                                        | 9.79                           | NO                    |
| OH-13', OH-15'   |                                         |                                |                                  |                    |                                        |                                |                       |
| 14, 14'          | 130.0                                   |                                |                                  |                    | 128.8                                  |                                |                       |

<sup>a</sup> Recorded at 125 MHz; referenced to residual MeOH-*d*<sub>4</sub> at  $\delta$  49.1. <sup>b</sup> Recorded at 500 MHz; referenced to residual MeOH-*d*<sub>4</sub> at  $\delta$  3.30. <sup>c</sup> Proton showing HMBC correlation to indicated carbon. <sup>d</sup> Proton showing ROESY correlation to indicated carbon. <sup>e</sup> Recorded at 125 MHz; referenced to residual DMF-*d*<sub>7</sub> at  $\delta$  34.89. <sup>f</sup> Recorded at 500 MHz; referenced to residual DMF-*d*<sub>7</sub> at  $\delta$  2.92.



**Table S4.**  $^1\text{H}$  and  $^{13}\text{C}$  NMR Data for Compounds **7** and **8** ( $\text{MeOH-}d_4$ )

| Position | <b>7</b>              |                                         | <b>8</b>              |                                         |
|----------|-----------------------|-----------------------------------------|-----------------------|-----------------------------------------|
|          | $\delta_{\text{C}}^a$ | $\delta_{\text{H}}^b$ ( <i>J</i> in Hz) | $\delta_{\text{C}}^a$ | $\delta_{\text{H}}^b$ ( <i>J</i> in Hz) |
| 1        | 148.1                 |                                         | 147.7                 |                                         |
| 2        | 120.3                 |                                         | 120.5                 |                                         |
| 3        | 117.3                 | 6.90 s                                  | 117.3                 | 6.91 s                                  |
| 4        | 150.7                 |                                         | 151.0                 |                                         |
| 5        | 126.6                 |                                         | 126.8                 |                                         |
| 6        | 115.1                 | 6.42 s                                  | 115.1                 | 6.41 s                                  |
| 7        | 31.1                  | 3.35 d (8.0)                            | 30.9                  | 3.35 d (8.1)                            |
| 8        | 127.2                 | 5.89 t (8.0)                            | 126.8                 | 5.97 t (8.1)                            |
| 9        | 134.3                 |                                         | 134.4                 |                                         |
| 10       | 39.6                  | 3.54 s                                  | 39.9                  | 3.53 br s                               |
| 11       | 137.0                 |                                         | 137.1                 |                                         |
| 12, 16   | 110.1                 | 6.22 s                                  | 130.1                 | 6.21 s                                  |
| 13, 15   | 151.8                 |                                         | 151.1                 |                                         |
| 14       | 130.2                 |                                         | 130.0                 |                                         |
| 1'       | 149.3                 |                                         | 148.1                 |                                         |
| 2'       | 108.9                 |                                         | 120.3                 |                                         |
| 3'       | 120.3                 | 7.06 s                                  | 117.3                 | 6.90 s                                  |
| 4'       | 151.0                 |                                         | 150.7                 |                                         |
| 5'       | 127.3                 |                                         | 126.5                 |                                         |
| 6'       | 115.1                 | 6.41 s                                  | 115.1                 | 6.40 s                                  |
| 7'       | 31.1                  | 3.34 d (8.0)                            | 30.6                  | 3.35 d (8.2)                            |

|     |        |              |       |              |
|-----|--------|--------------|-------|--------------|
| 8'  | 127.2  | 5.89 t (8.0) | 127.8 | 5.89 t (8.2) |
| 9'  | 134.3  |              | 133.5 |              |
| 10' | 39.6   | 3.54 s       | 38.6  | 3.89 br s    |
| 11' | 137.0  |              | 135.8 |              |
| 12' | 110.05 | 6.23 s       | 106.3 |              |
| 13' | 151.2  |              | 146.1 |              |
| 14' | 130.0  |              | 130.7 |              |
| 15' | 151.2  |              | 150.0 |              |
| 16' | 110.0  | 6.23         | 109.1 | 6.22 s       |

<sup>a</sup> Recorded at 125 MHz; referenced to residual MeOH-*d*<sub>4</sub> at  $\delta$  49.1. <sup>b</sup> Recorded at 500 MHz; referenced to residual MeOH-*d*<sub>4</sub> at  $\delta$  3.30.

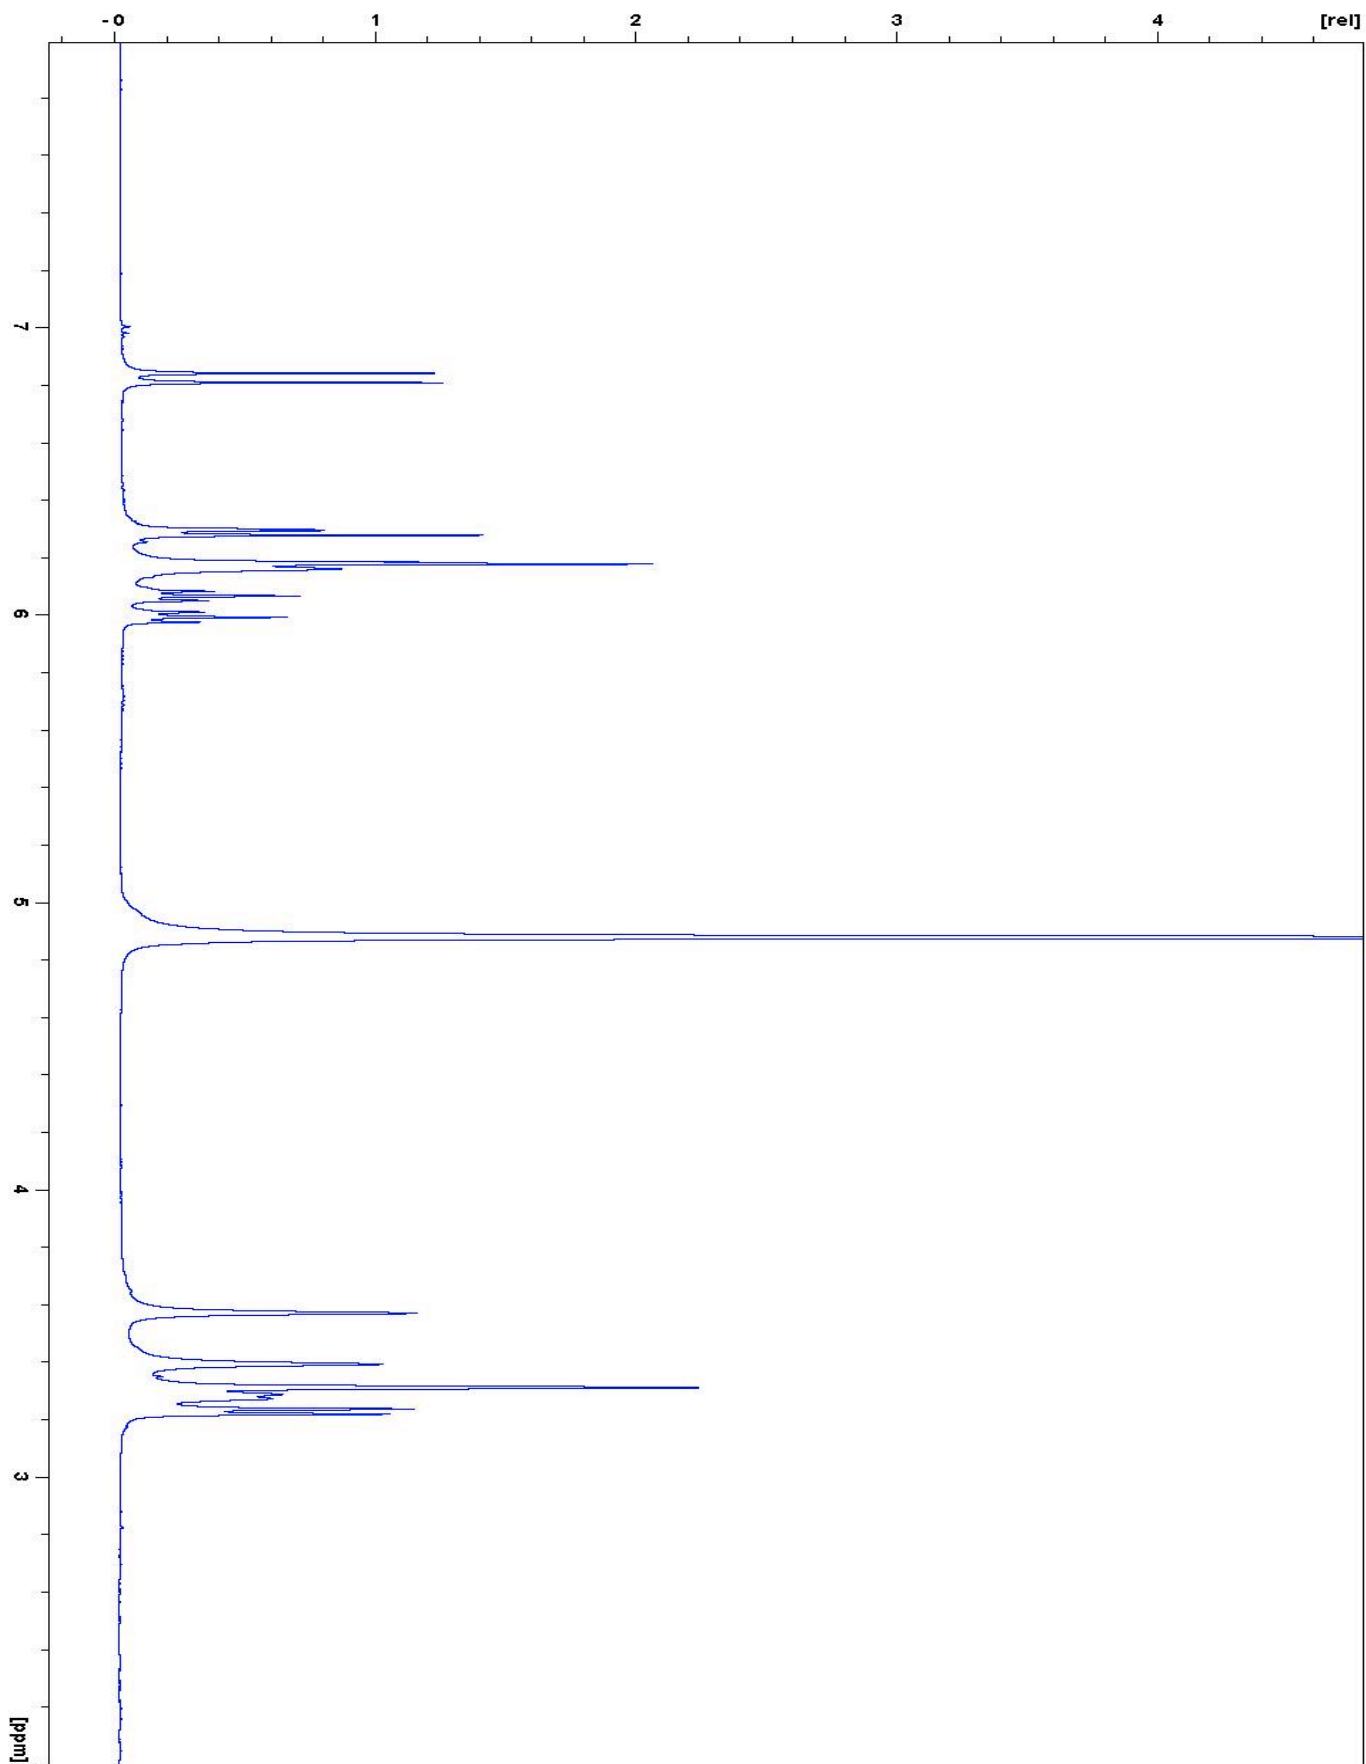

$^1\text{H}$  NMR spectrum of chrysophentin A (**1**) in  $\text{MeOD-}d_4$

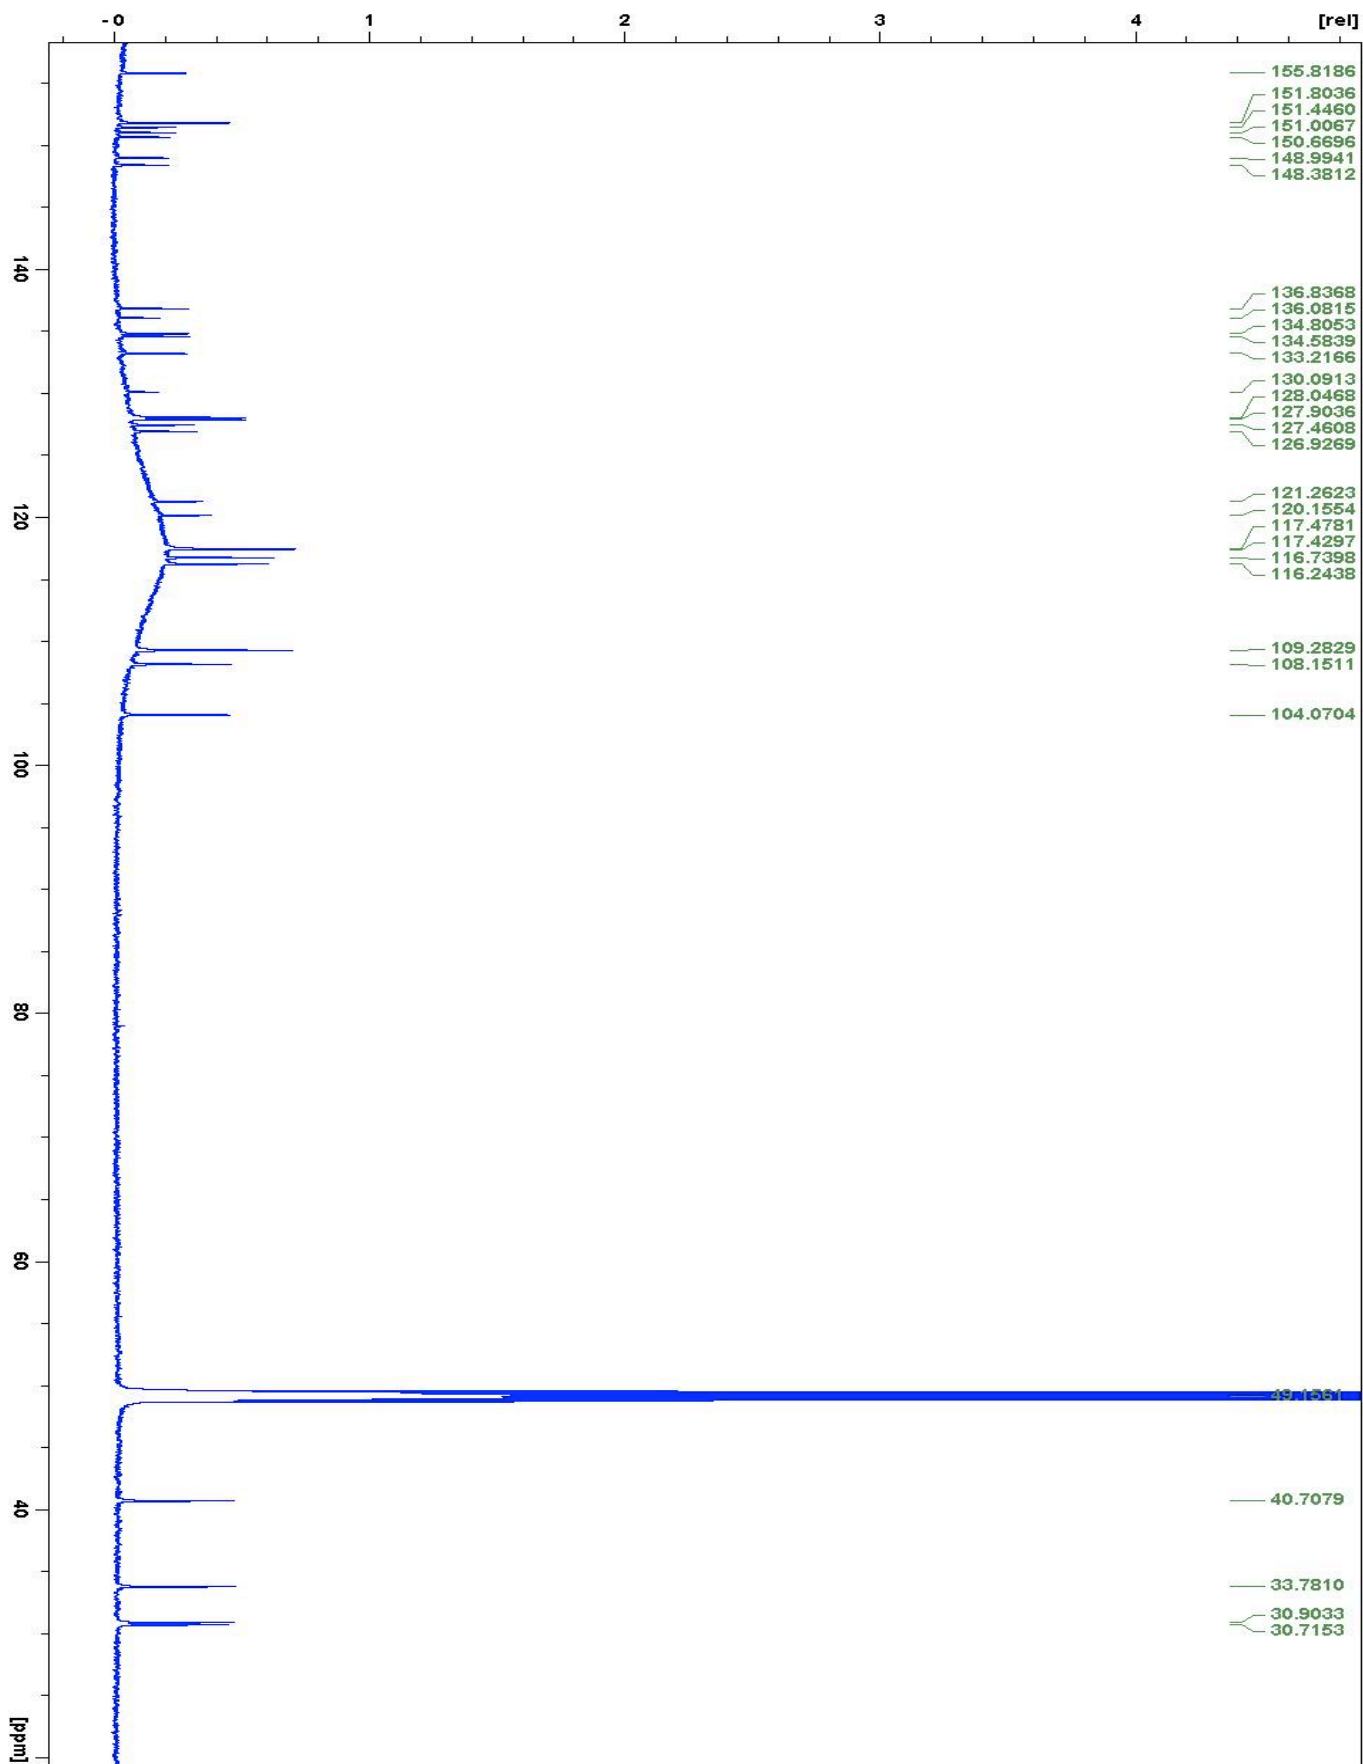

<sup>13</sup>C NMR spectrum of chrysophentin A (**1**) in MeOD-*d*<sub>4</sub>

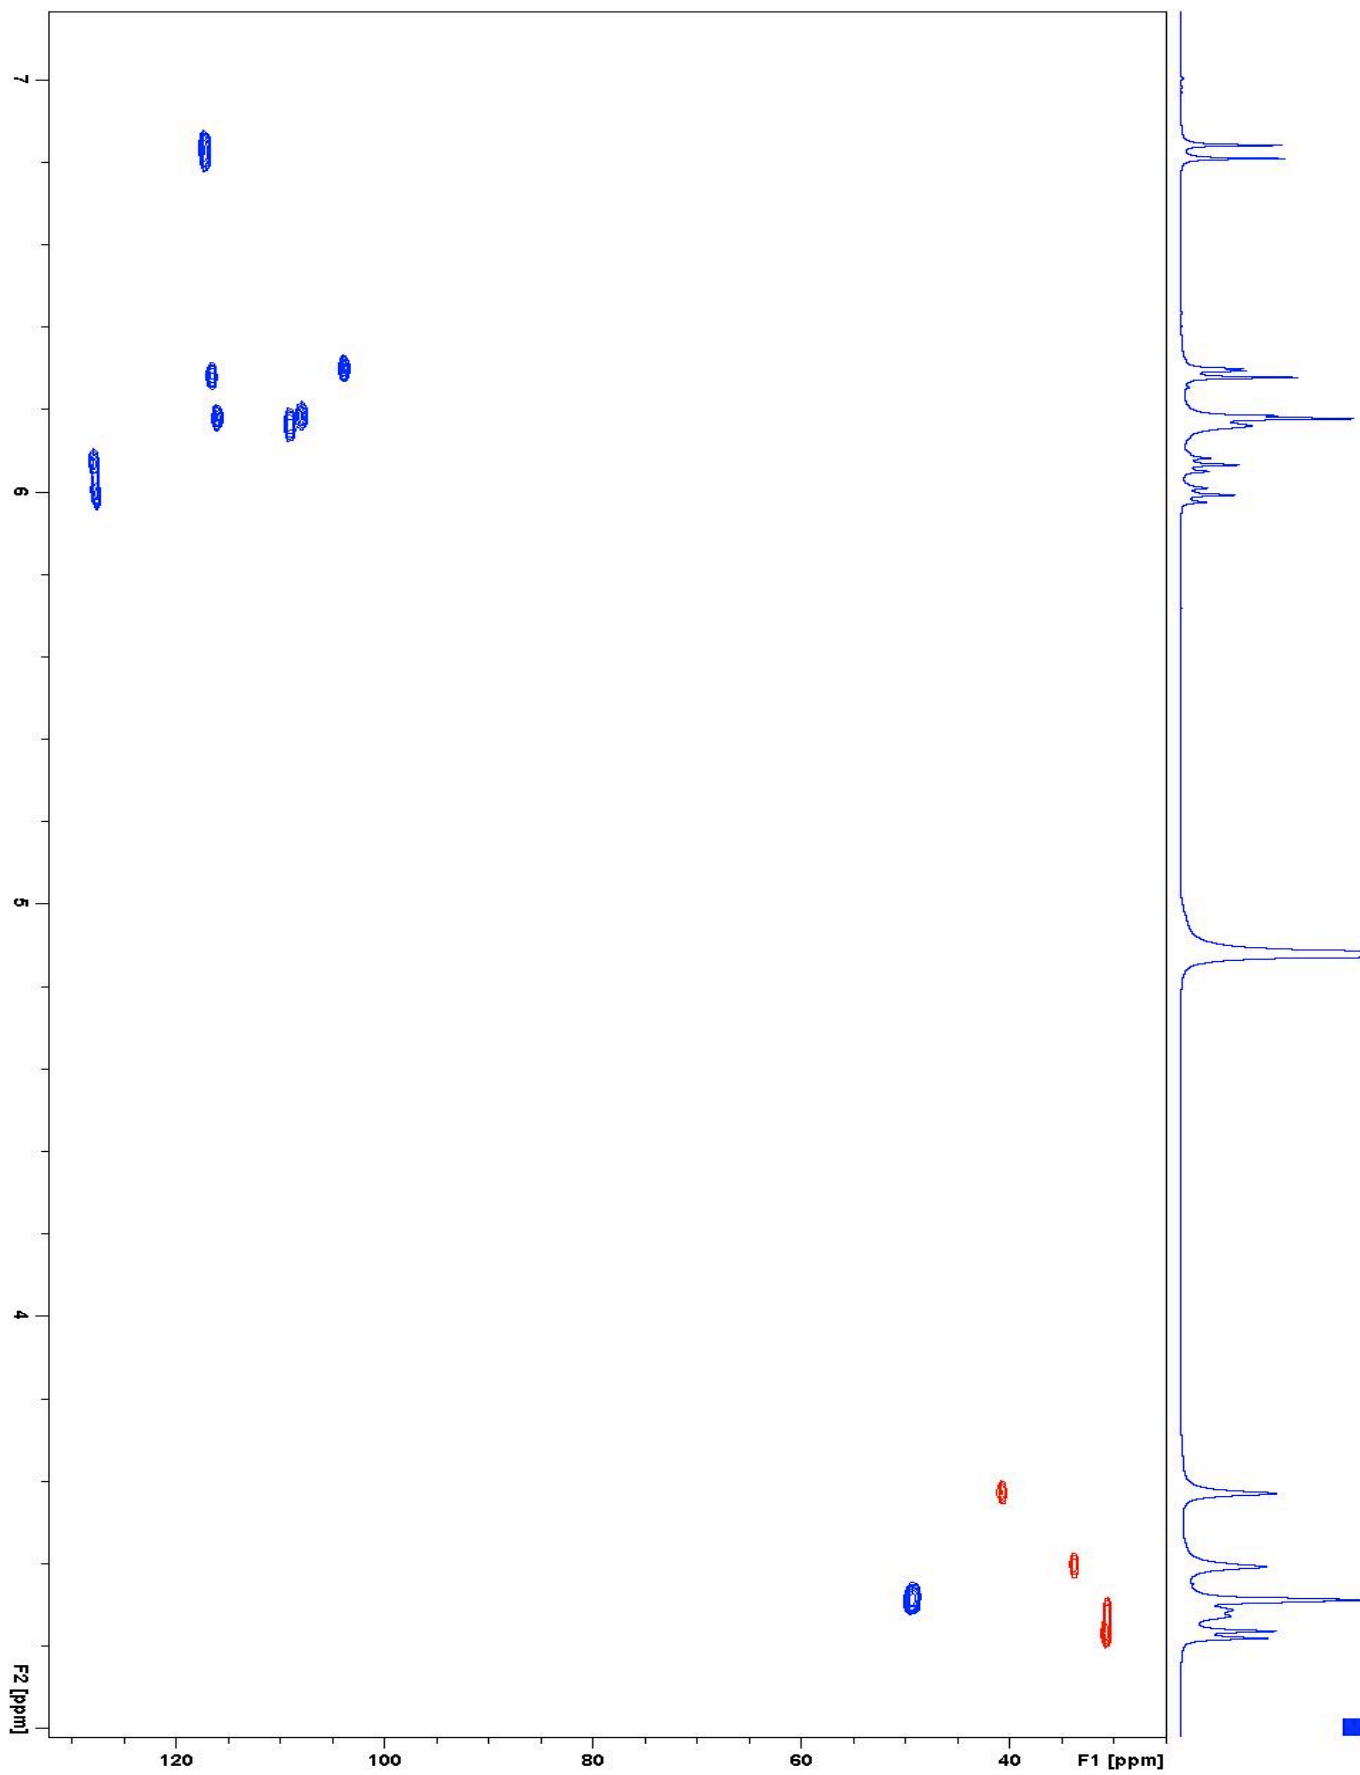

HSQC spectrum of chrysophentin A (**1**) in MeOD-*d*<sub>4</sub>

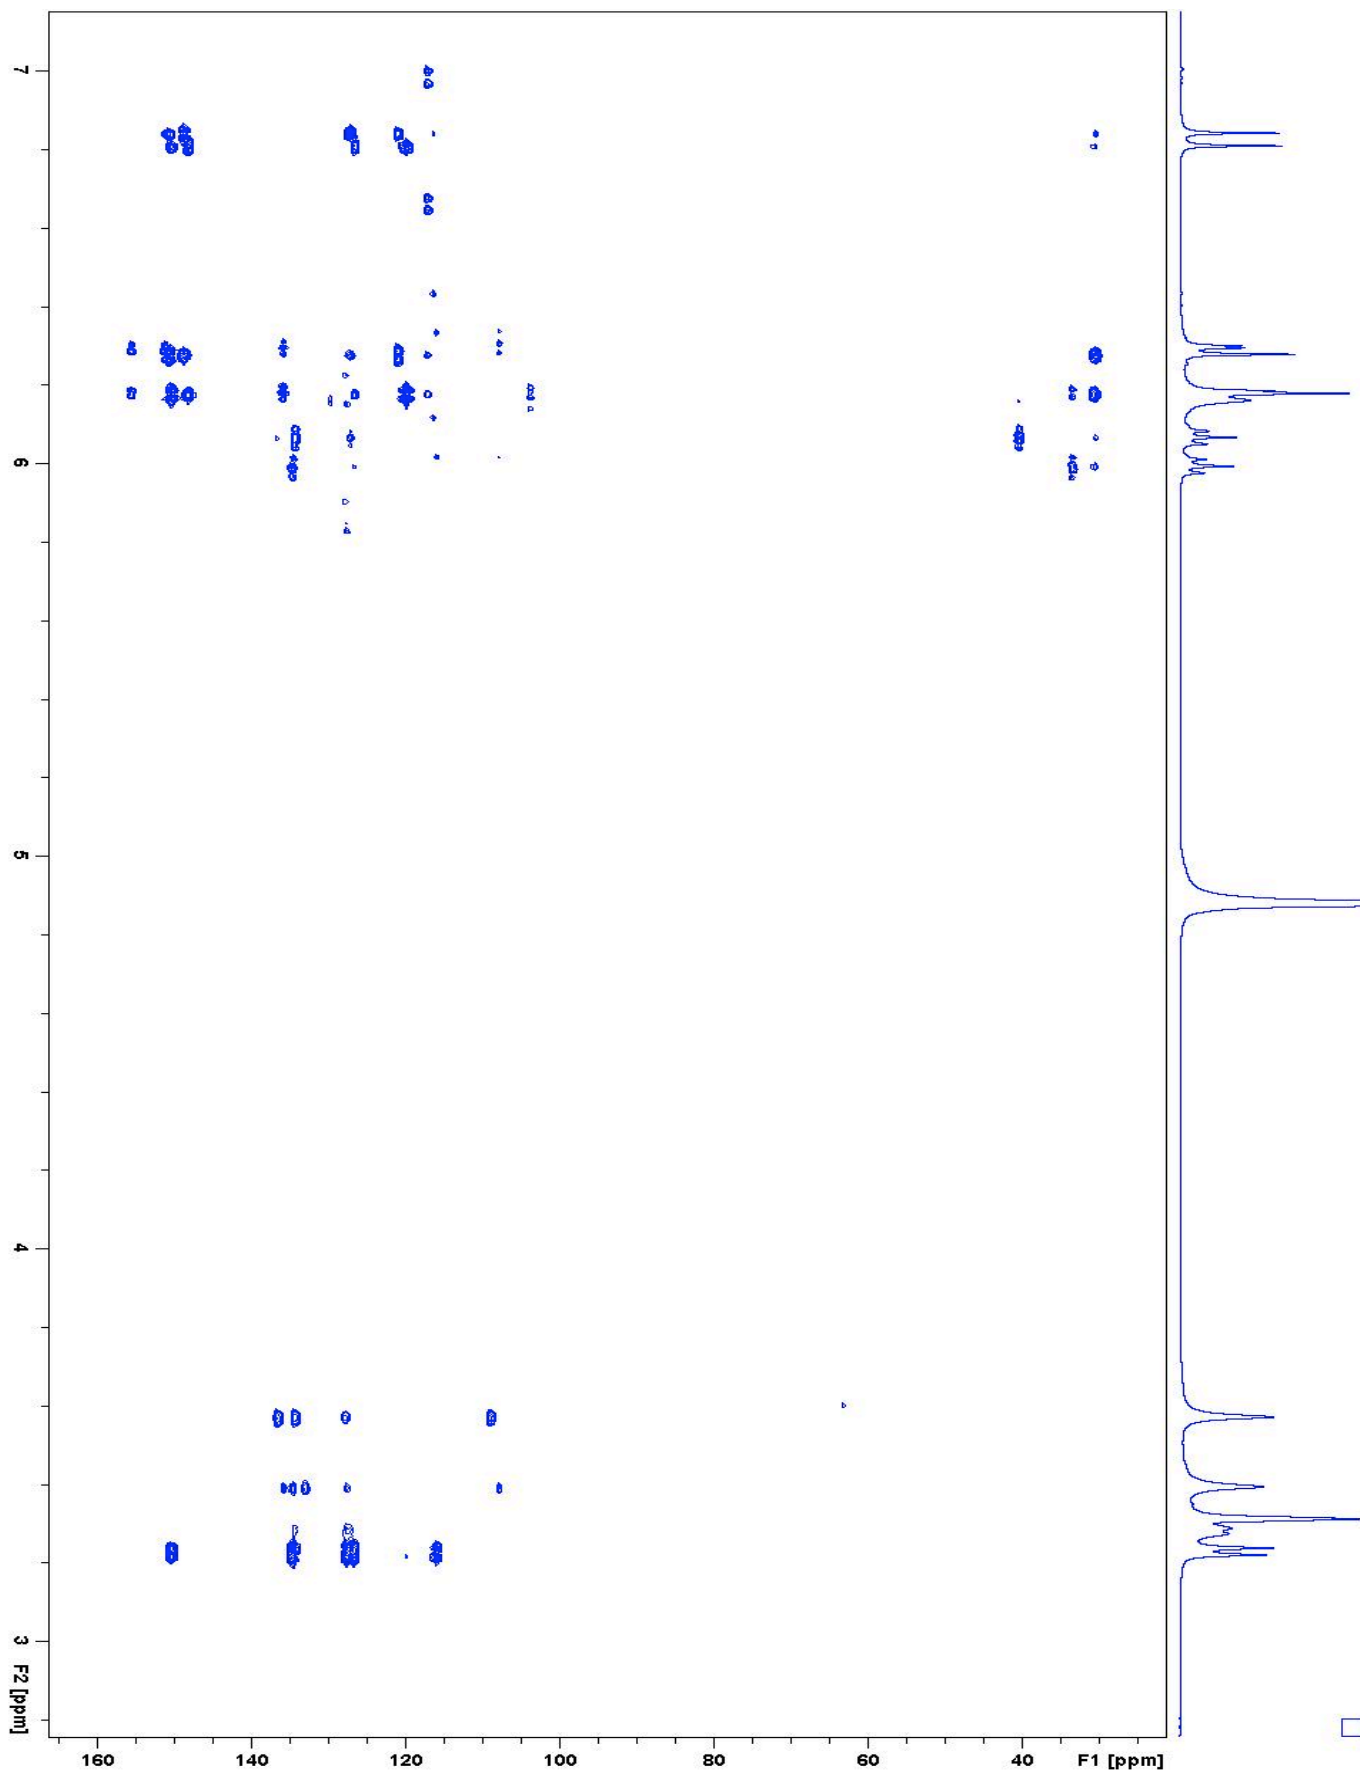

HMBC spectrum of chrysophentin A (**1**) in MeOD- $d_4$

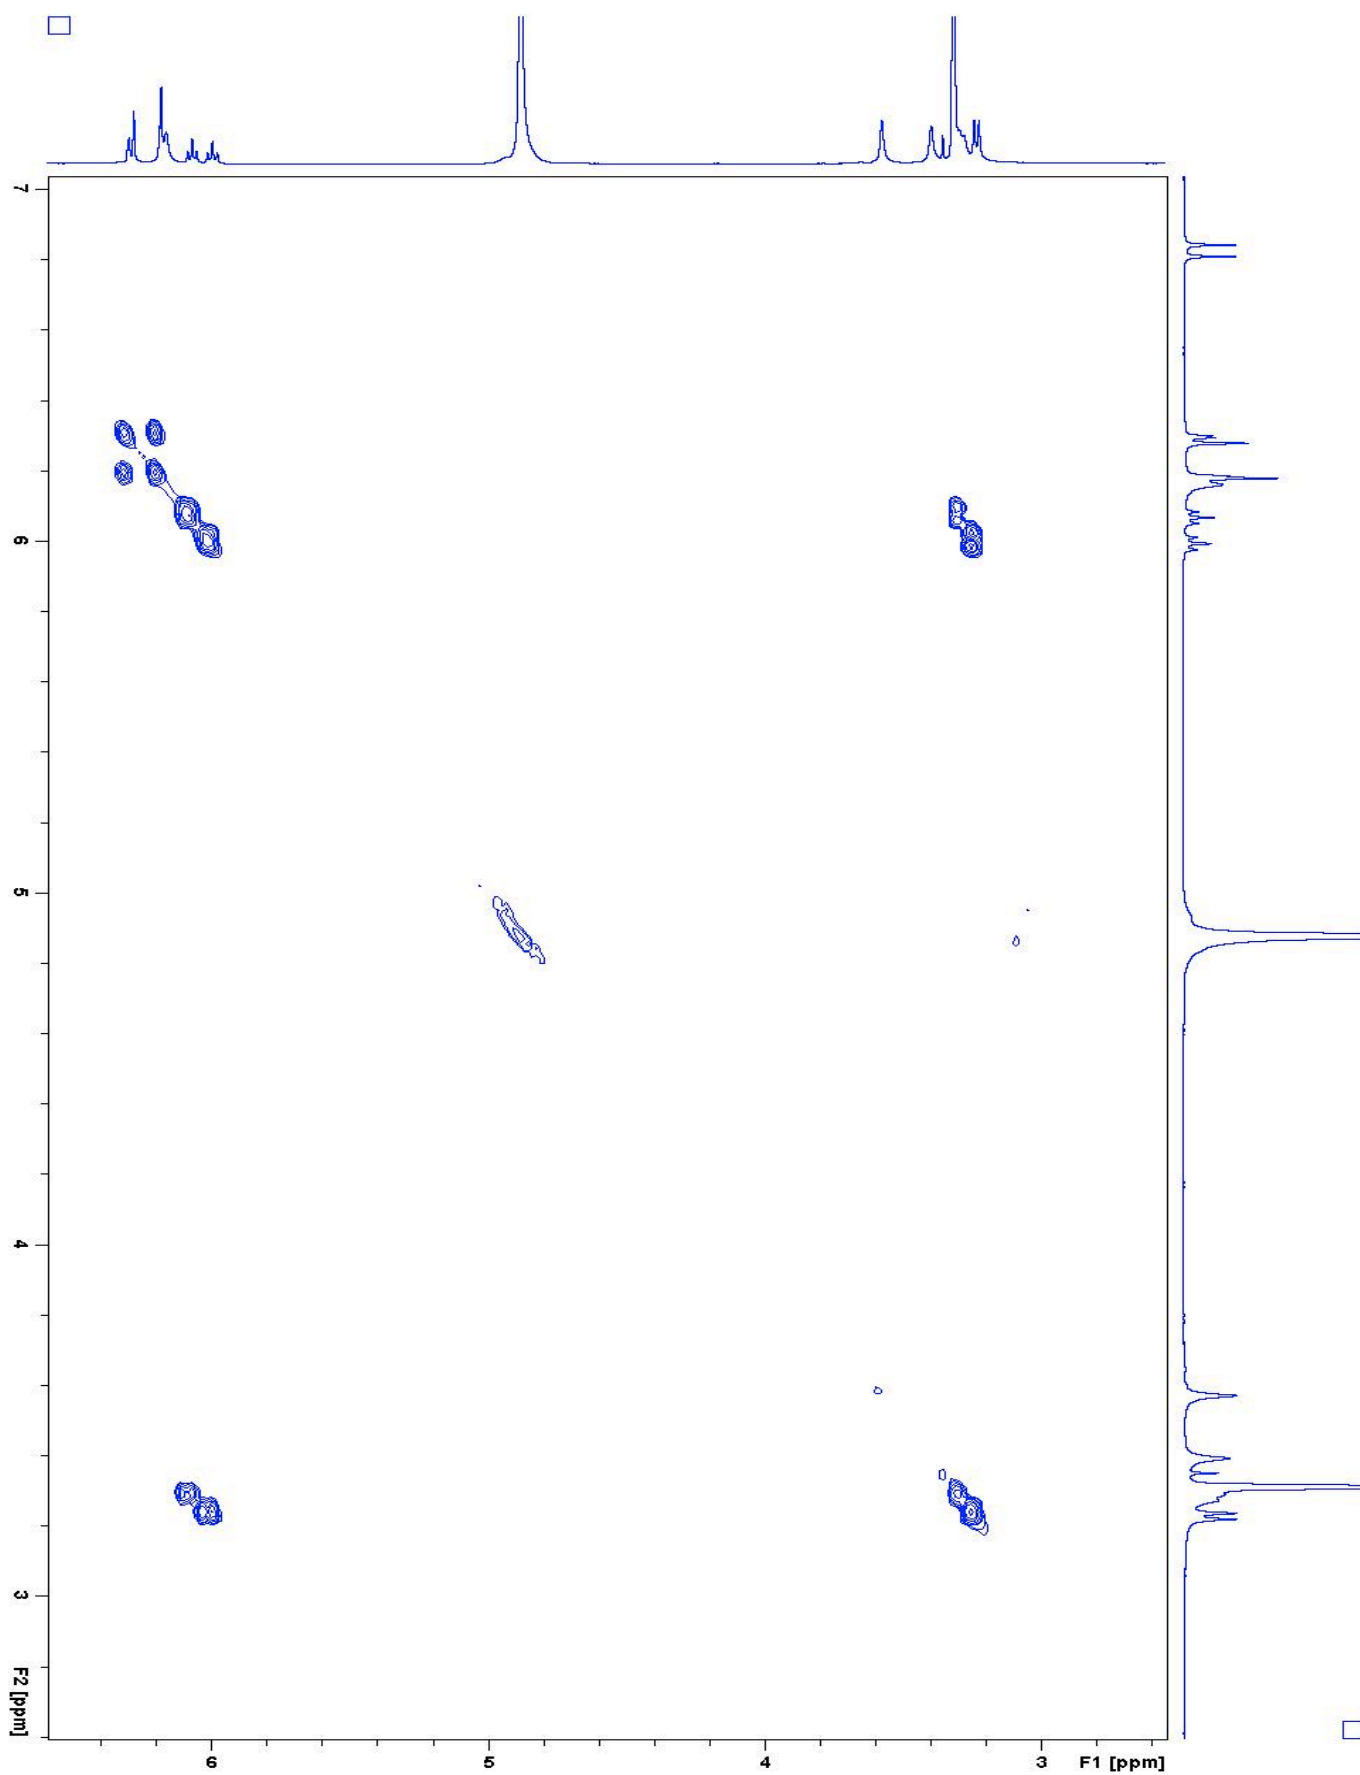

DQF-COSY spectrum of chrysophentin A (**1**) in MeOD-*d*<sub>4</sub>

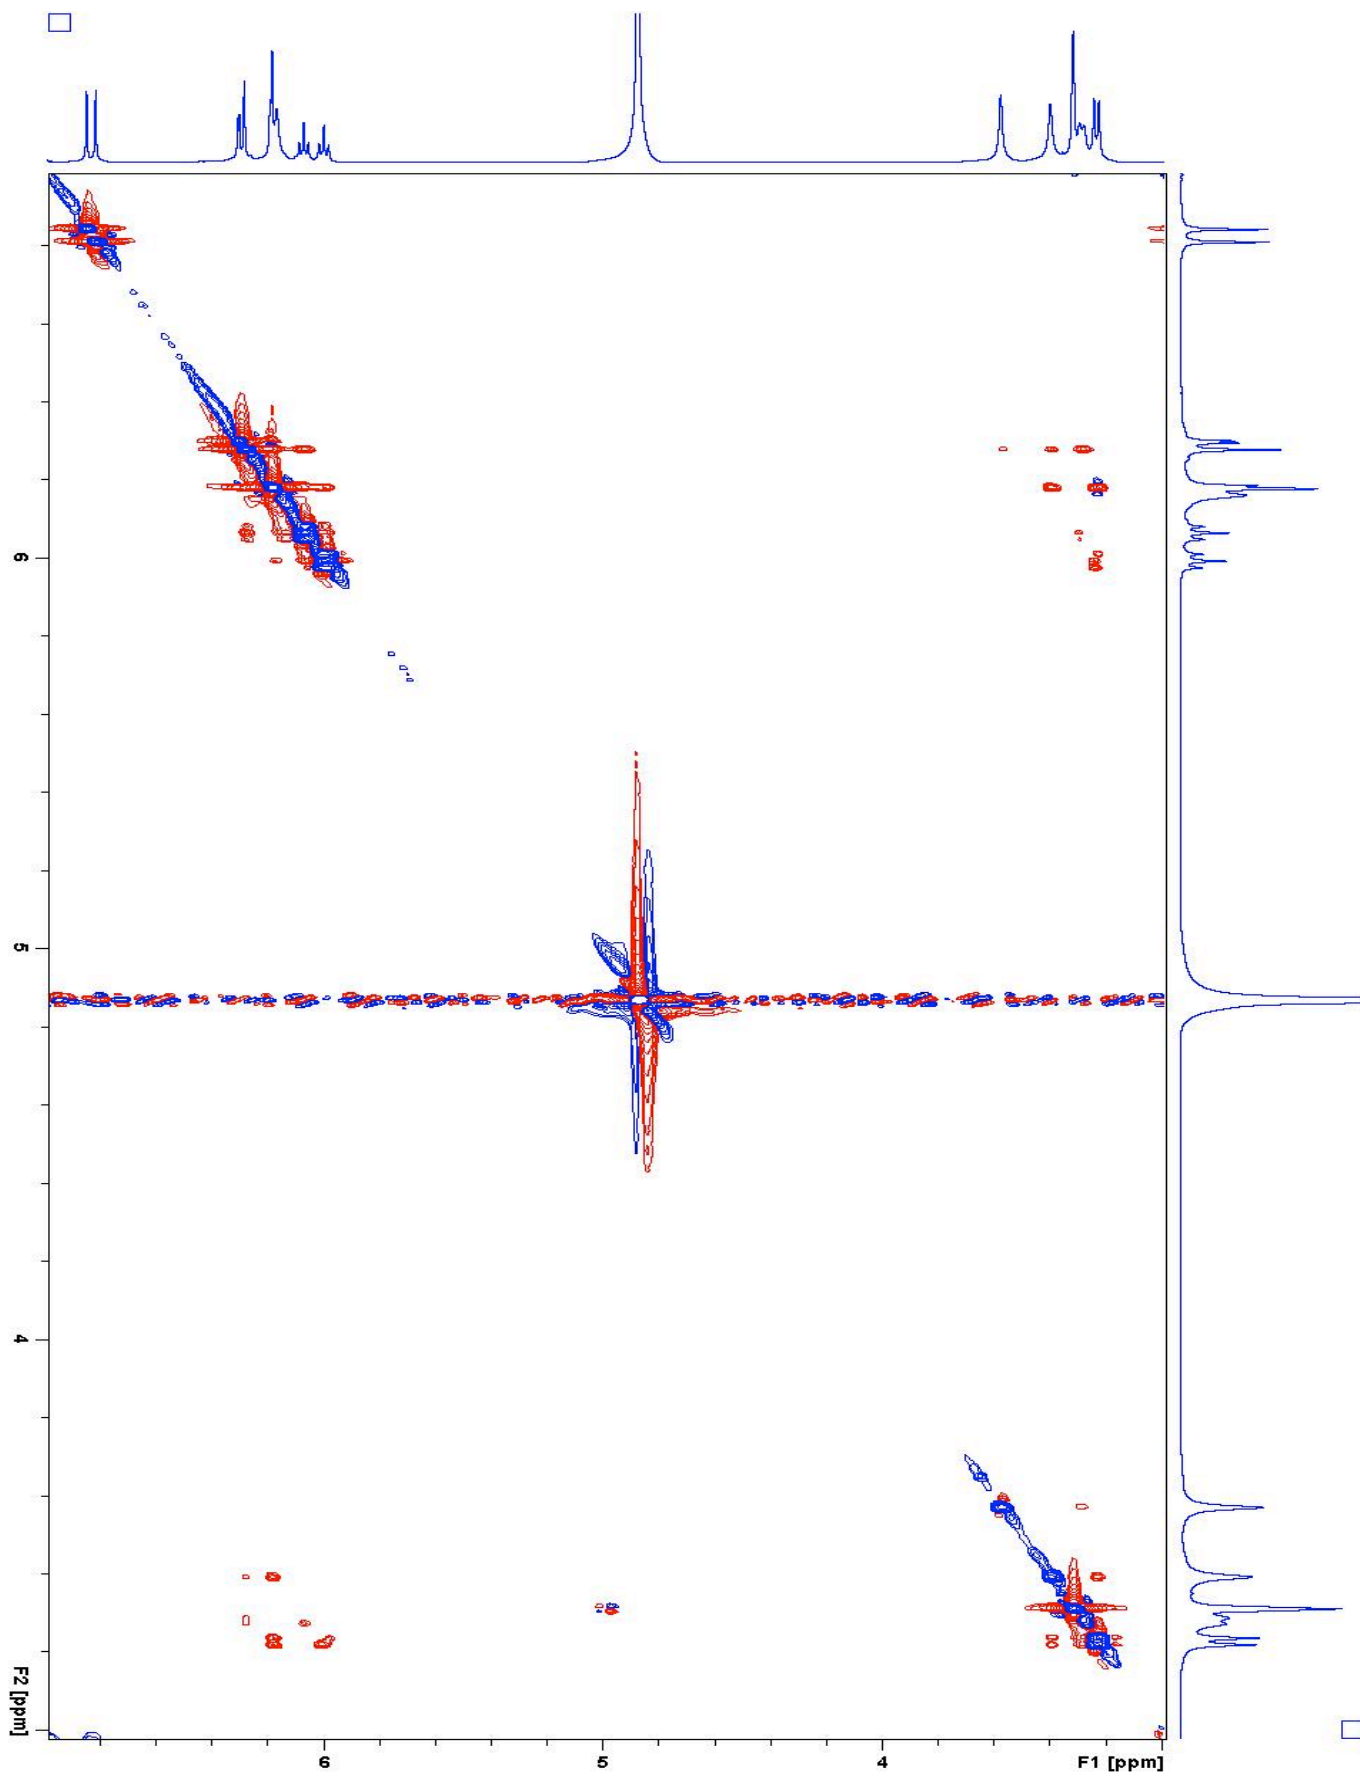

ROESY spectrum of chrysothentins A (**1**) in MeOD- $d_4$



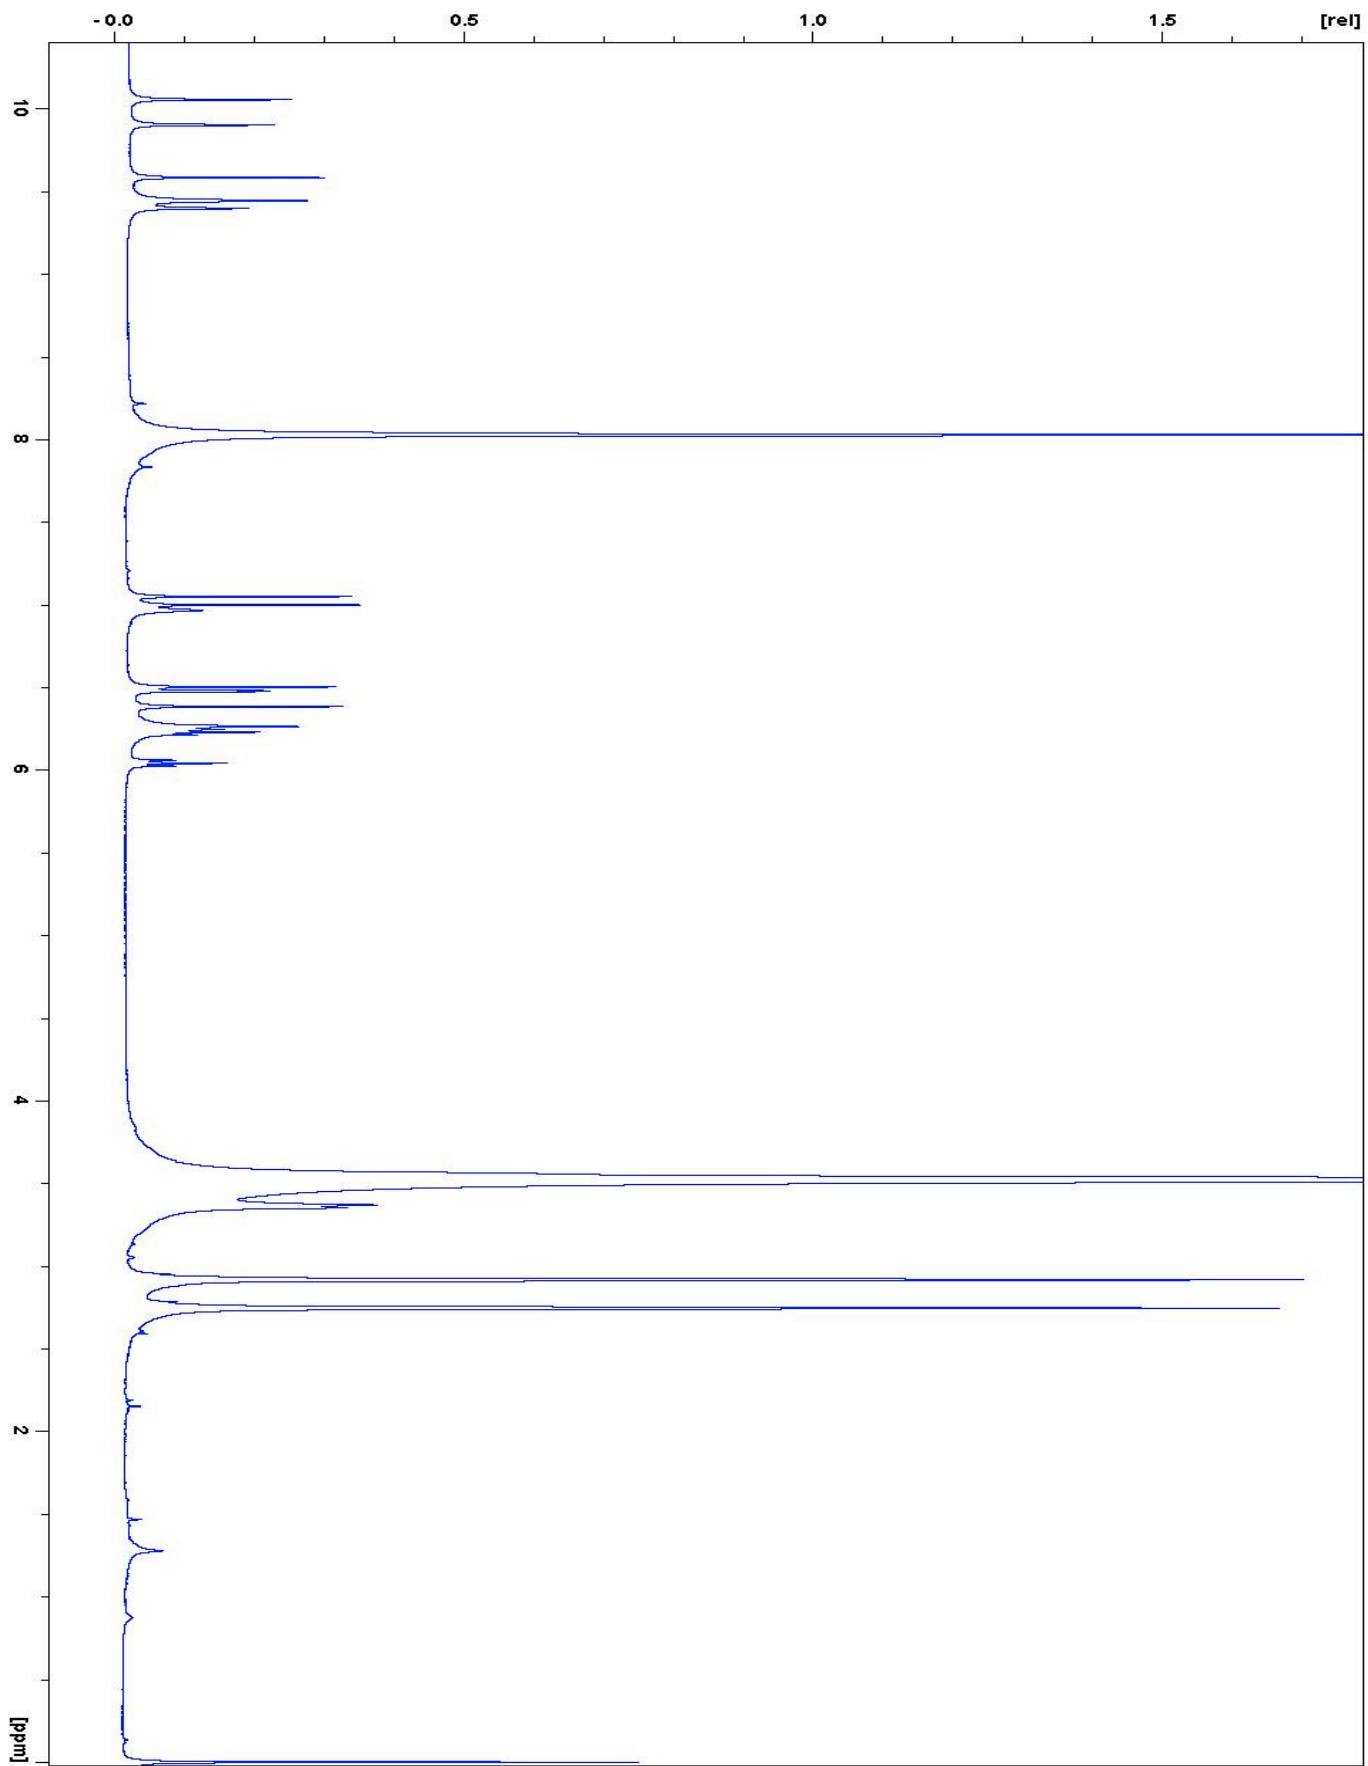

$^1\text{H}$  NMR spectrum of chrysophentin A (**1**) in  $\text{DMF-}d_7$

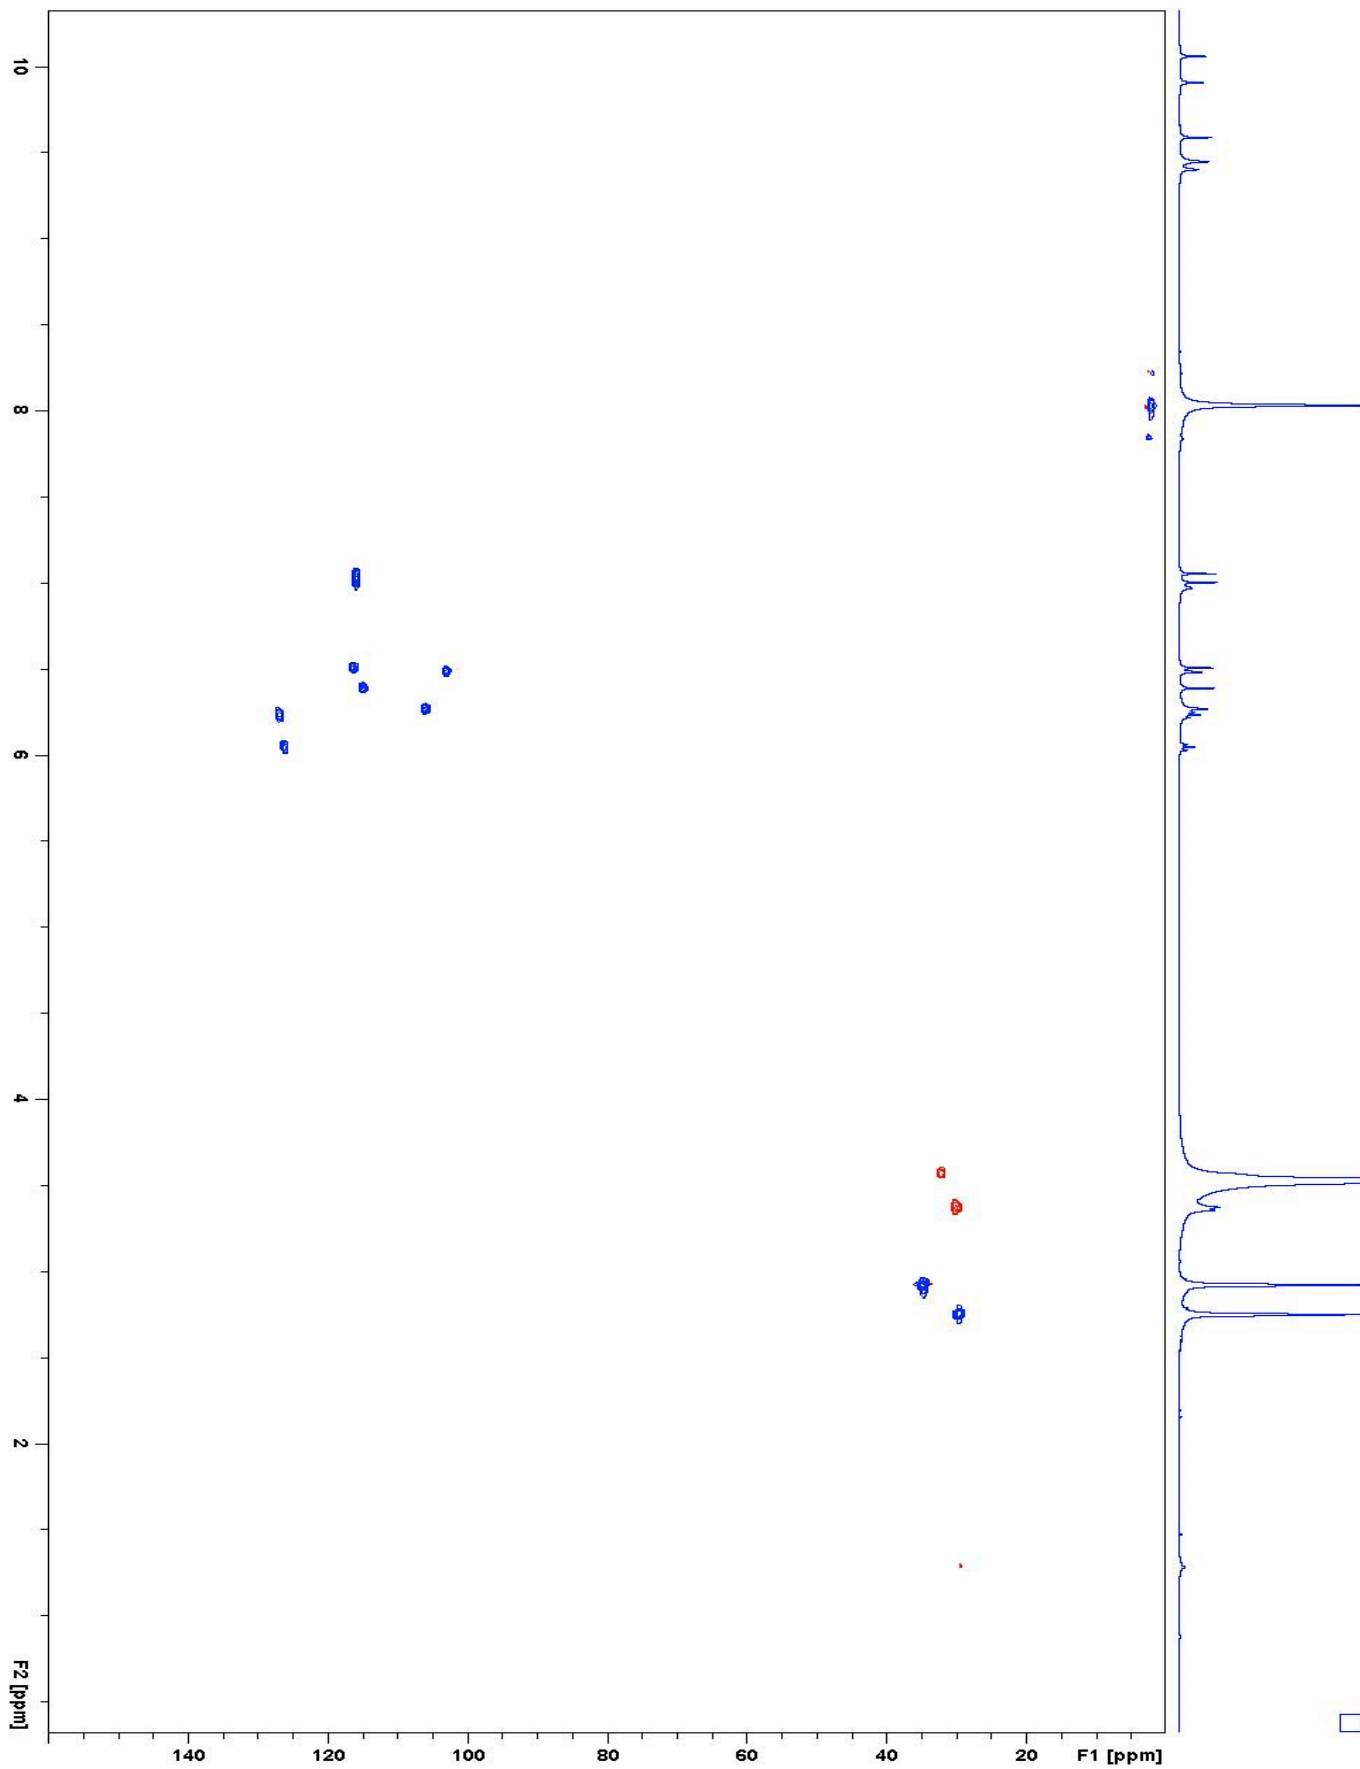

HSQC spectrum of chrysophenin A (**1**) in DMF-*d*<sub>7</sub>

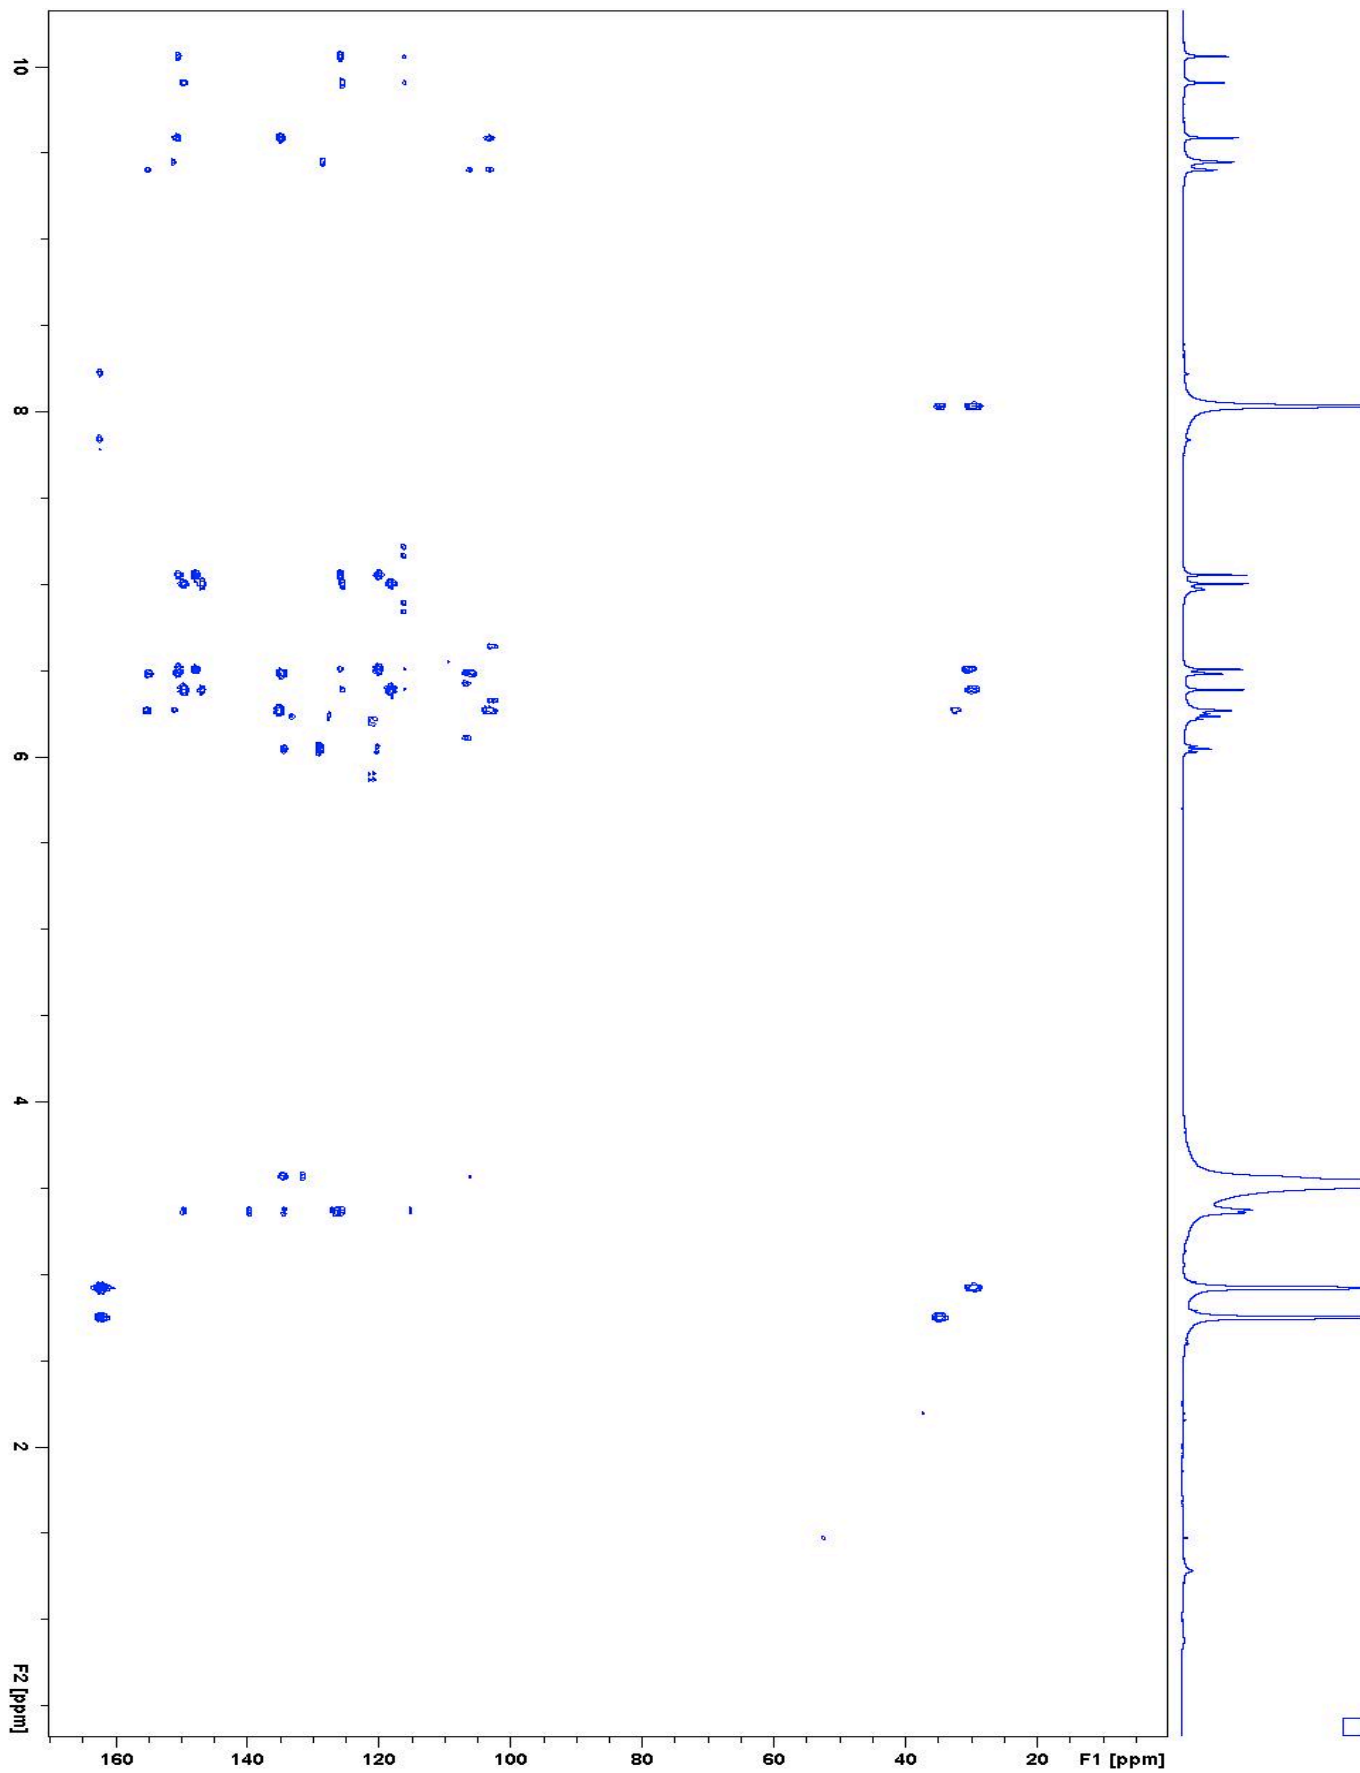

HMBC spectrum of chrysophentin A (**1**) in DMF-*d*<sub>7</sub>

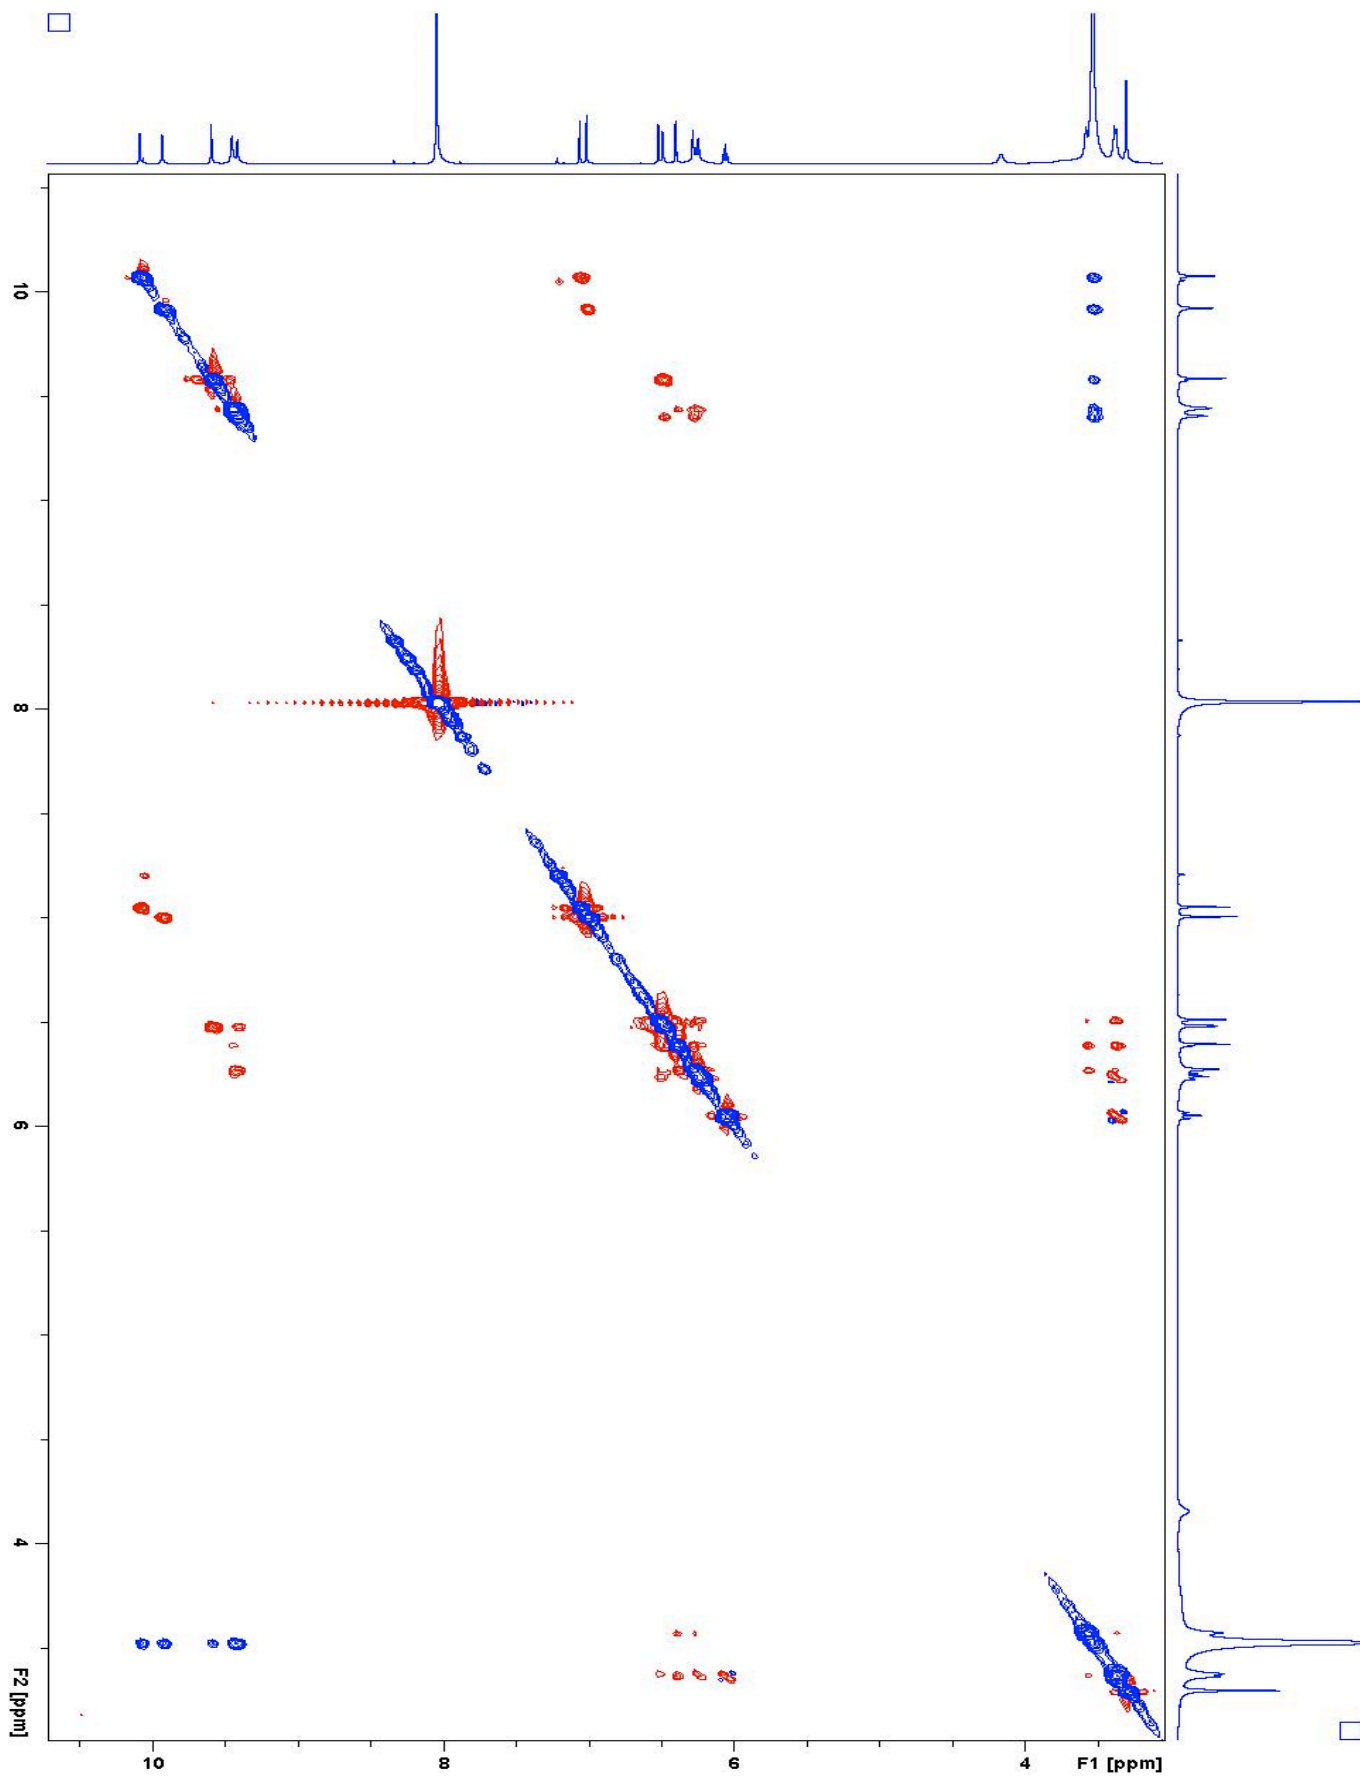

ROESY spectrum of chrysophentin A (**1**) in DMF-*d*<sub>7</sub>

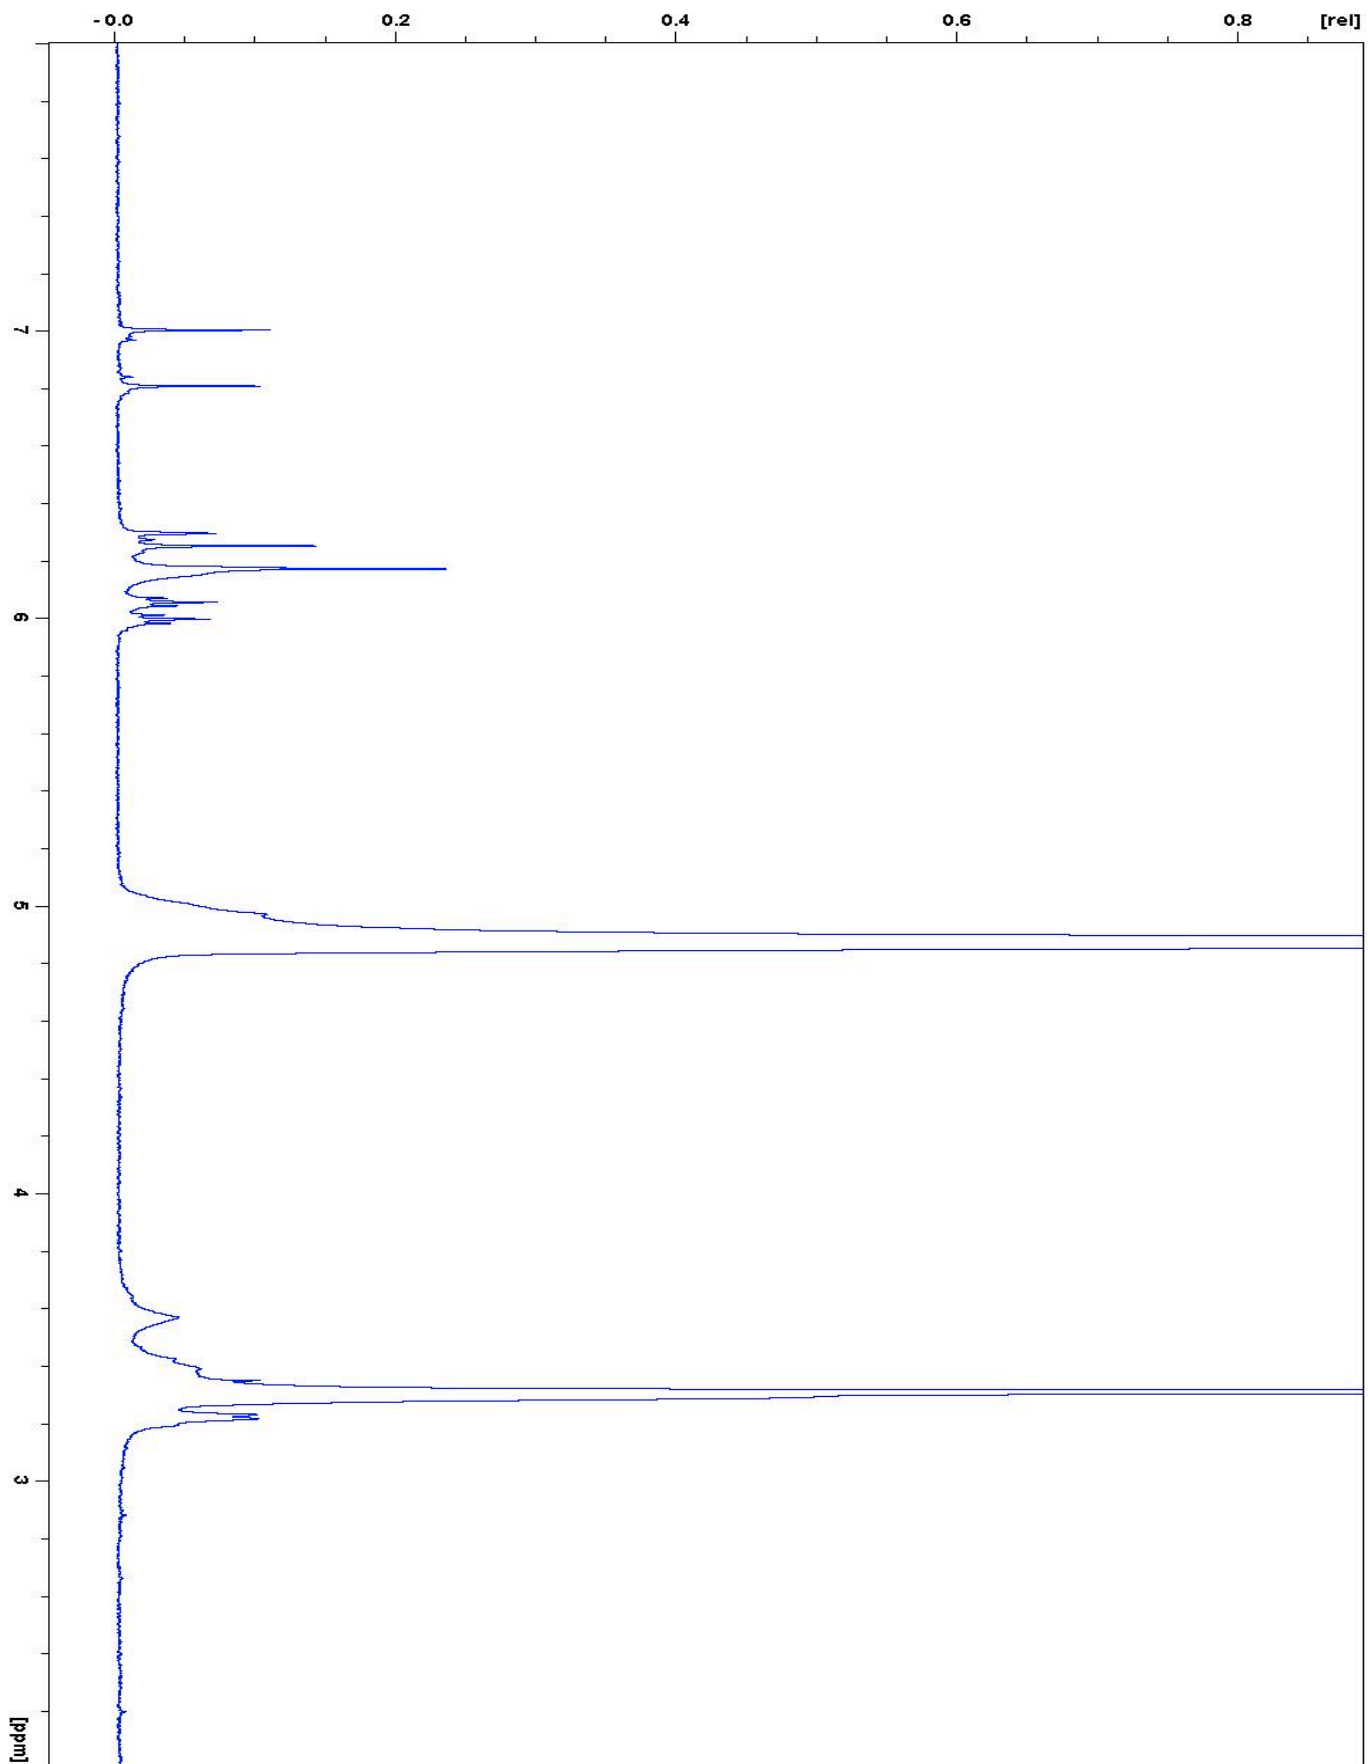

$^1\text{H}$  NMR spectrum of chrysophentin B (**2**) in  $\text{MeOD-}d_4$

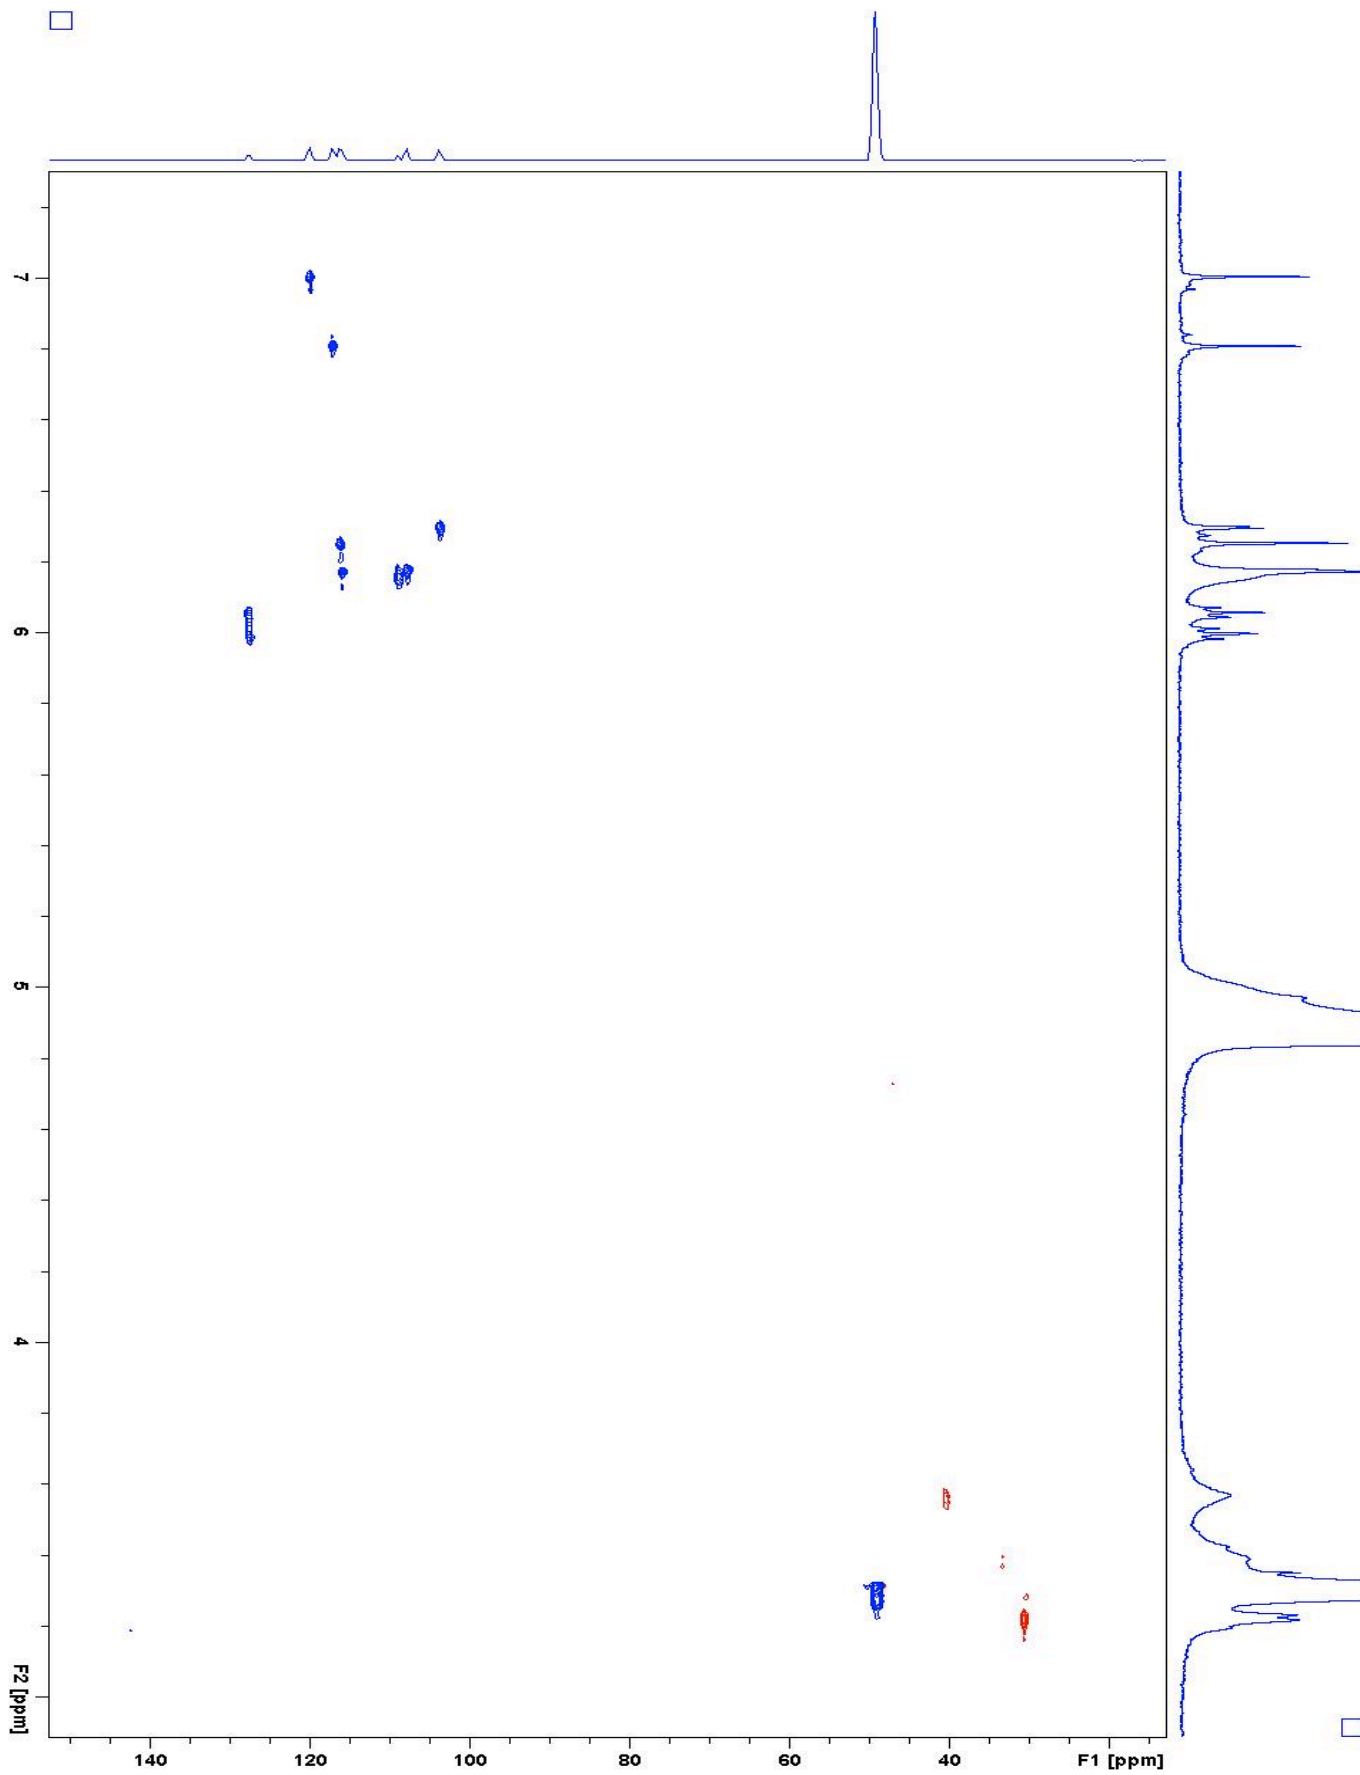

HSQC spectrum of chrysophentin B (2) in MeOD- $d_4$

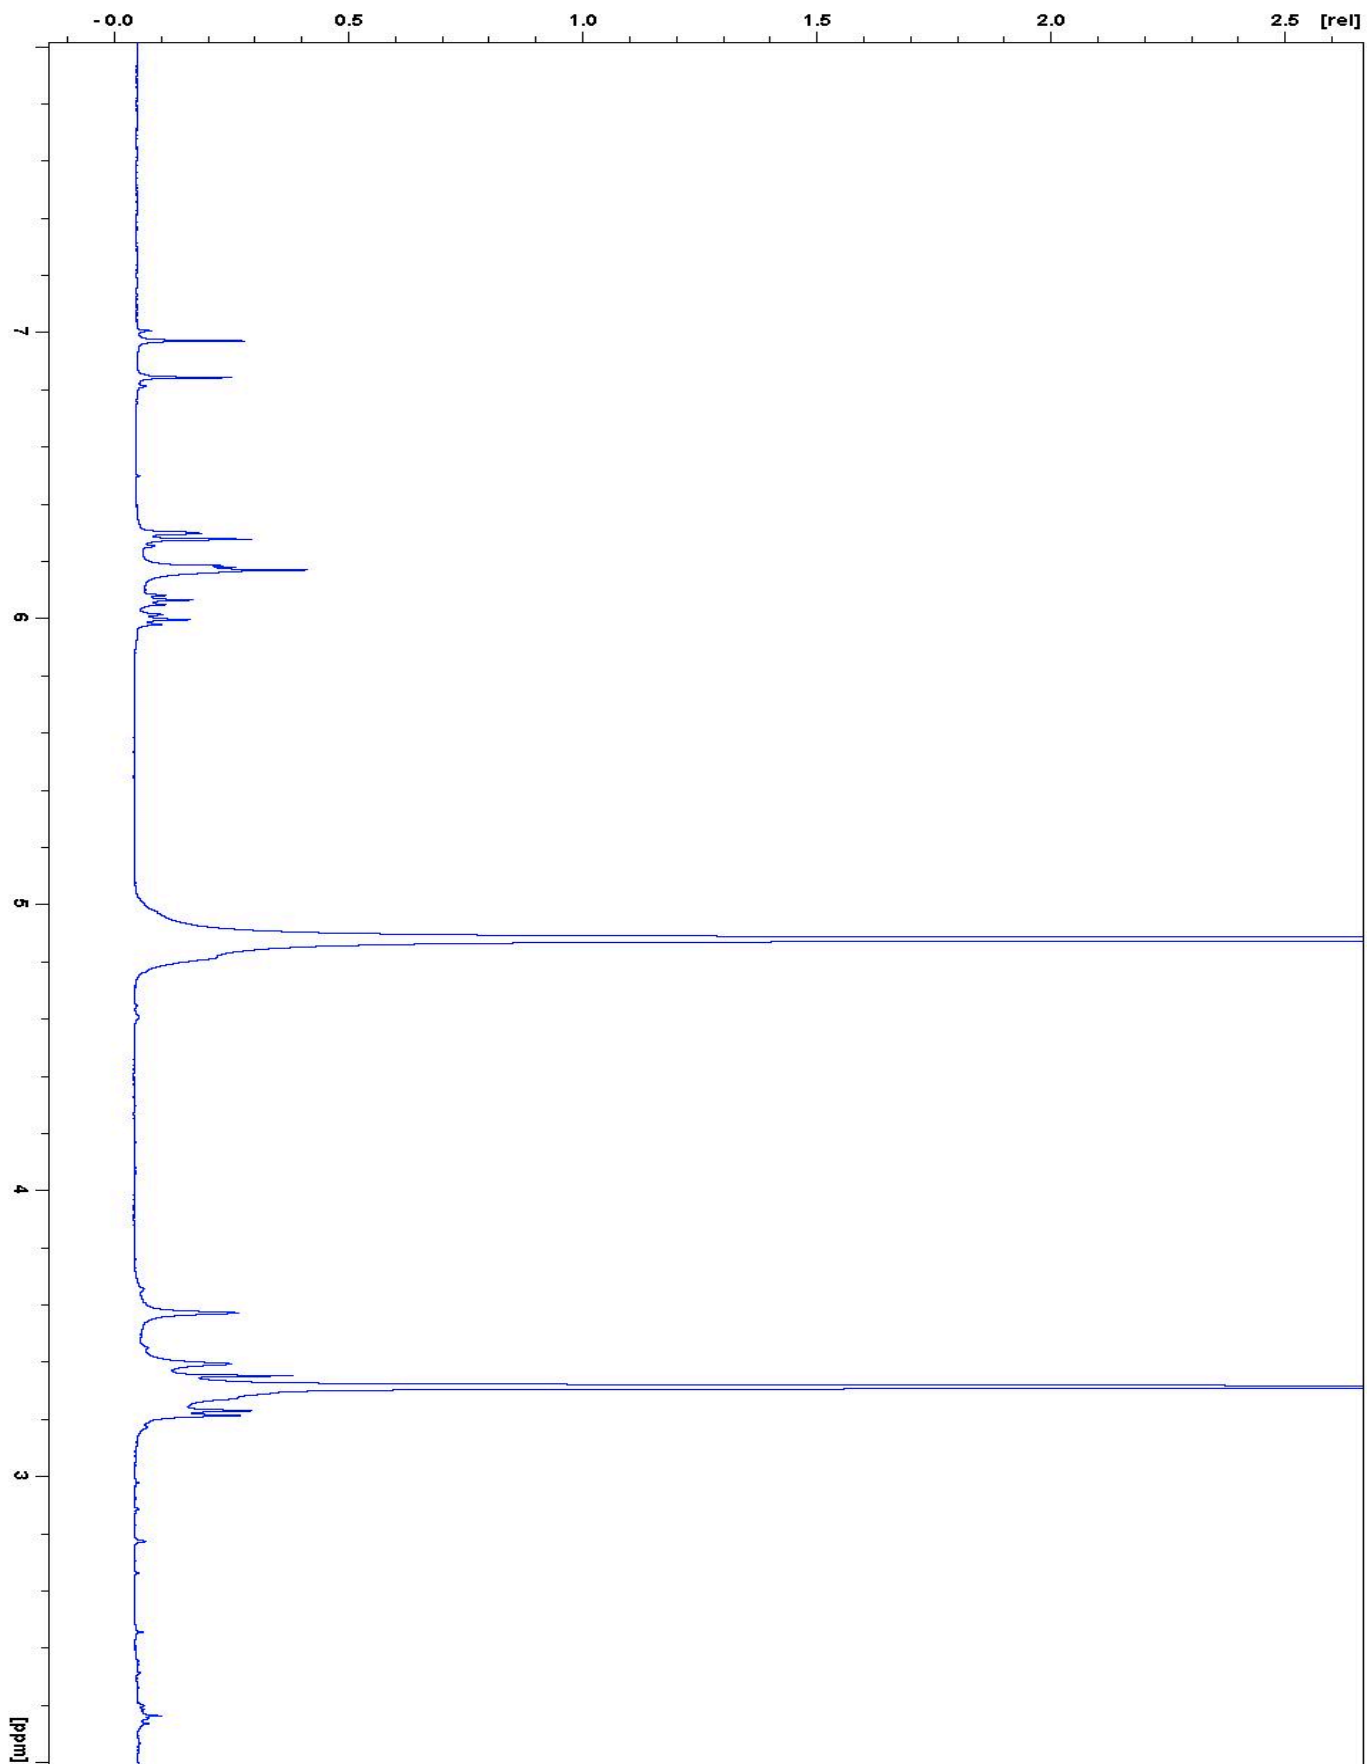

$^1\text{H}$  NMR spectrum of chrysophentin C (**3**) in  $\text{MeOD-}d_4$

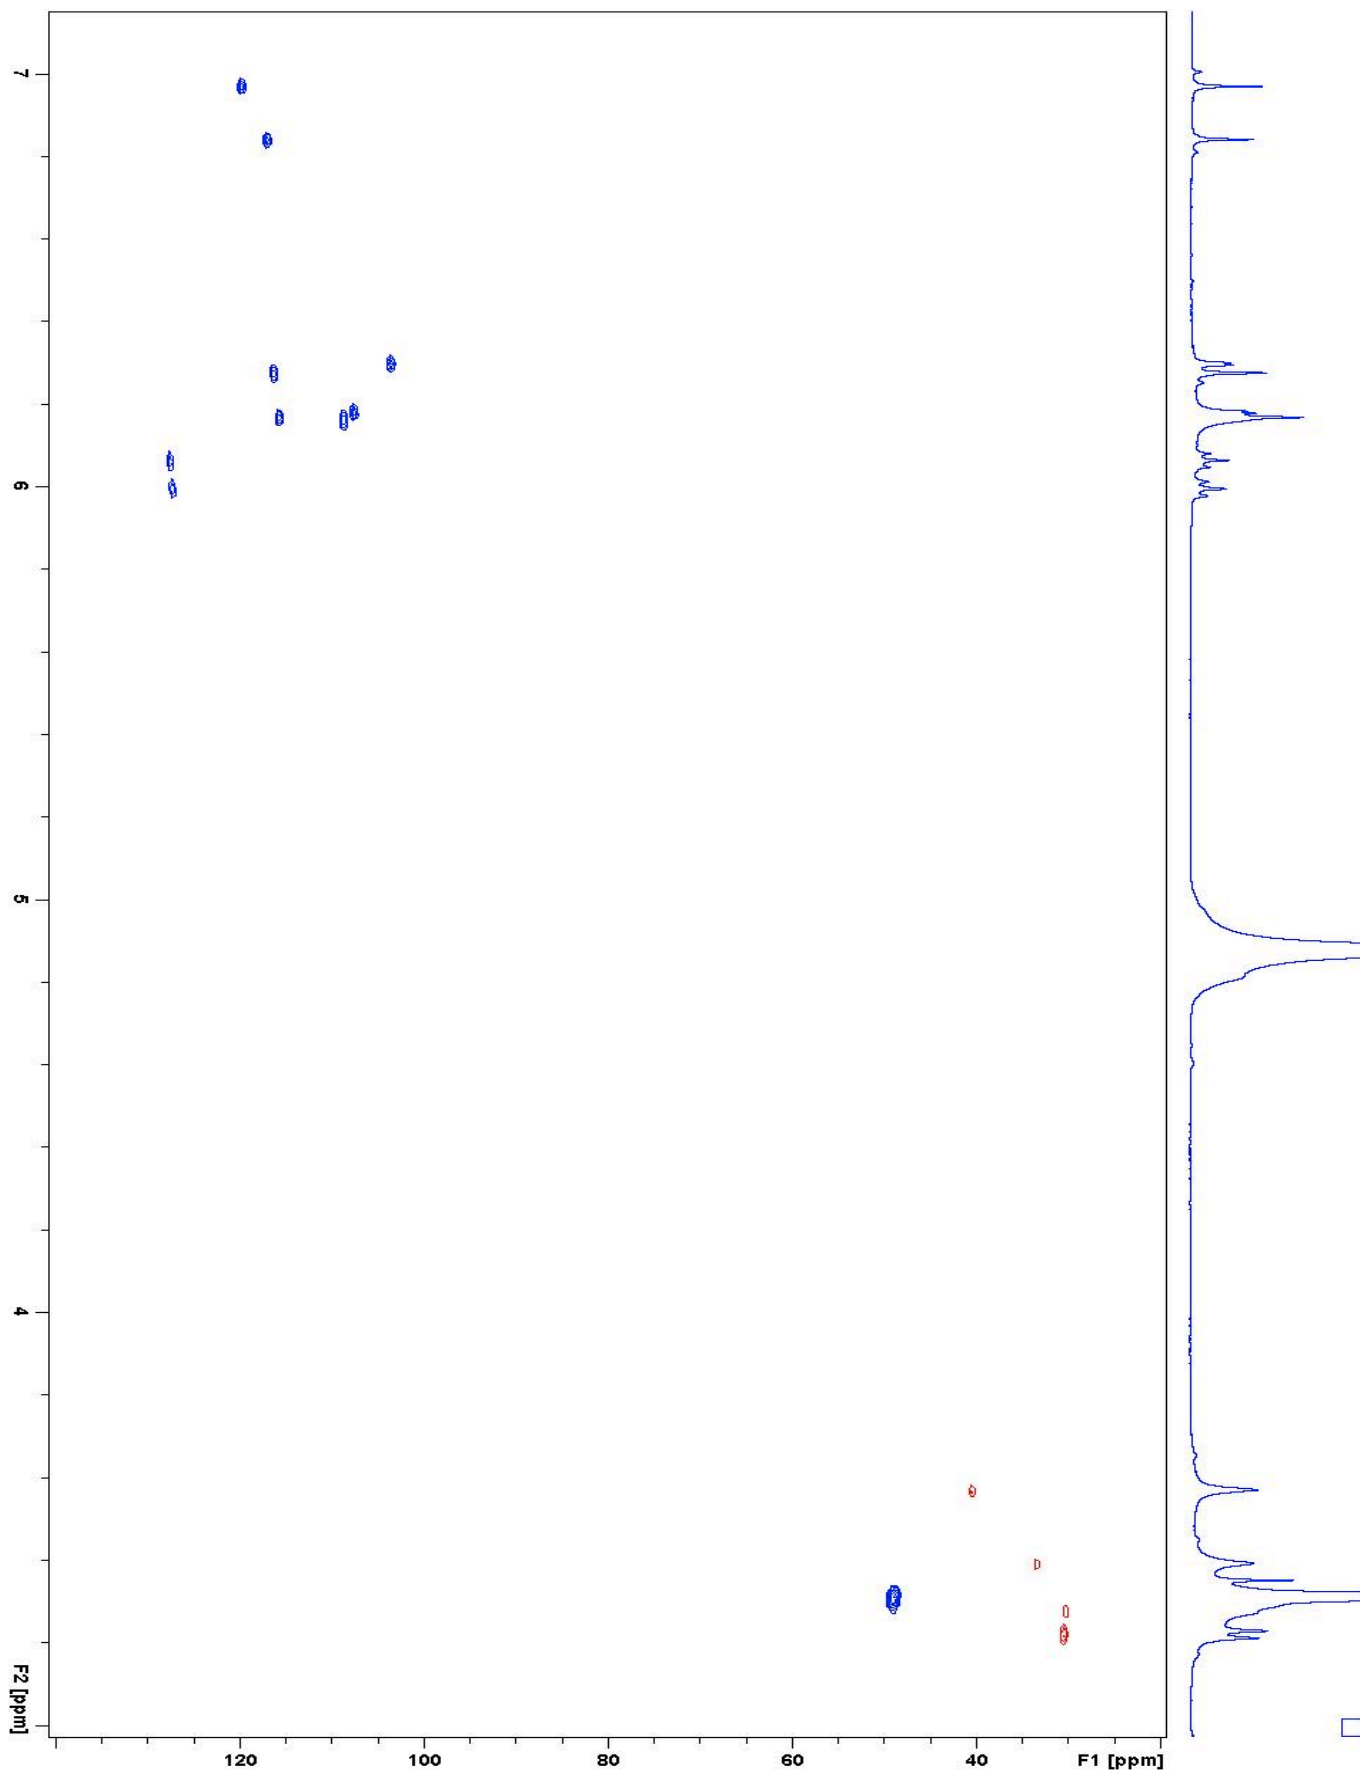

HSQC spectrum of chrysophenitine C (**3**) in MeOD-*d*<sub>4</sub>



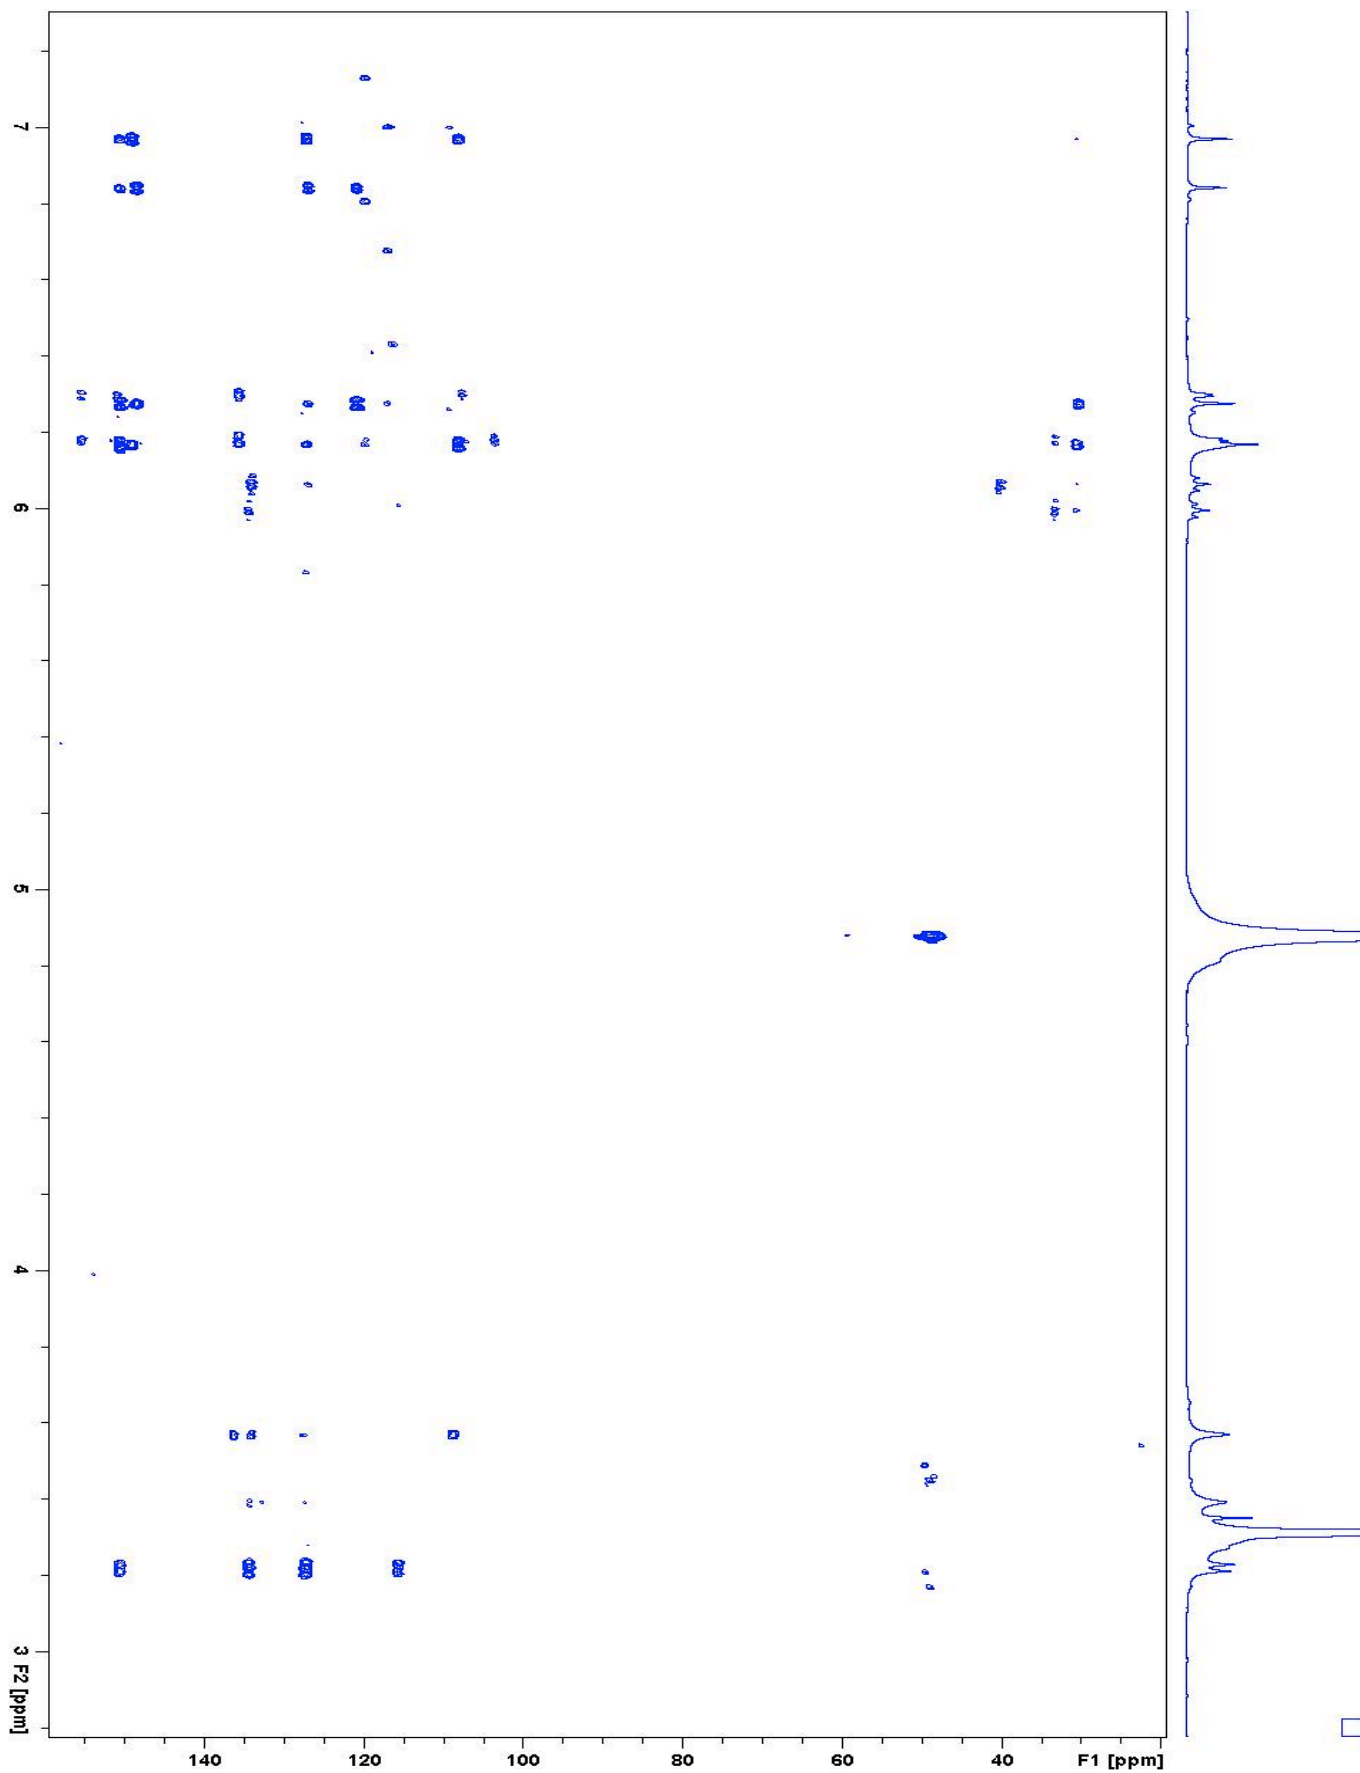

HMBC spectrum of chrysophentin C (3) in MeOD-*d*<sub>4</sub>

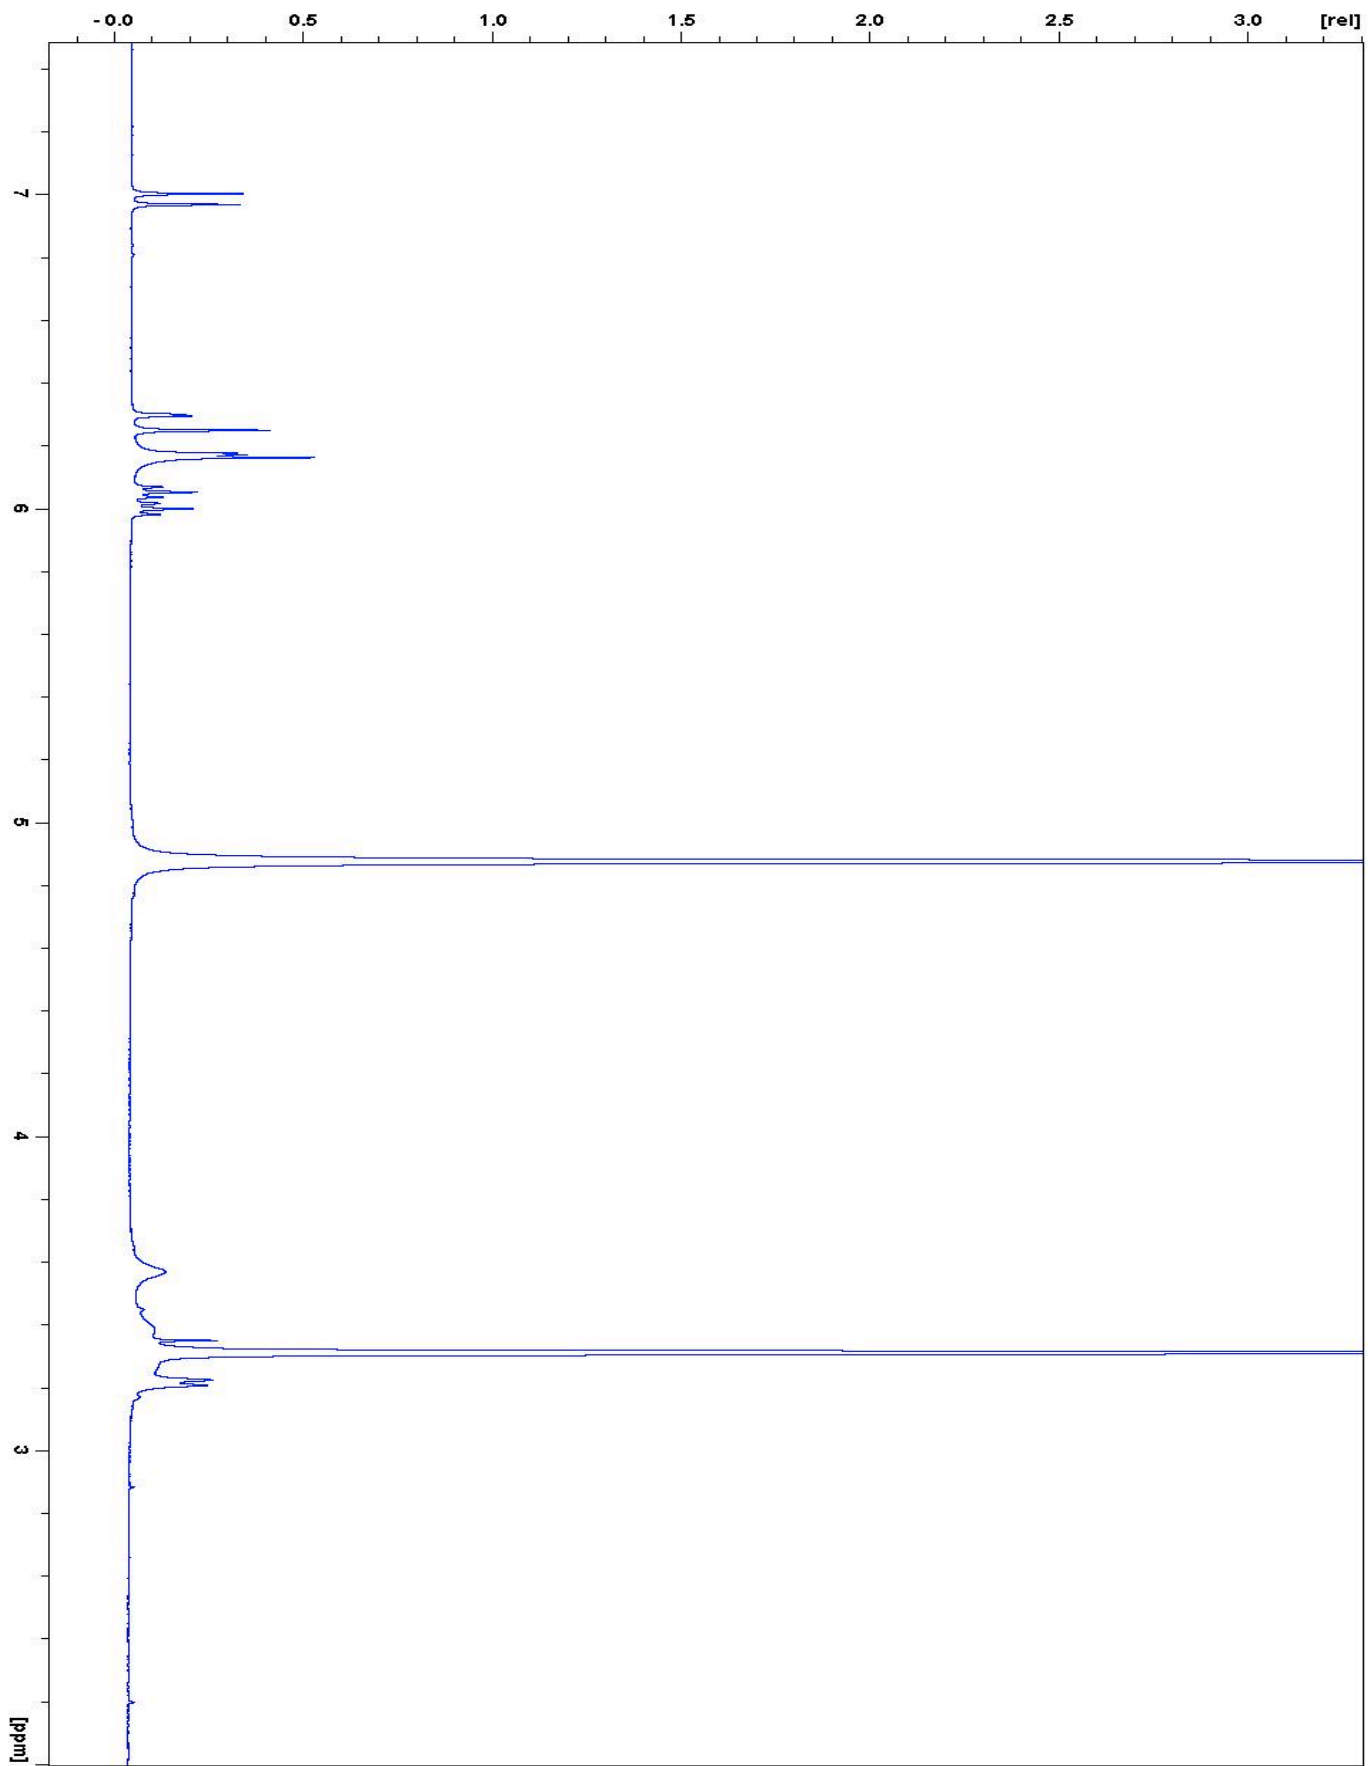

$^1\text{H}$  NMR spectrum of chrysophentin D (**4**) in  $\text{MeOD-}d_4$

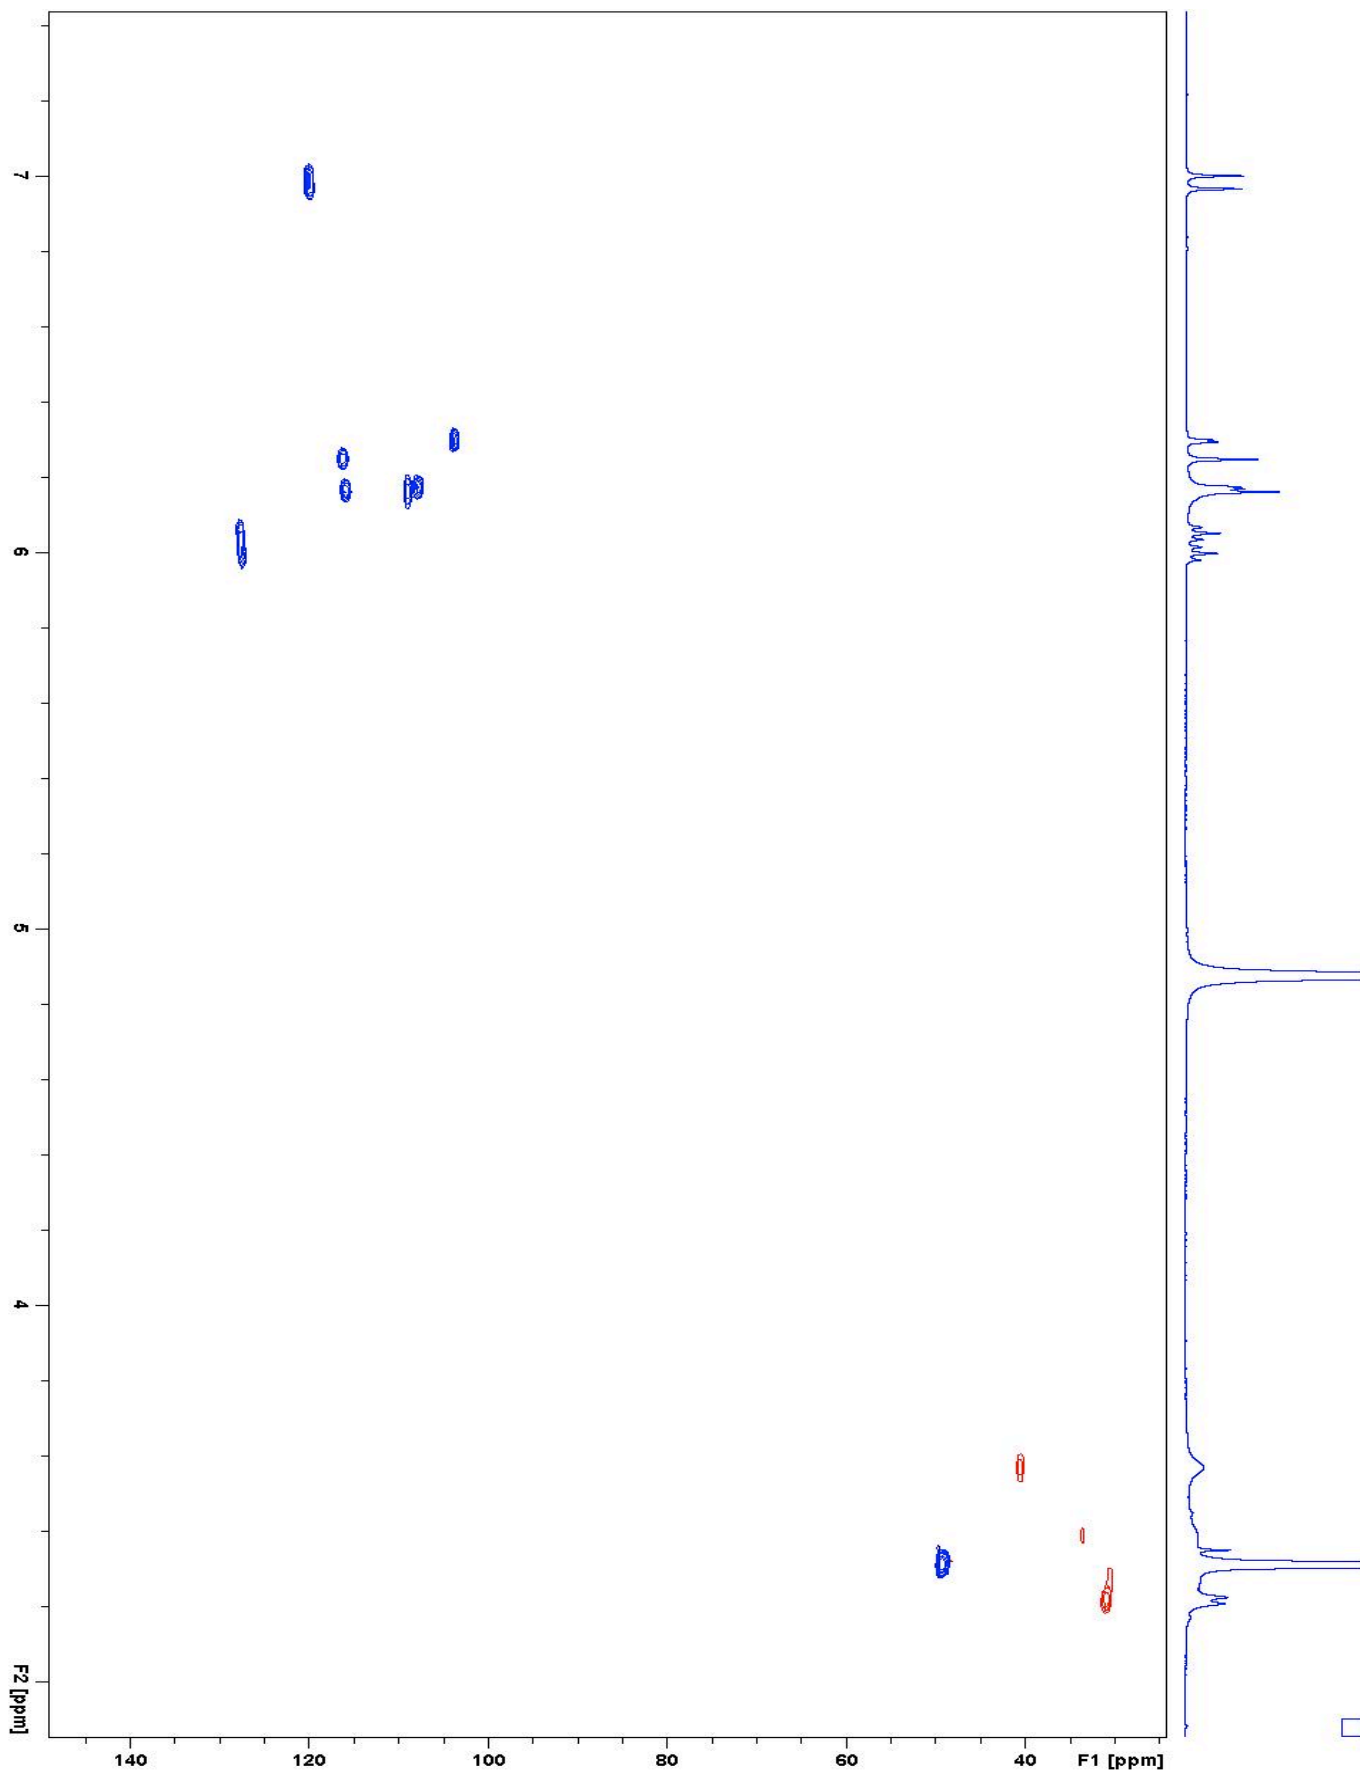

HSQC spectrum of chrysophentin D (**4**) in MeOD-*d*<sub>4</sub>

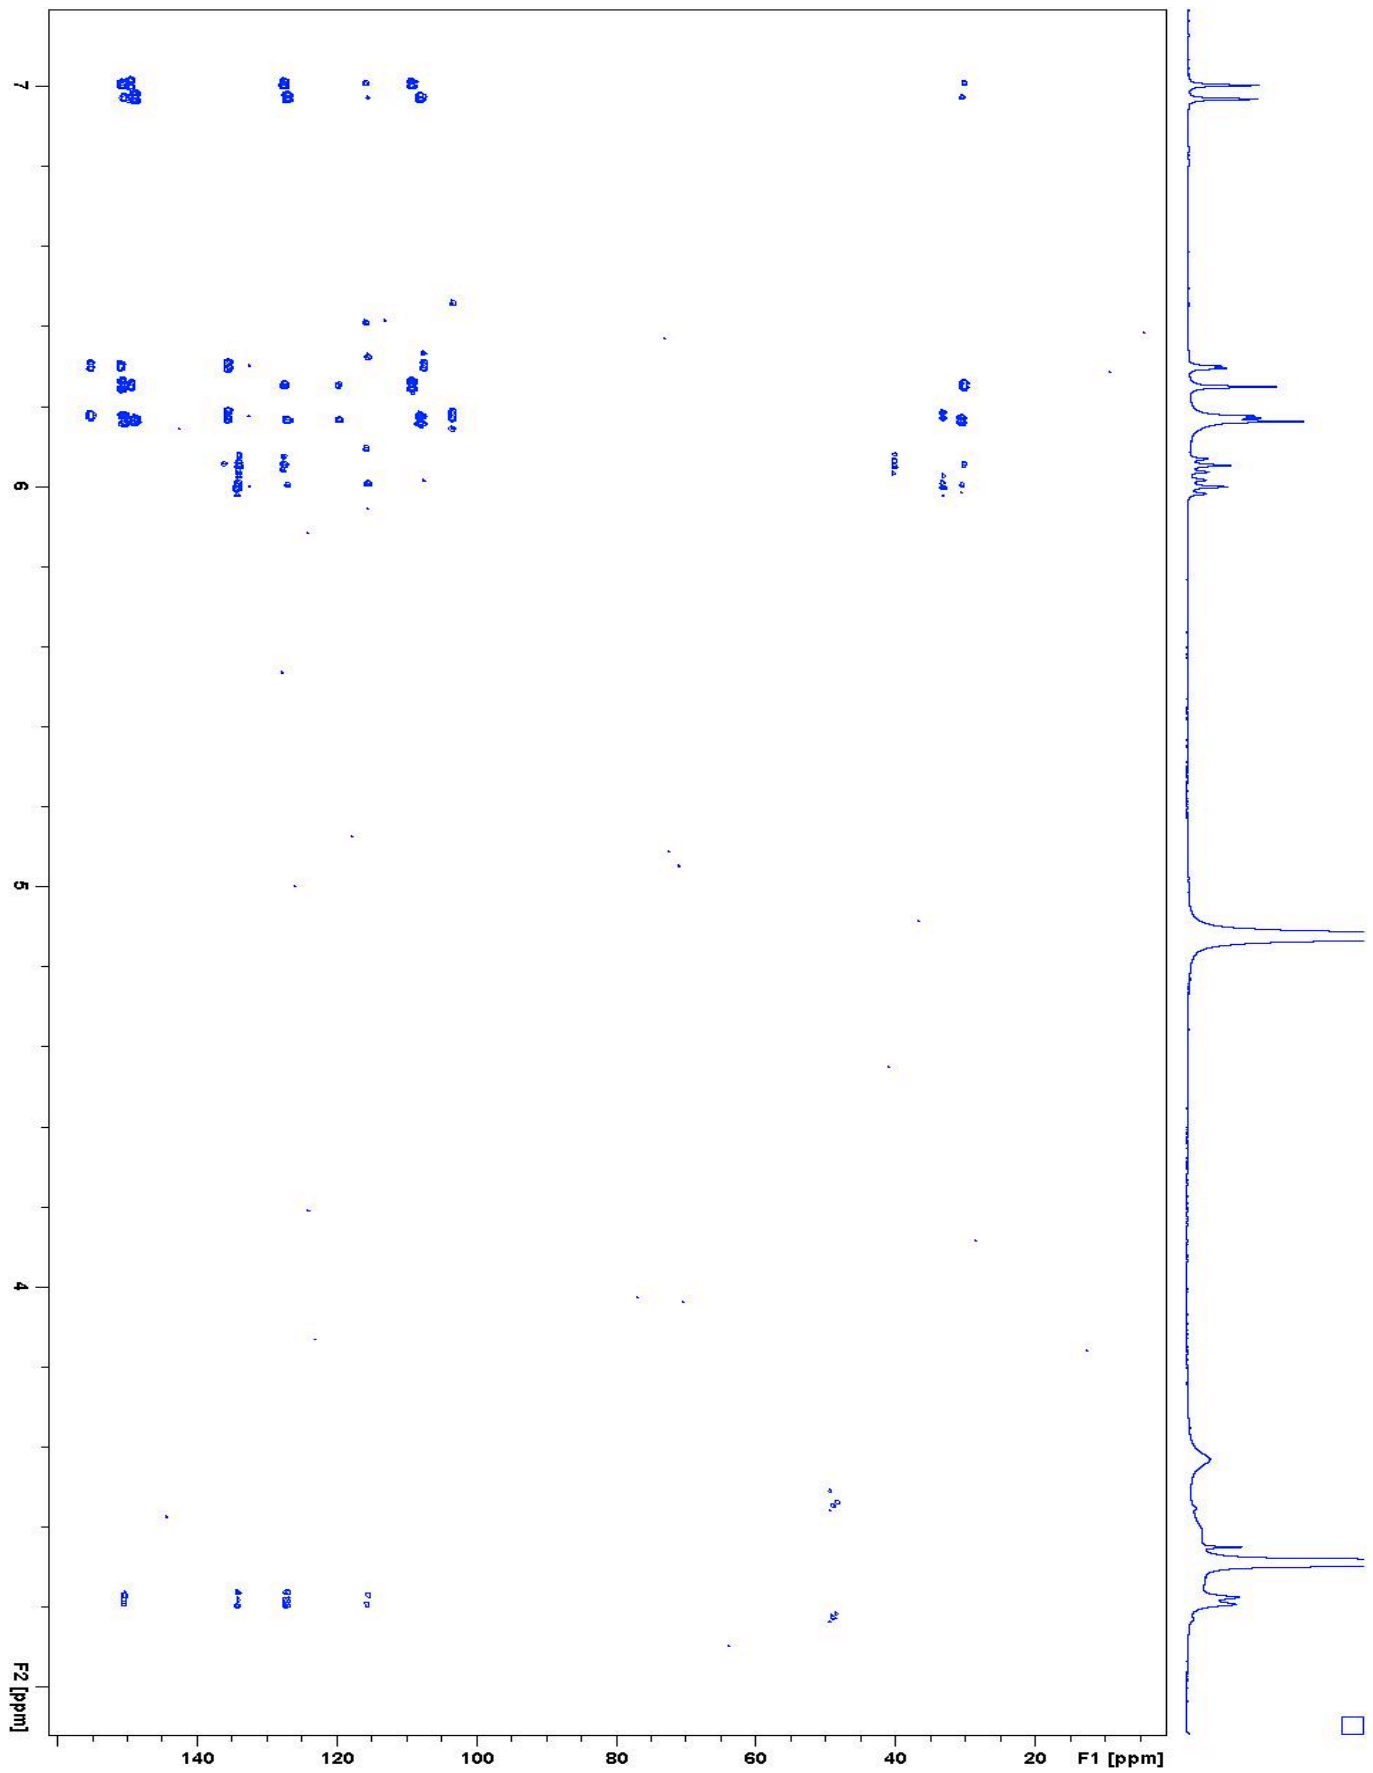

HMBC spectrum of chrysophentin D (4) in MeOD- $d_4$

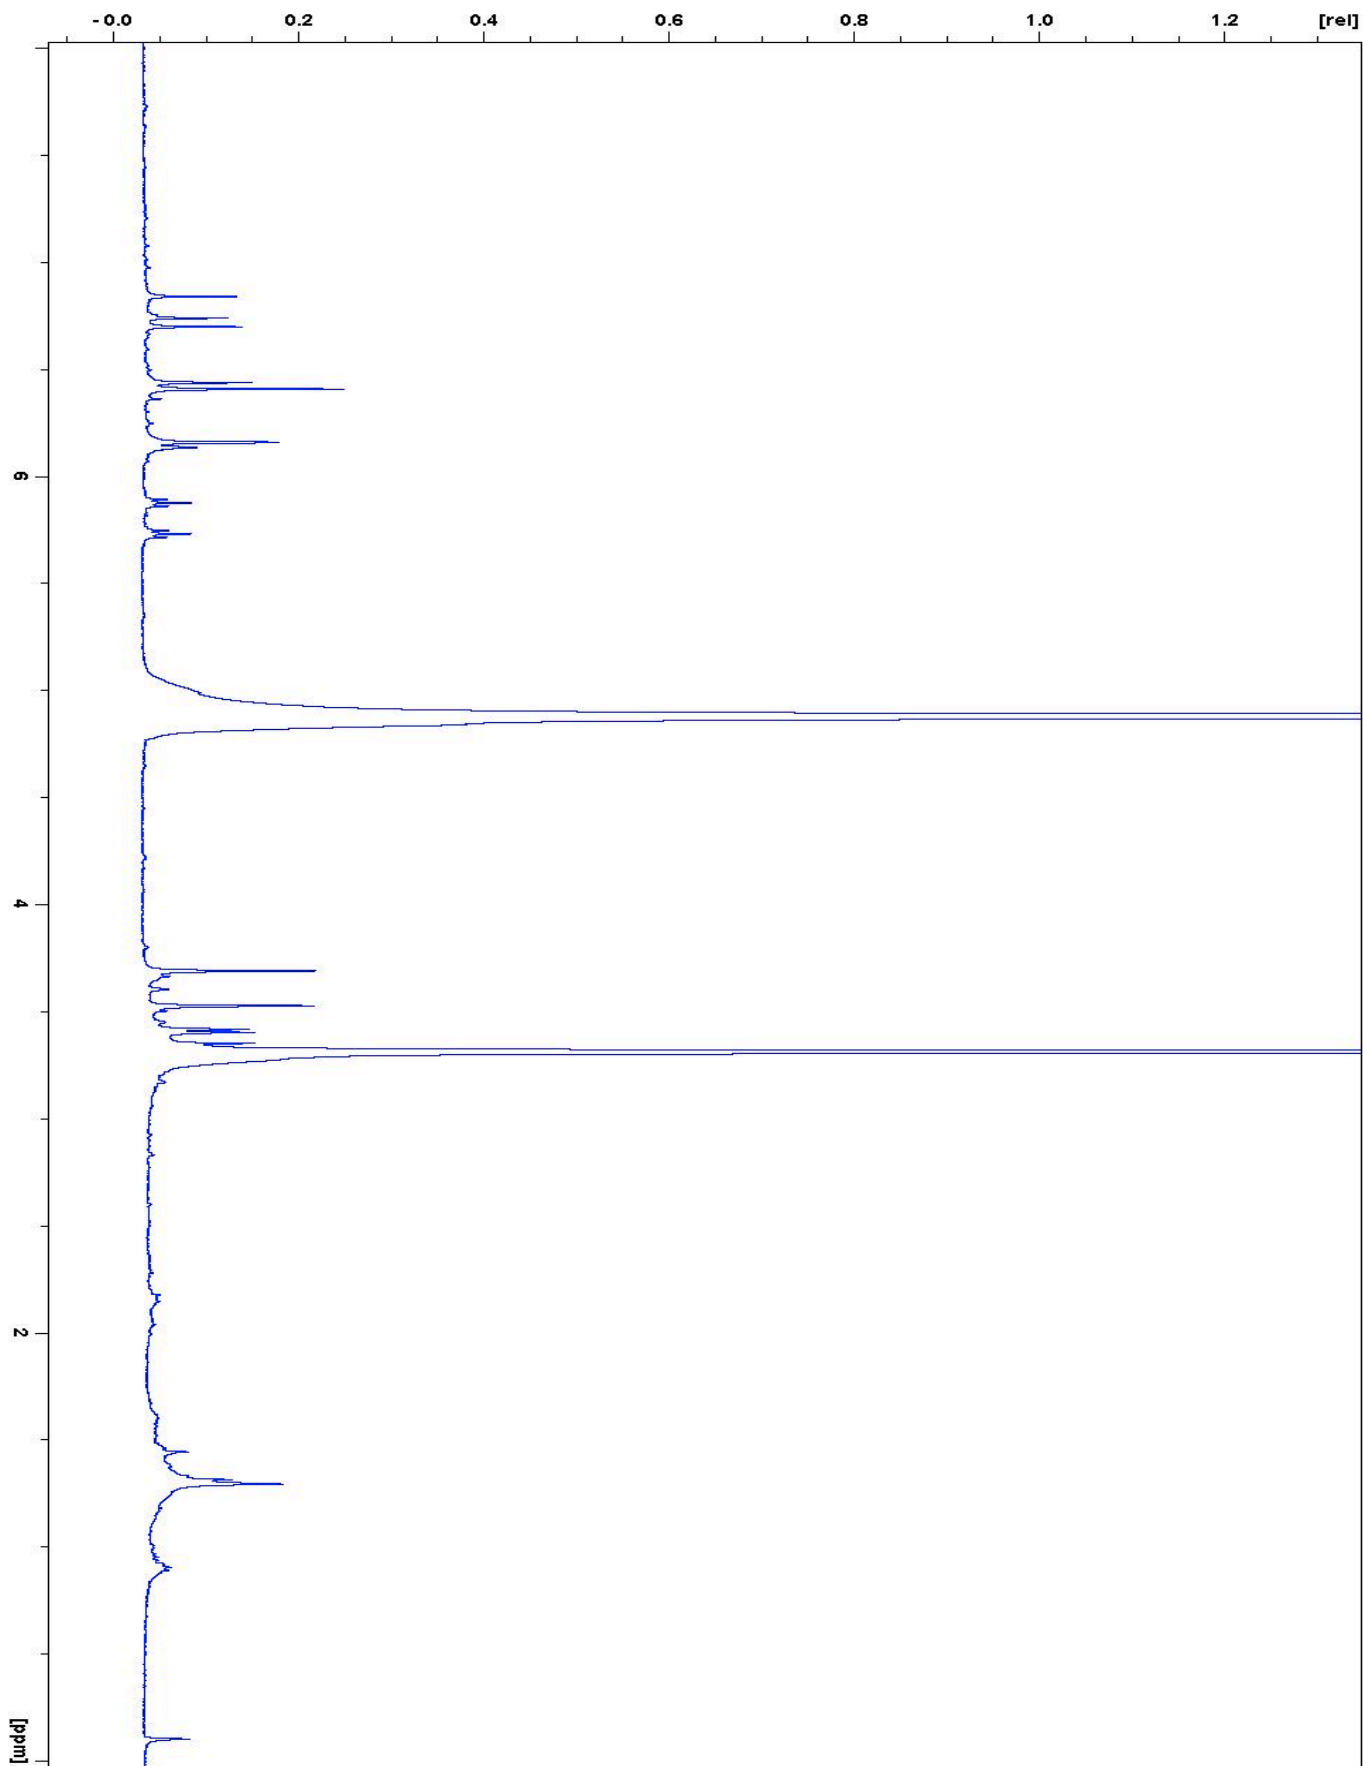

$^1\text{H}$  NMR spectrum of chrysophentin E (**5**) in  $\text{MeOD-}d_4$

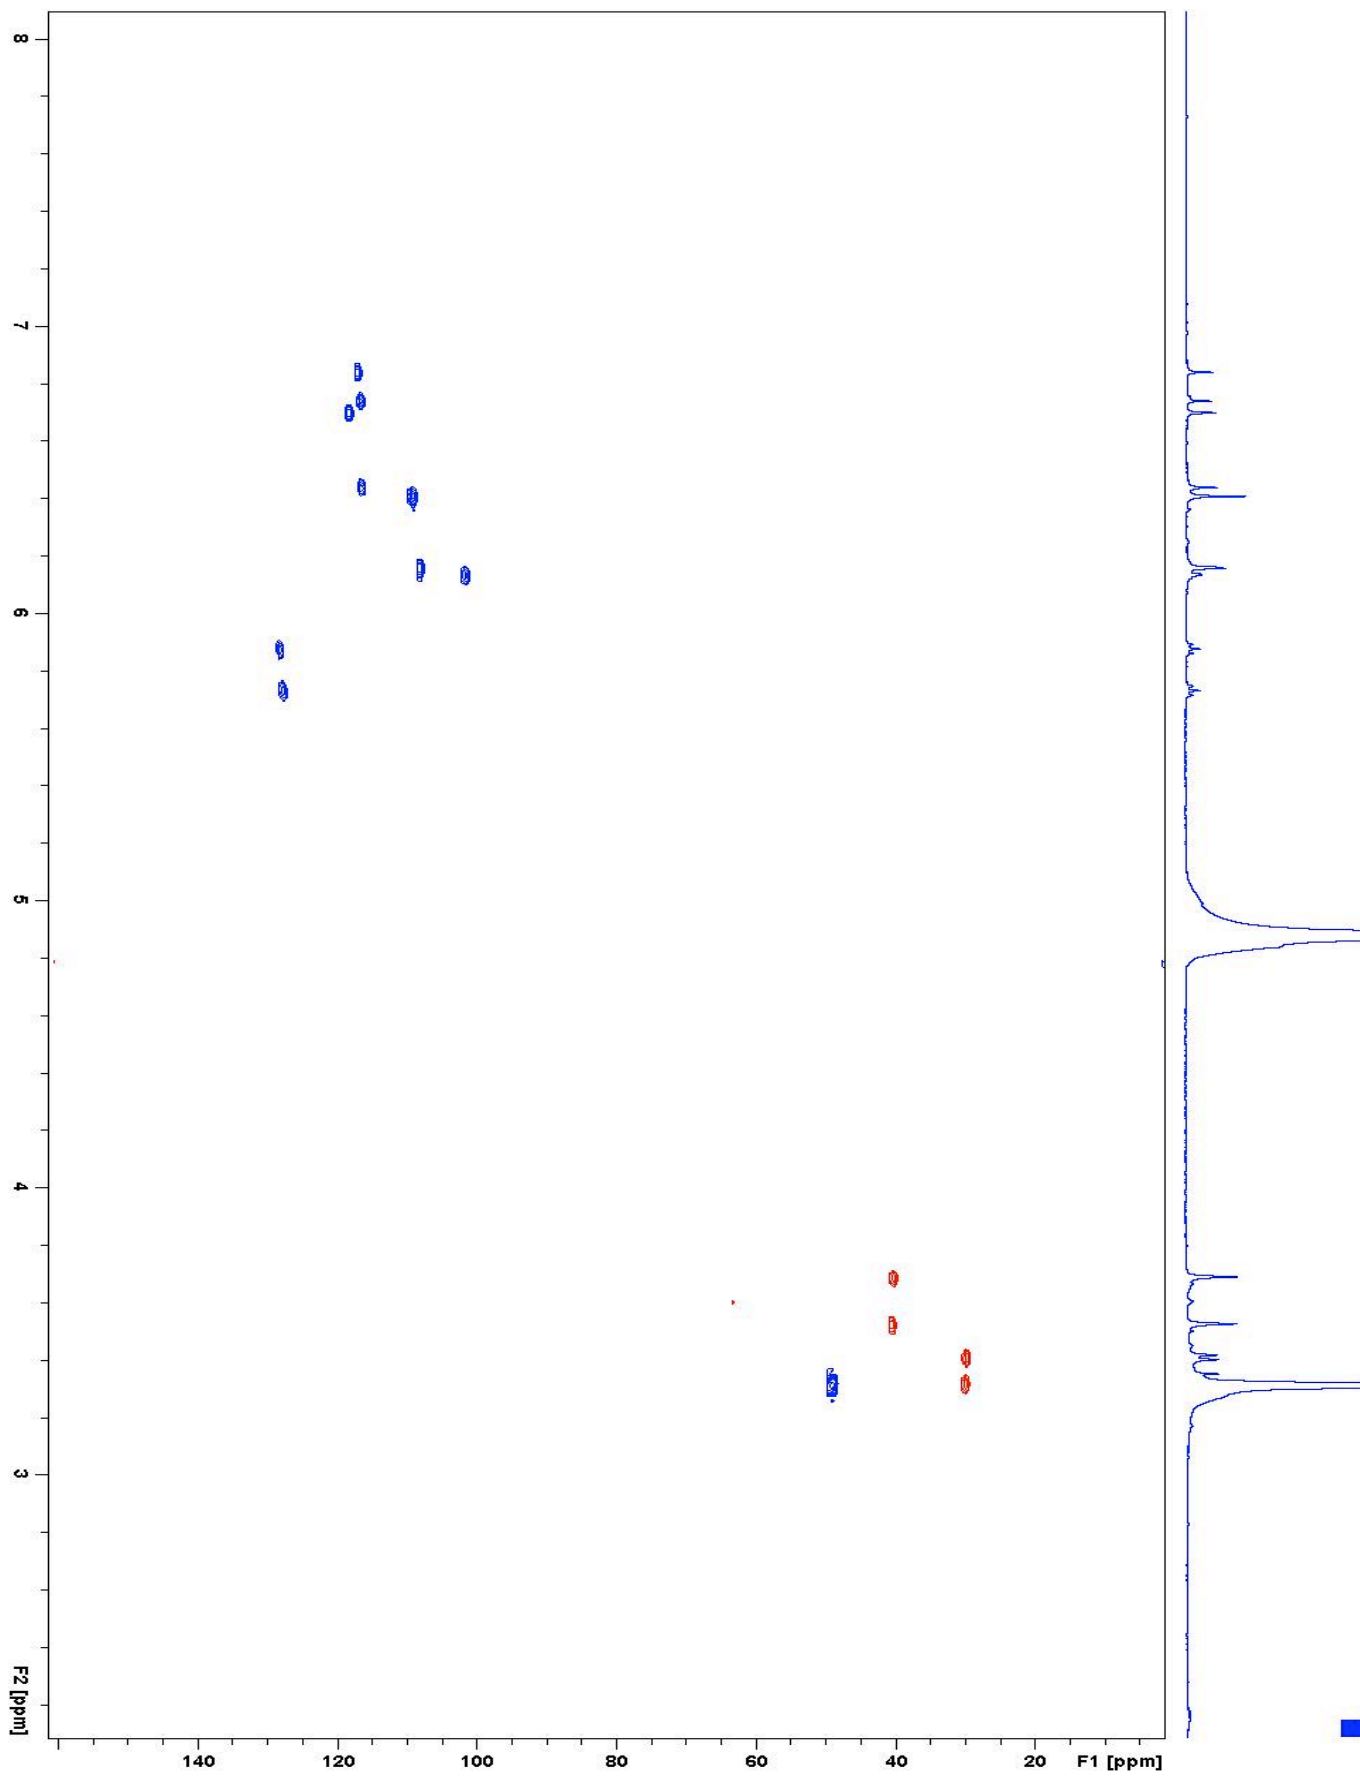

HSQC spectrum of chrysophenit E (5) in MeOD-*d*<sub>4</sub>

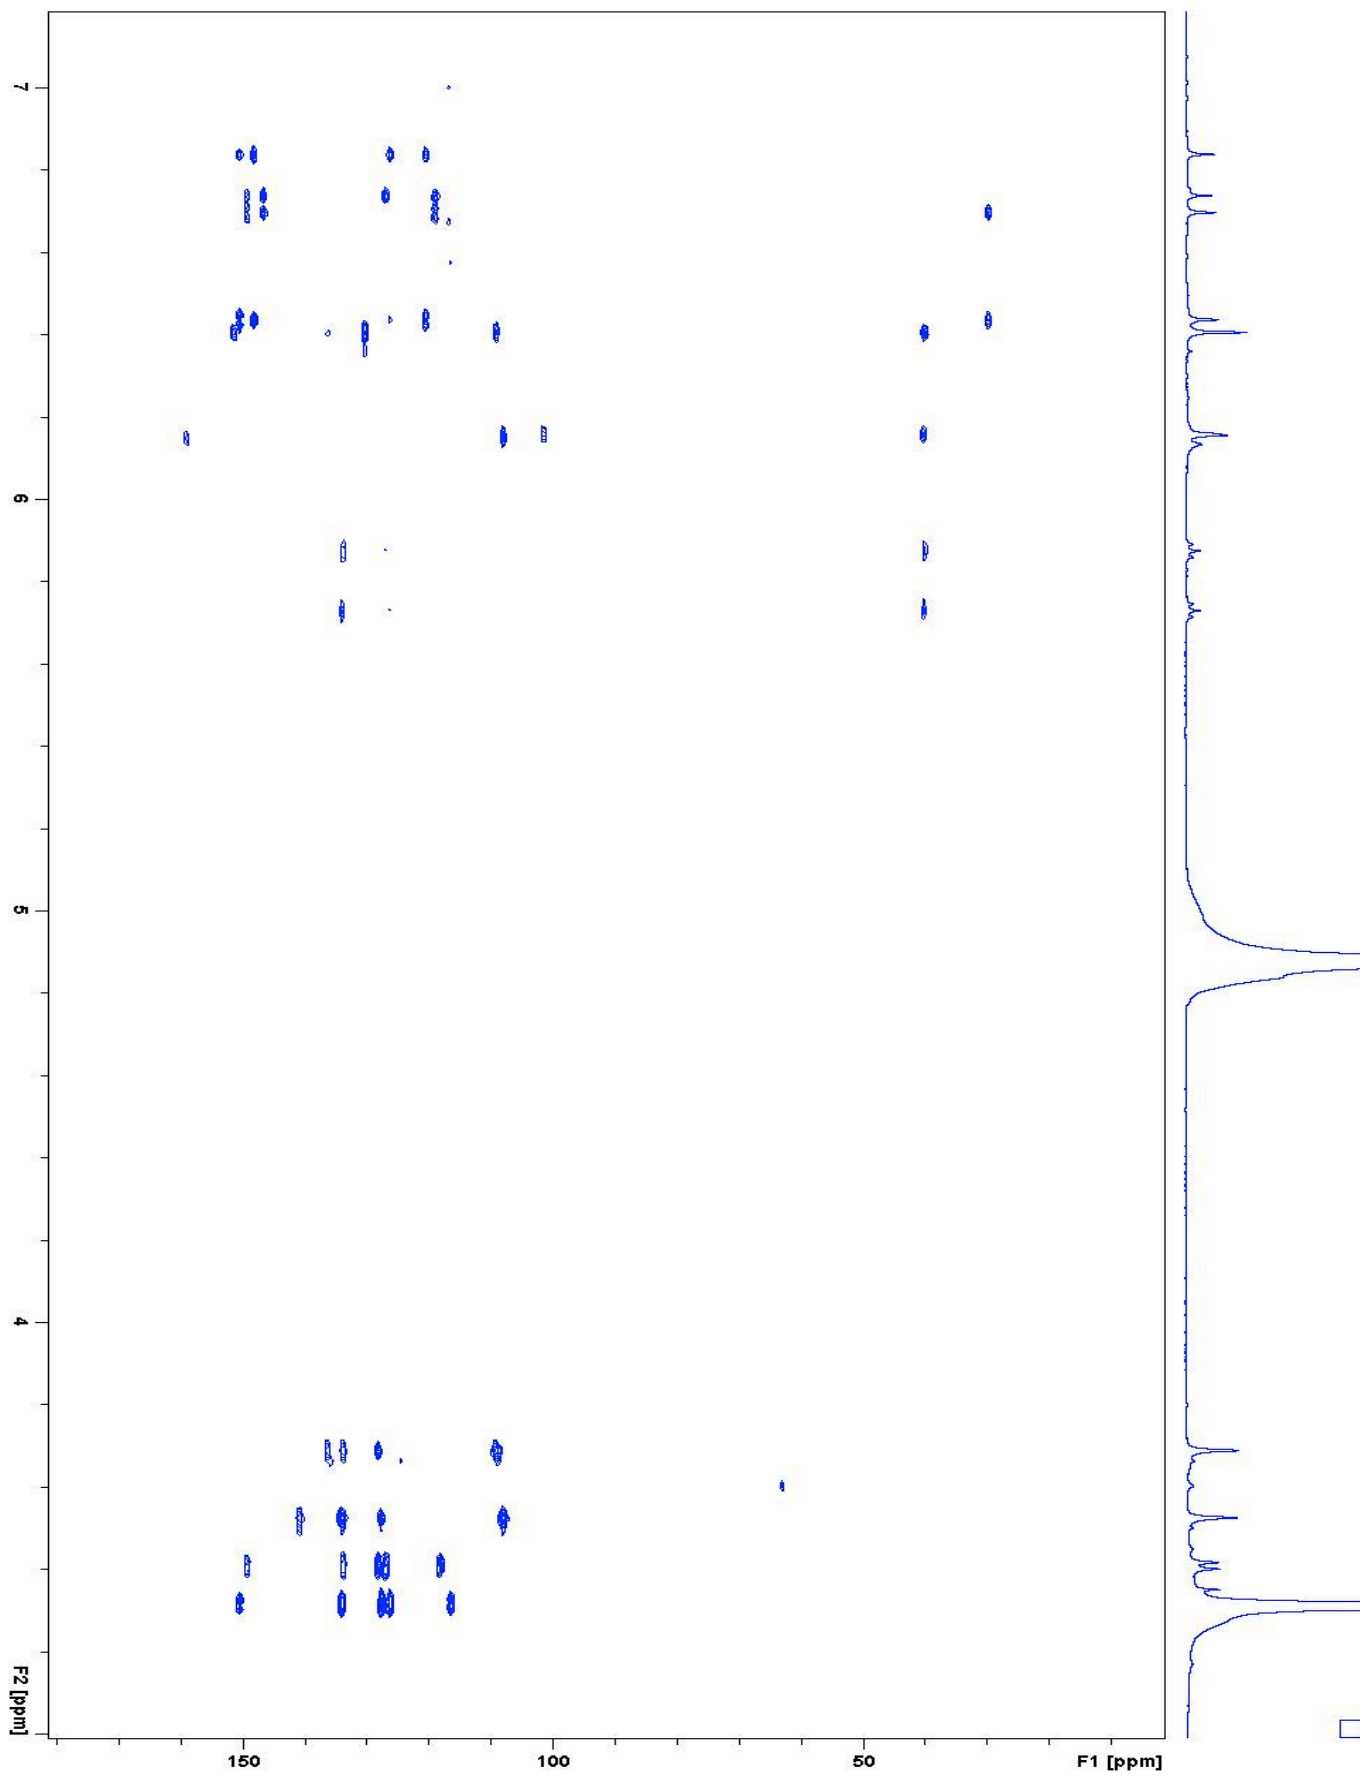

HMBC spectrum of chrysophentin E (**5**) in MeOD-*d*<sub>4</sub>

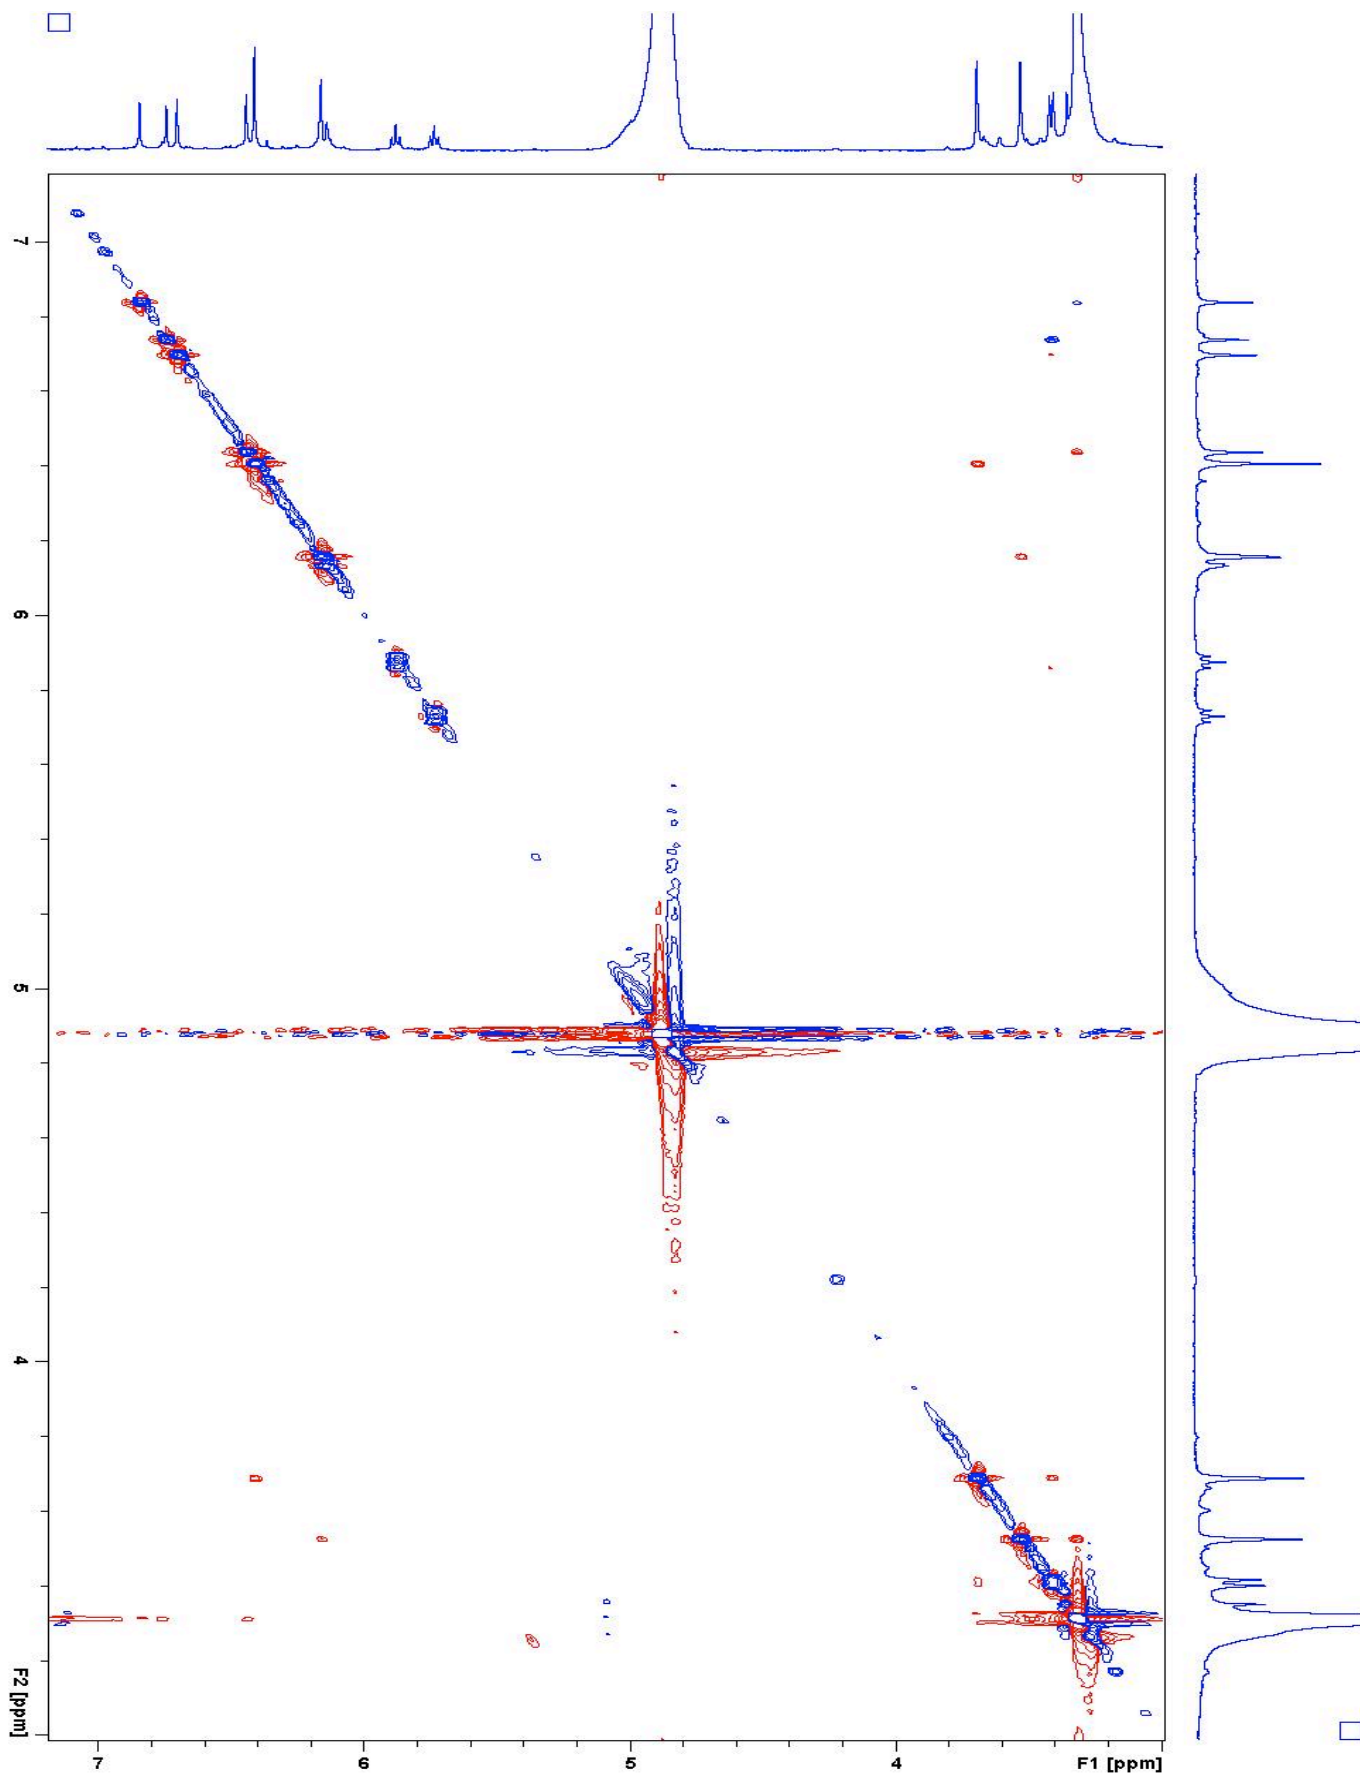

ROESY spectrum of chrysophentin E (**5**) in MeOD-*d*<sub>4</sub>



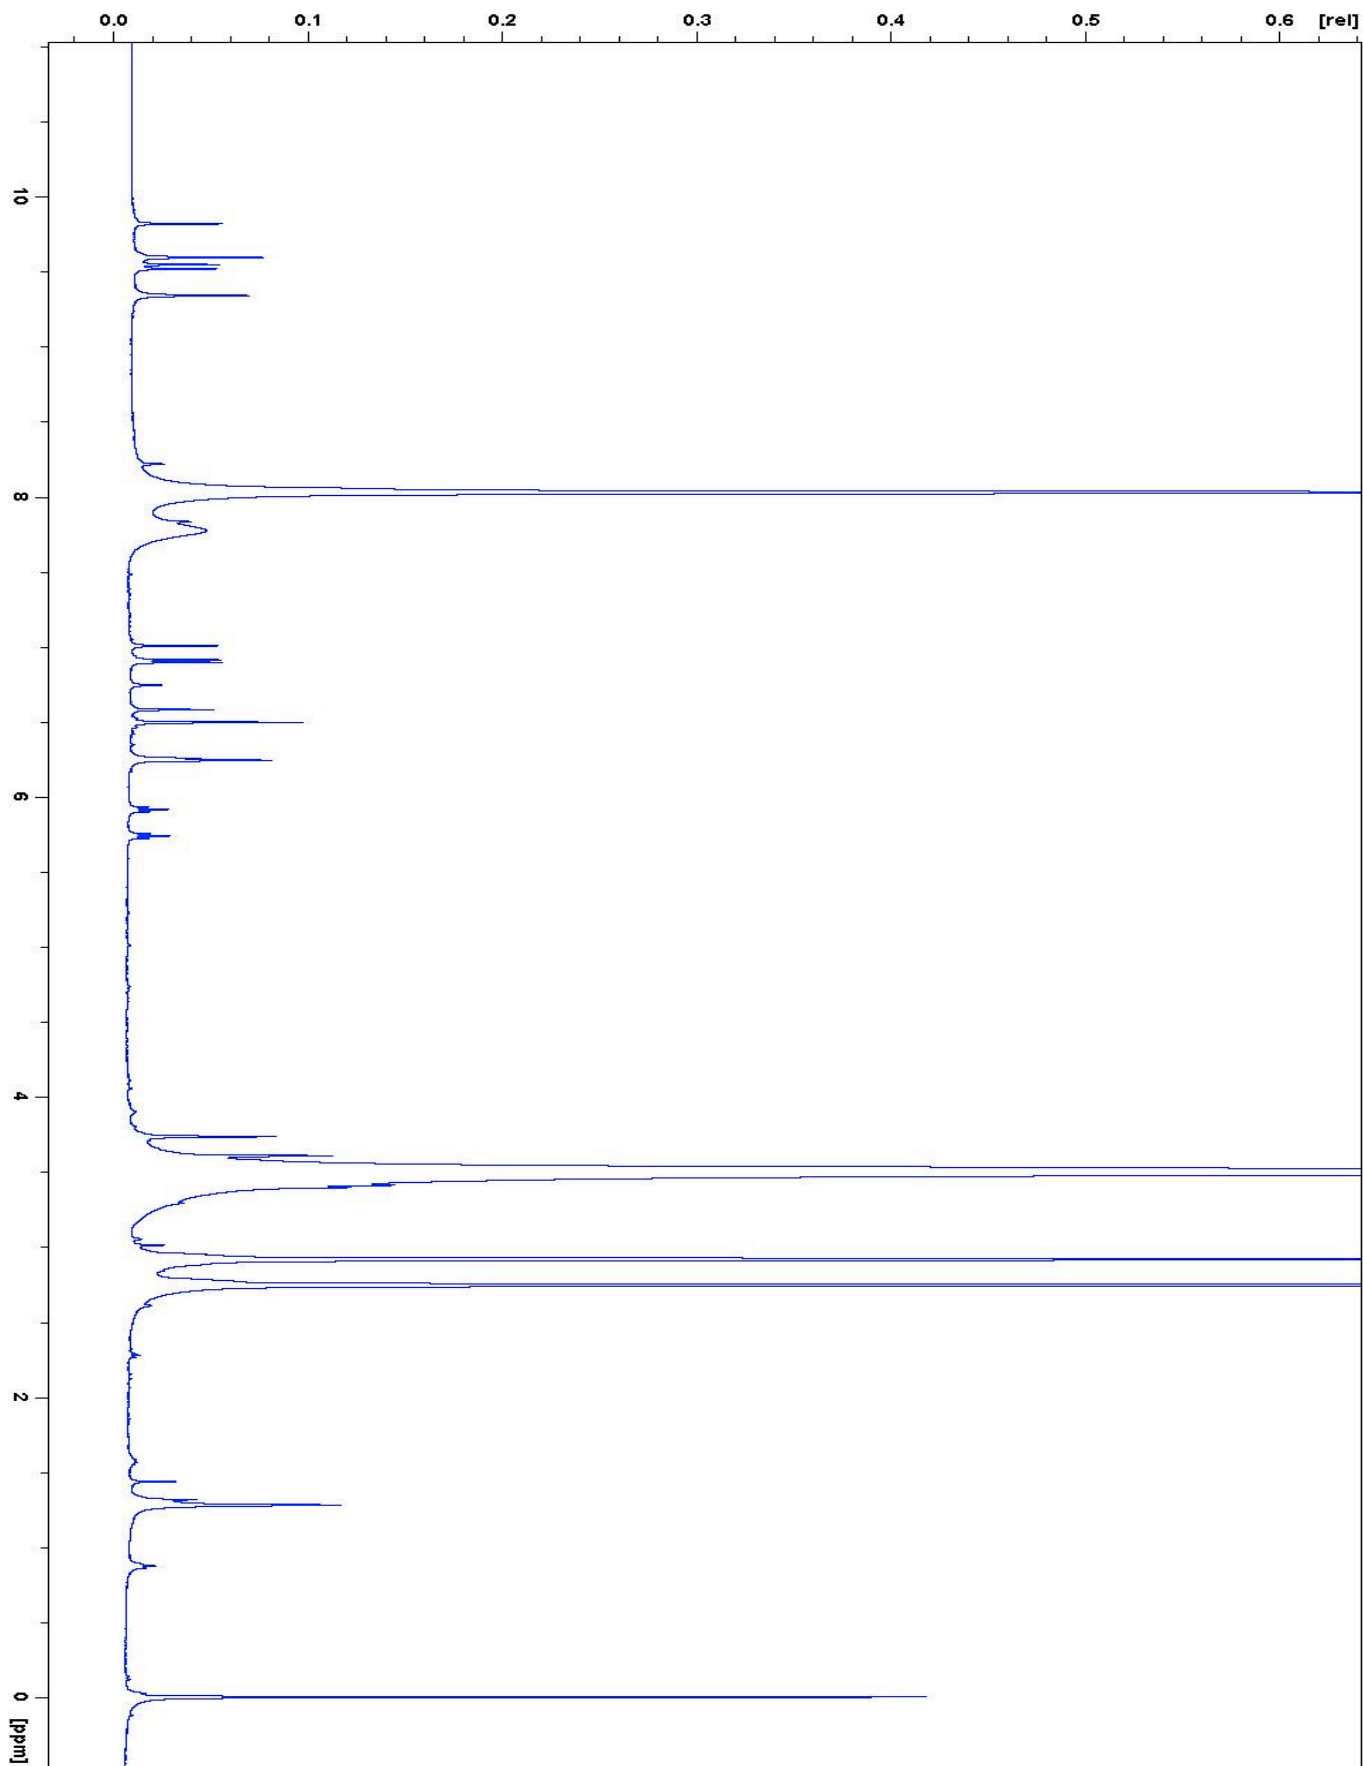

$^1\text{H}$  NMR spectrum of chrysophentin E (**5**) in  $\text{DMF-}d_7$

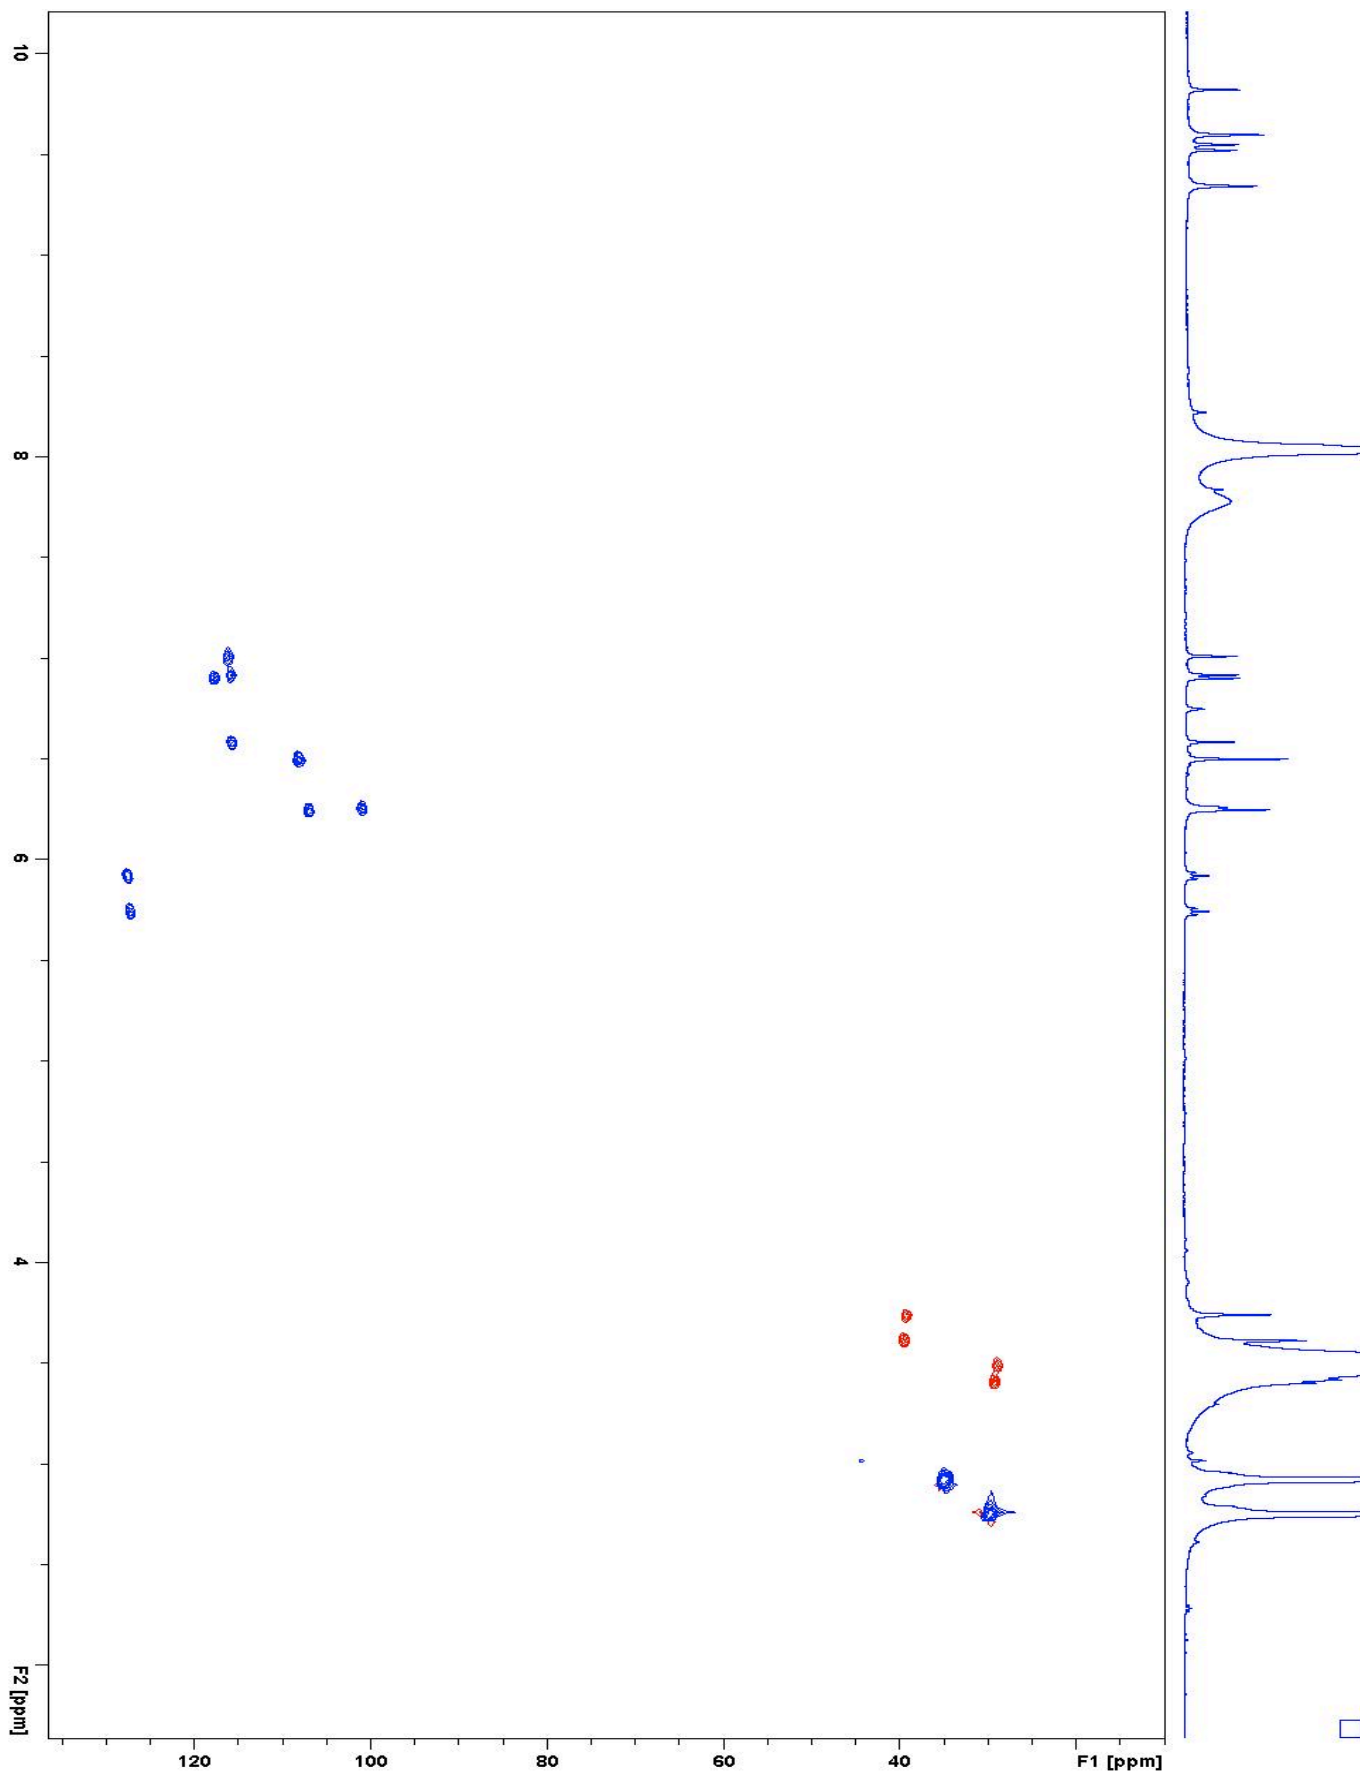

HSQC spectrum of chrysophentin E (**5**) in DMF-*d*<sub>7</sub>

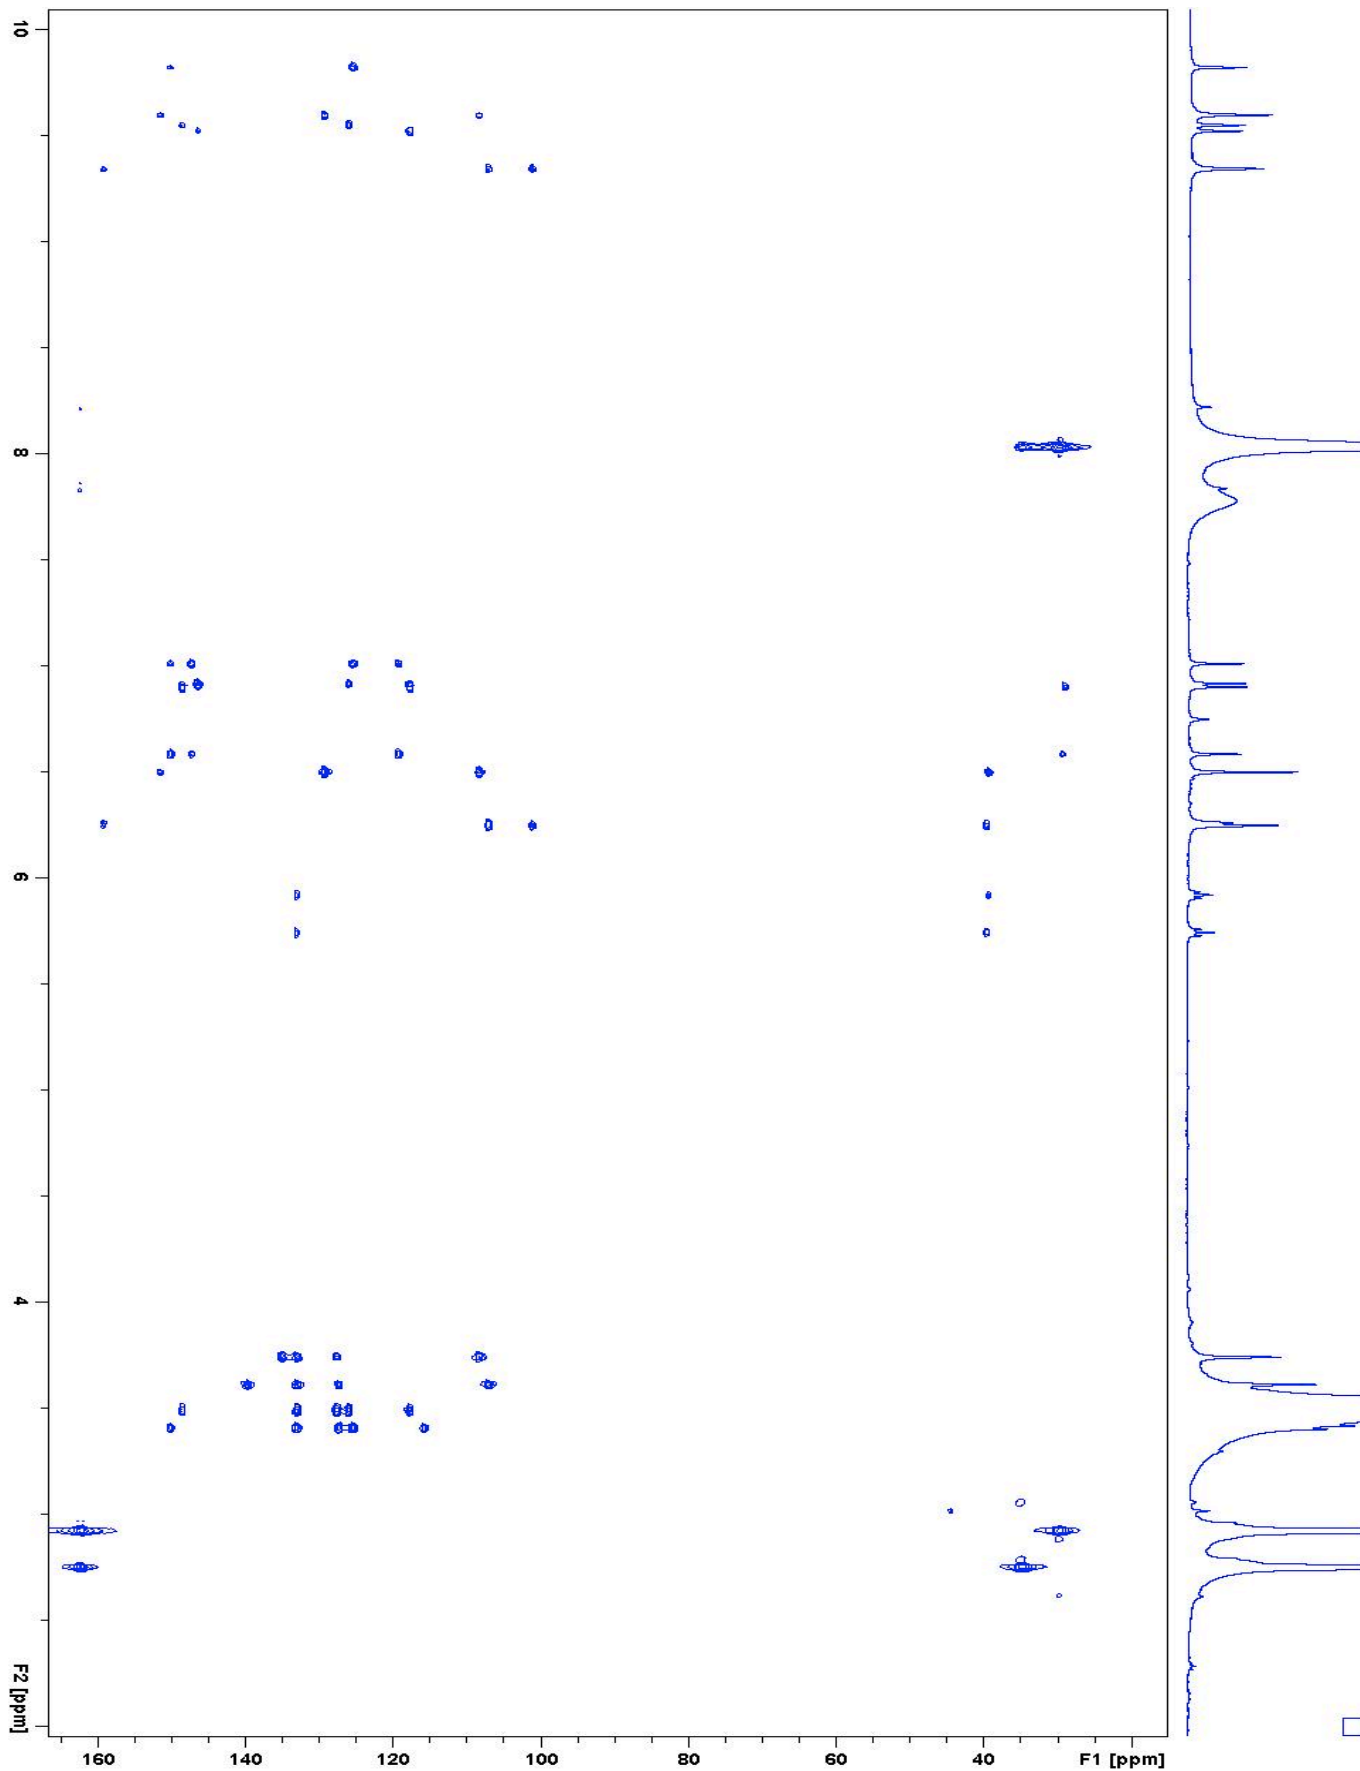

HMBC spectrum of chrysophentin E (**5**) in DMF-*d*<sub>7</sub>

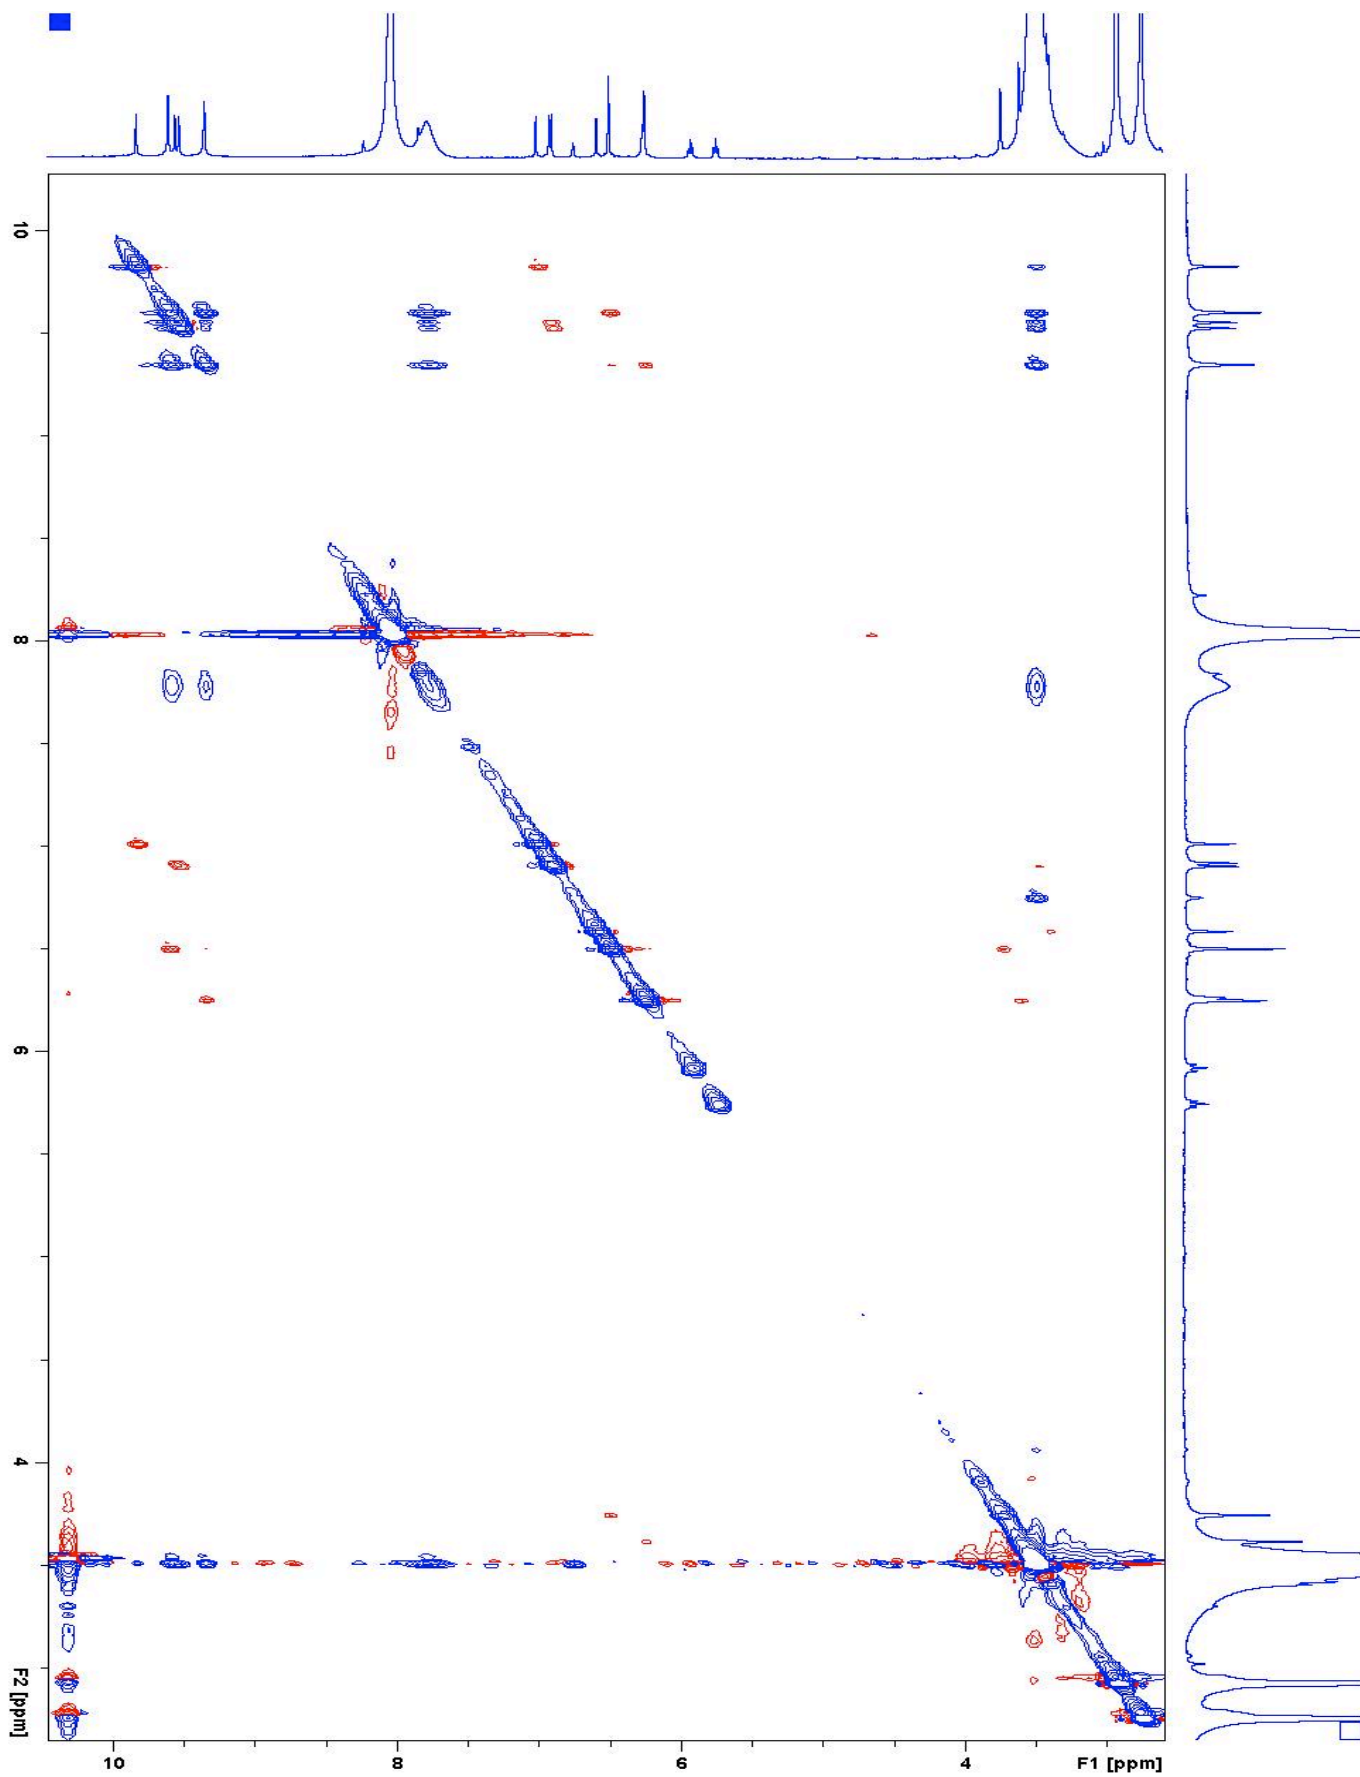

ROESY spectrum of chrysophentin E (**5**) in DMF-*d*<sub>7</sub>

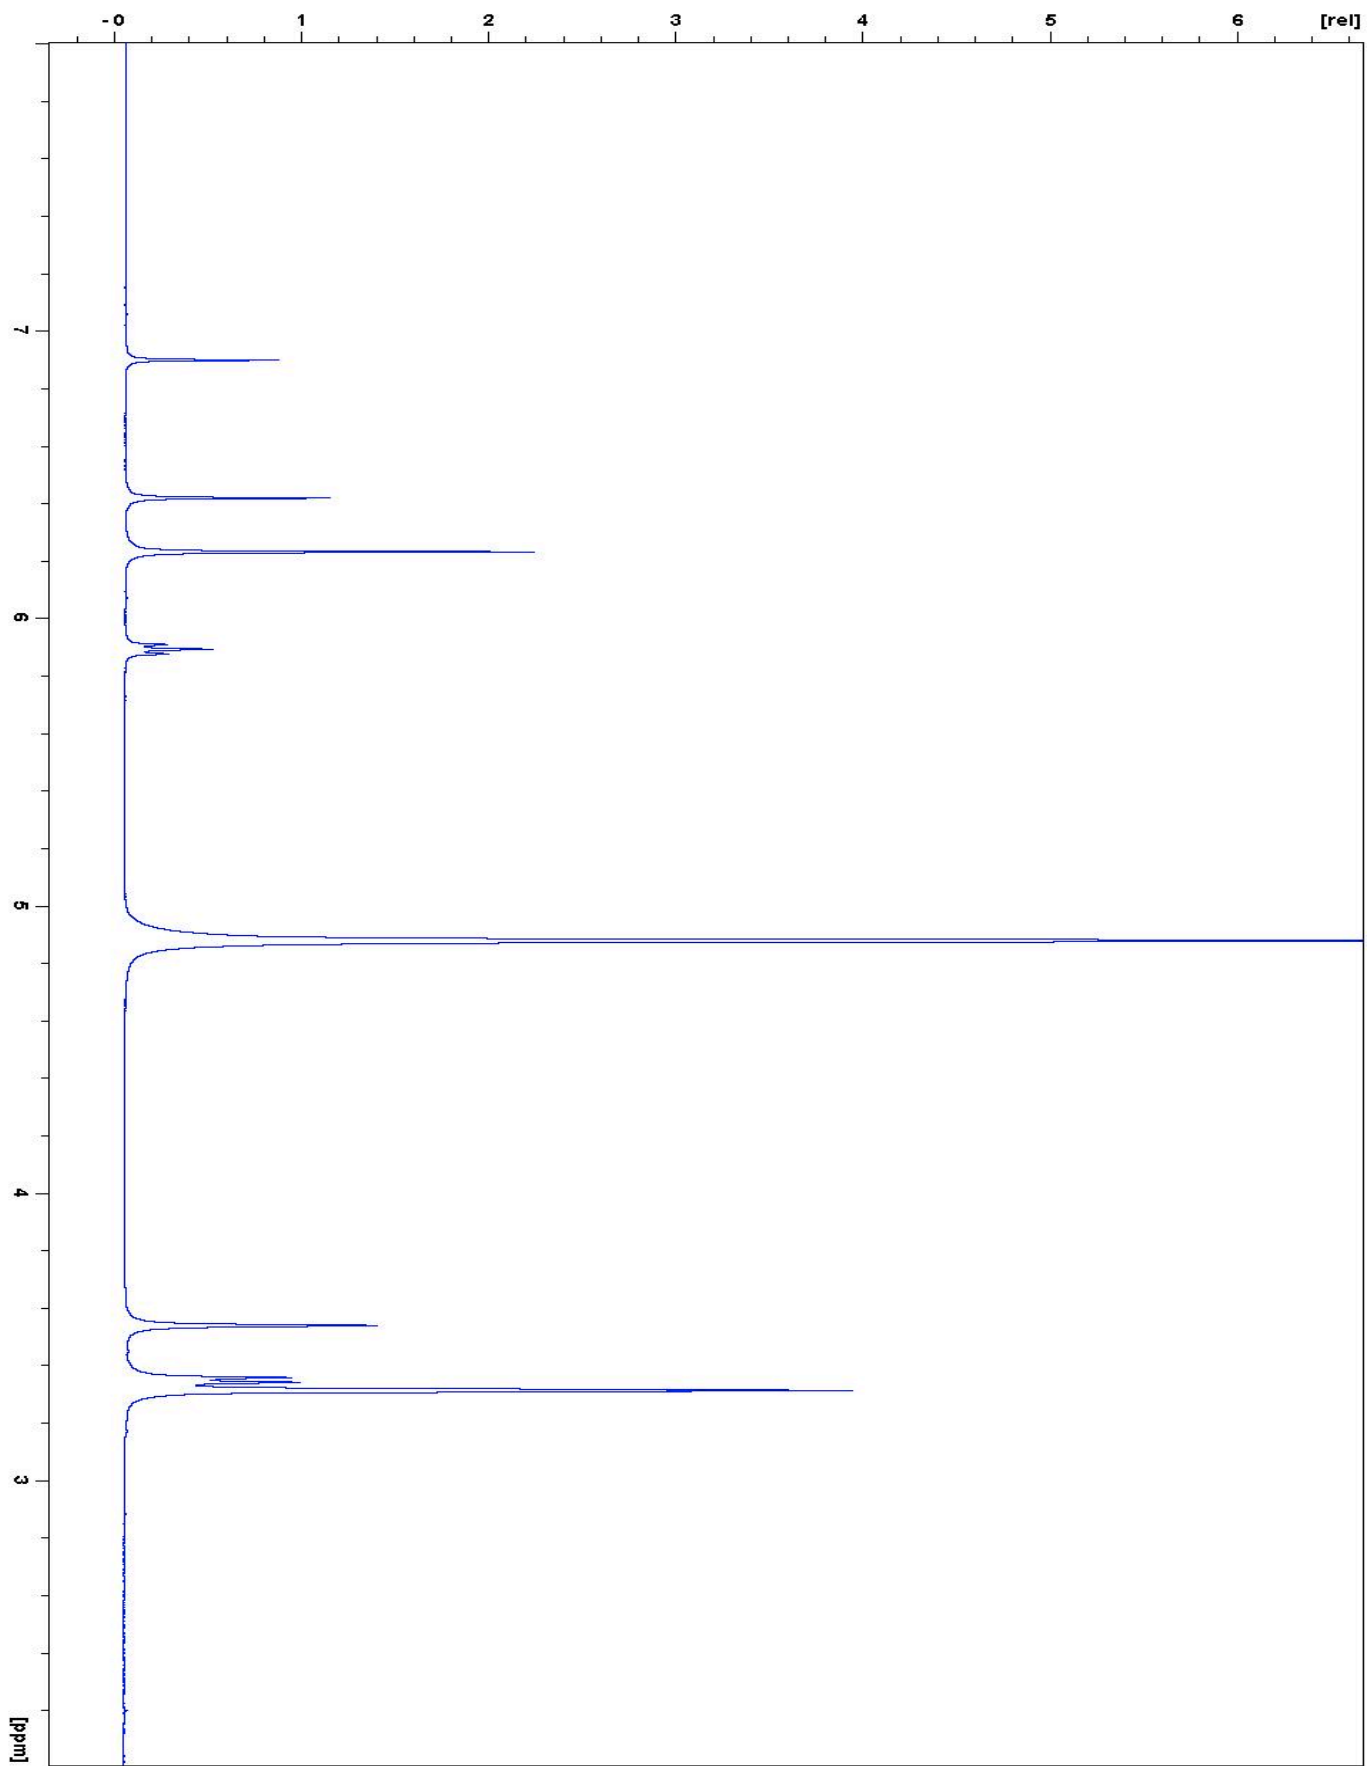

$^1\text{H}$  NMR spectrum of chrysophentin F (**6**) in  $\text{MeOD-}d_4$

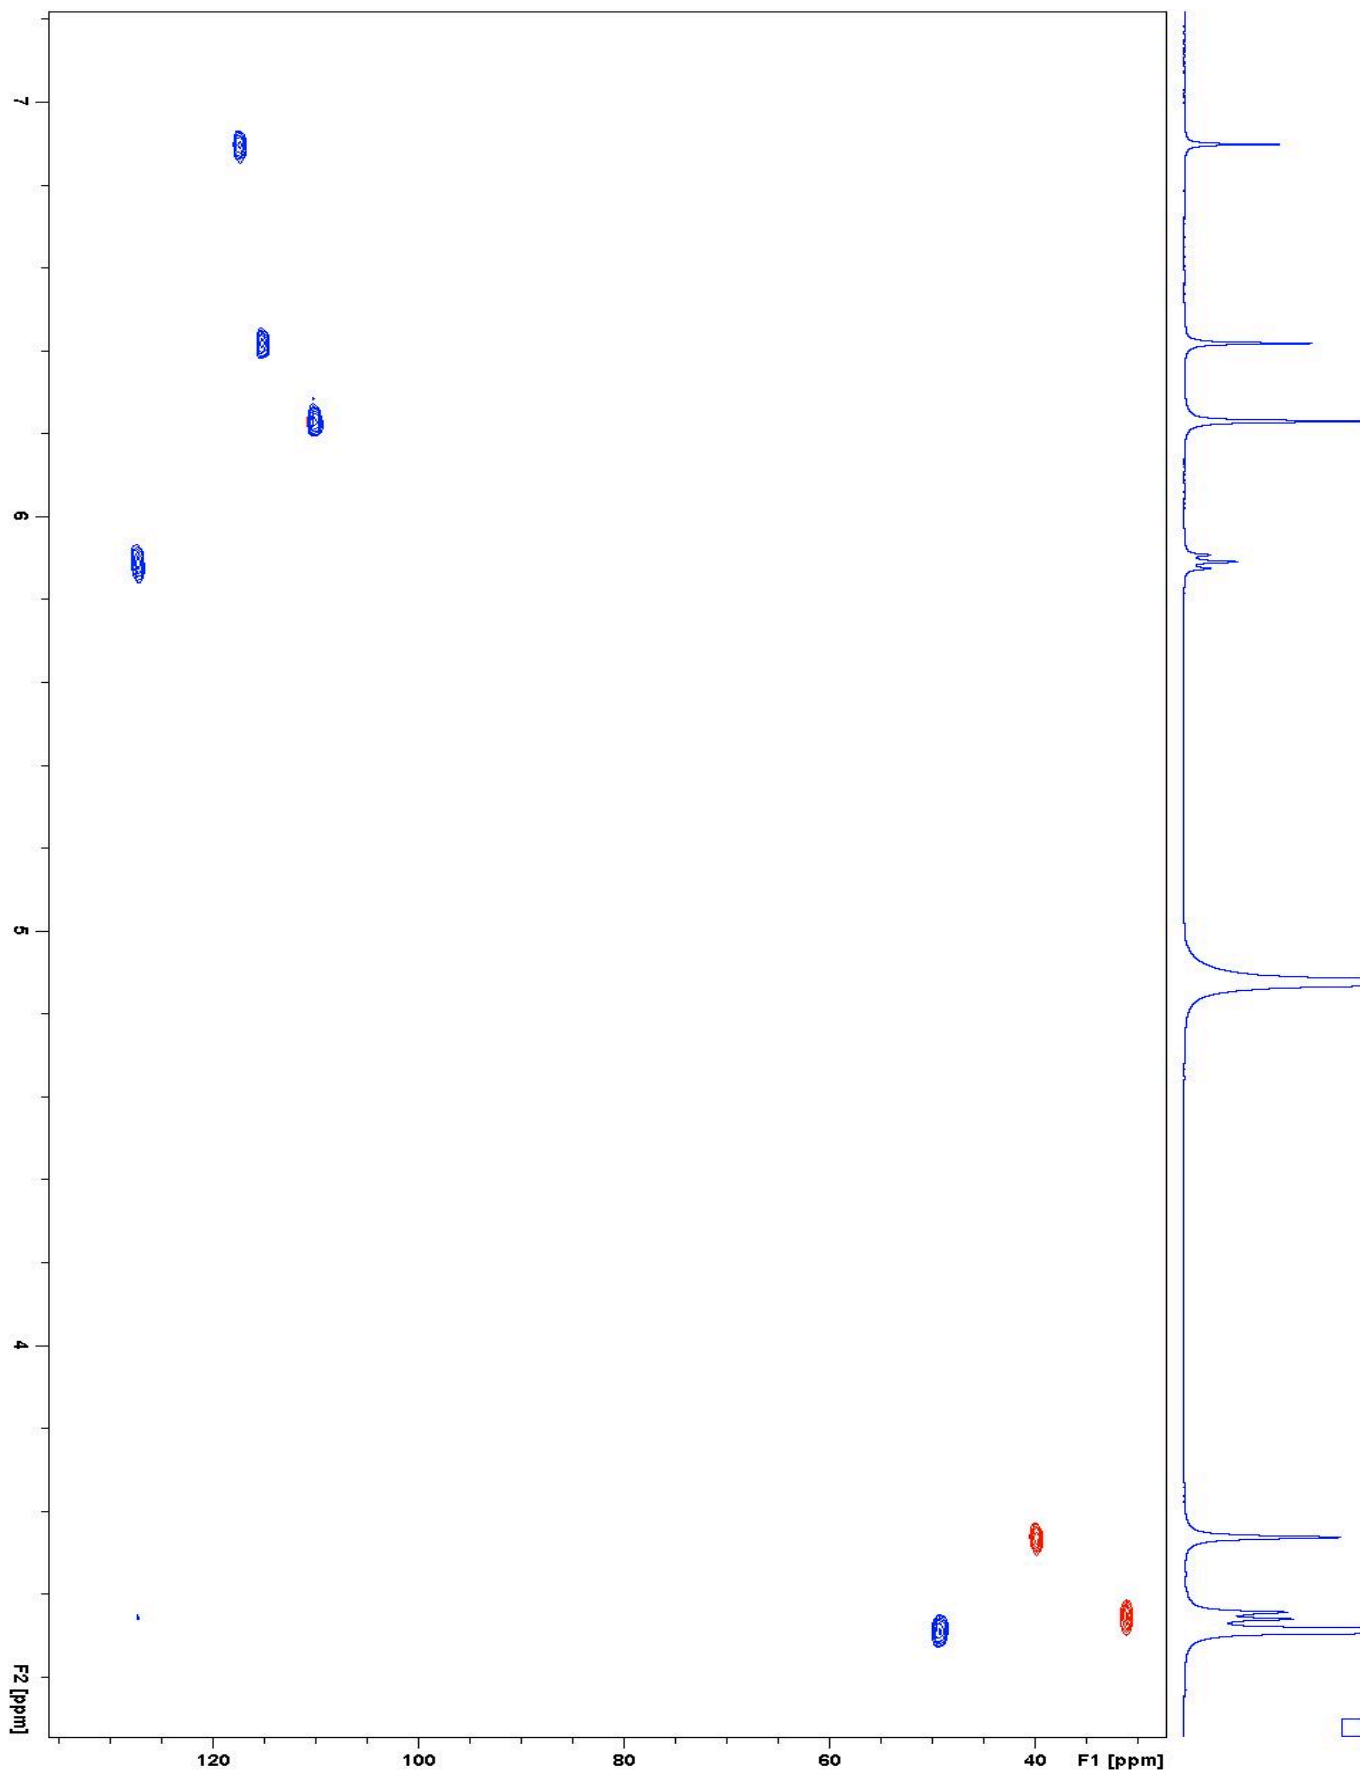

HSQC spectrum of chrysophentin F (**6**) in MeOD-*d*<sub>4</sub>

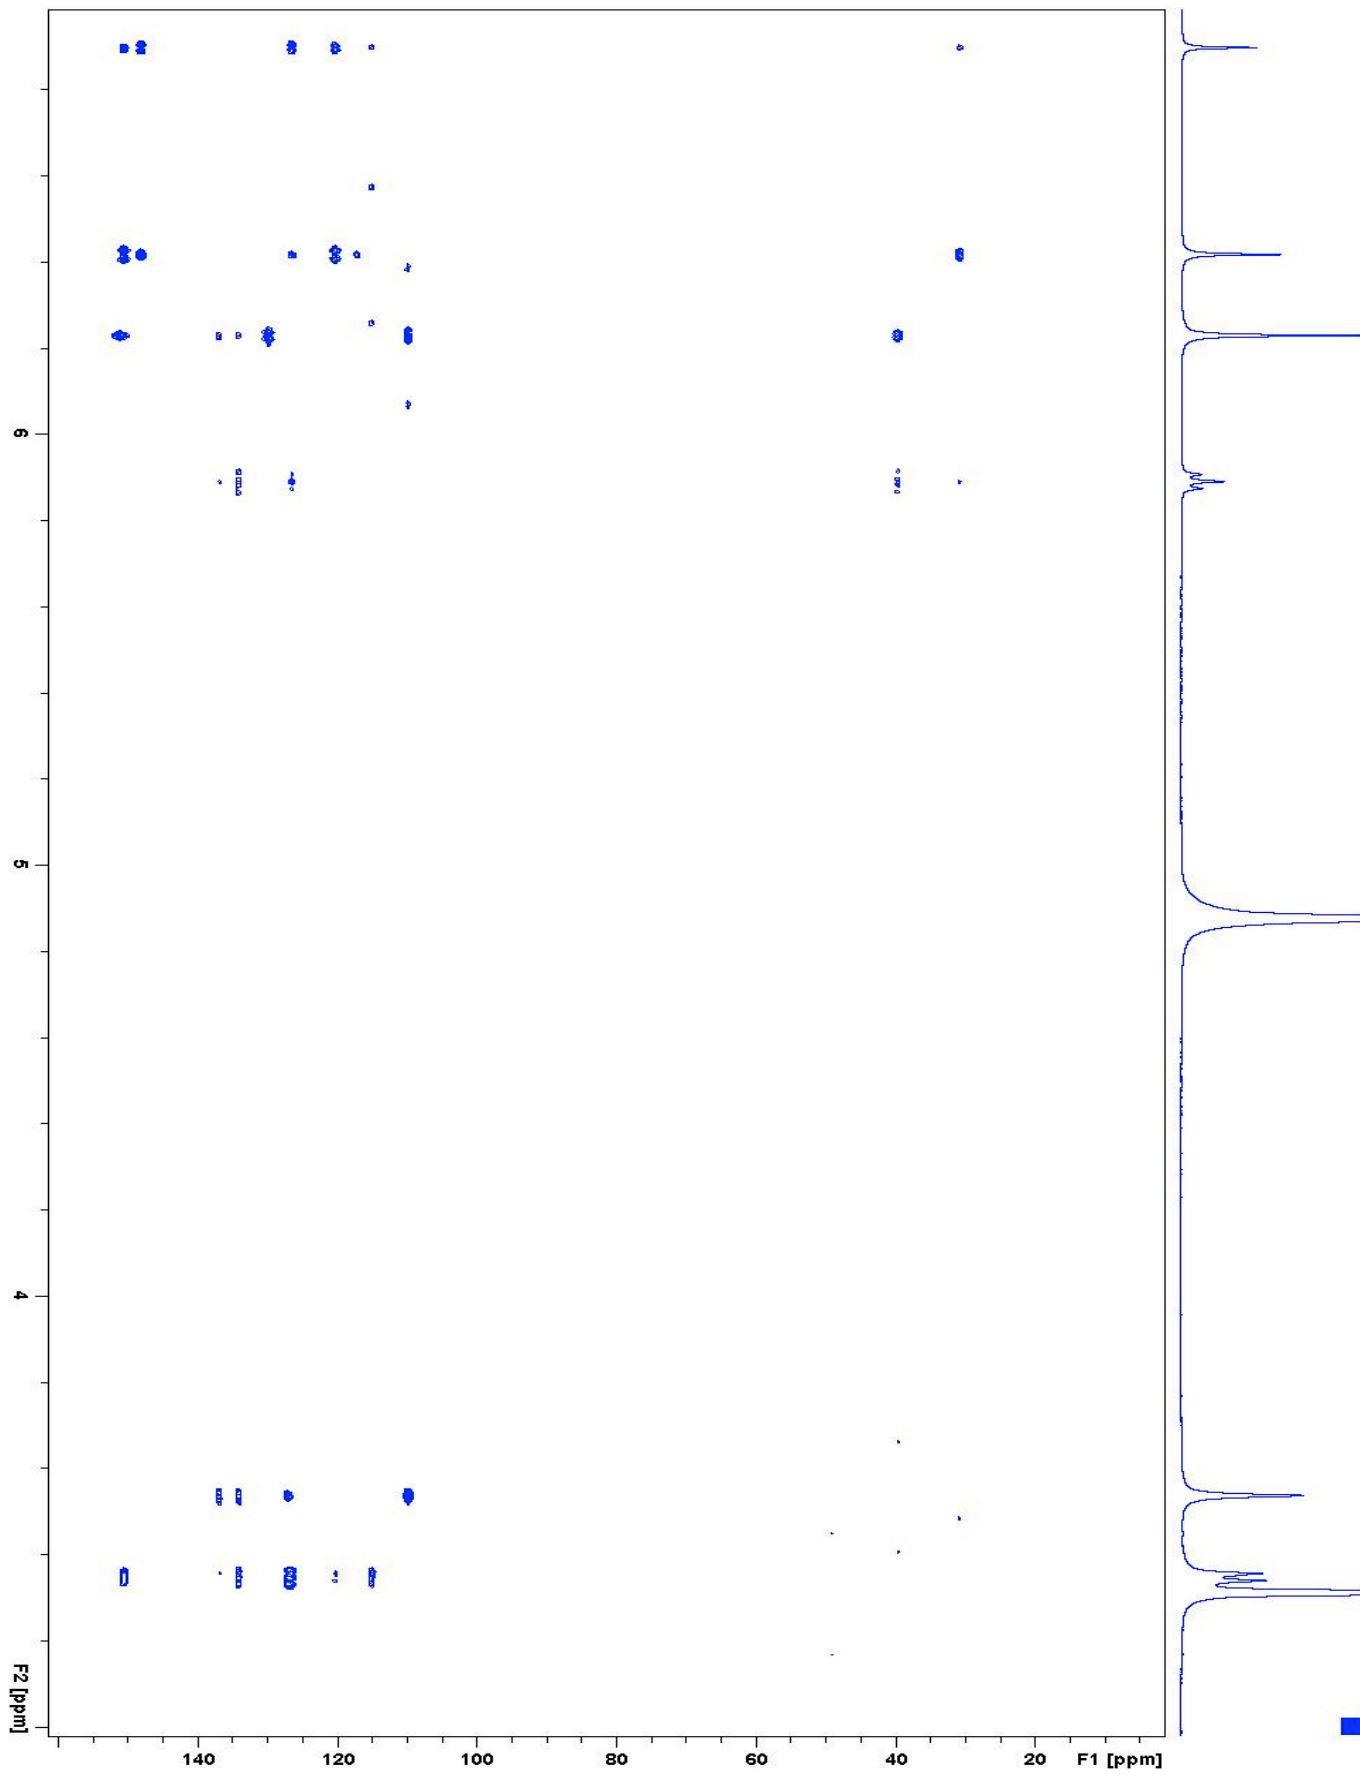

HMBC spectrum of chrysophentin F (**6**) in MeOD-*d*<sub>4</sub>

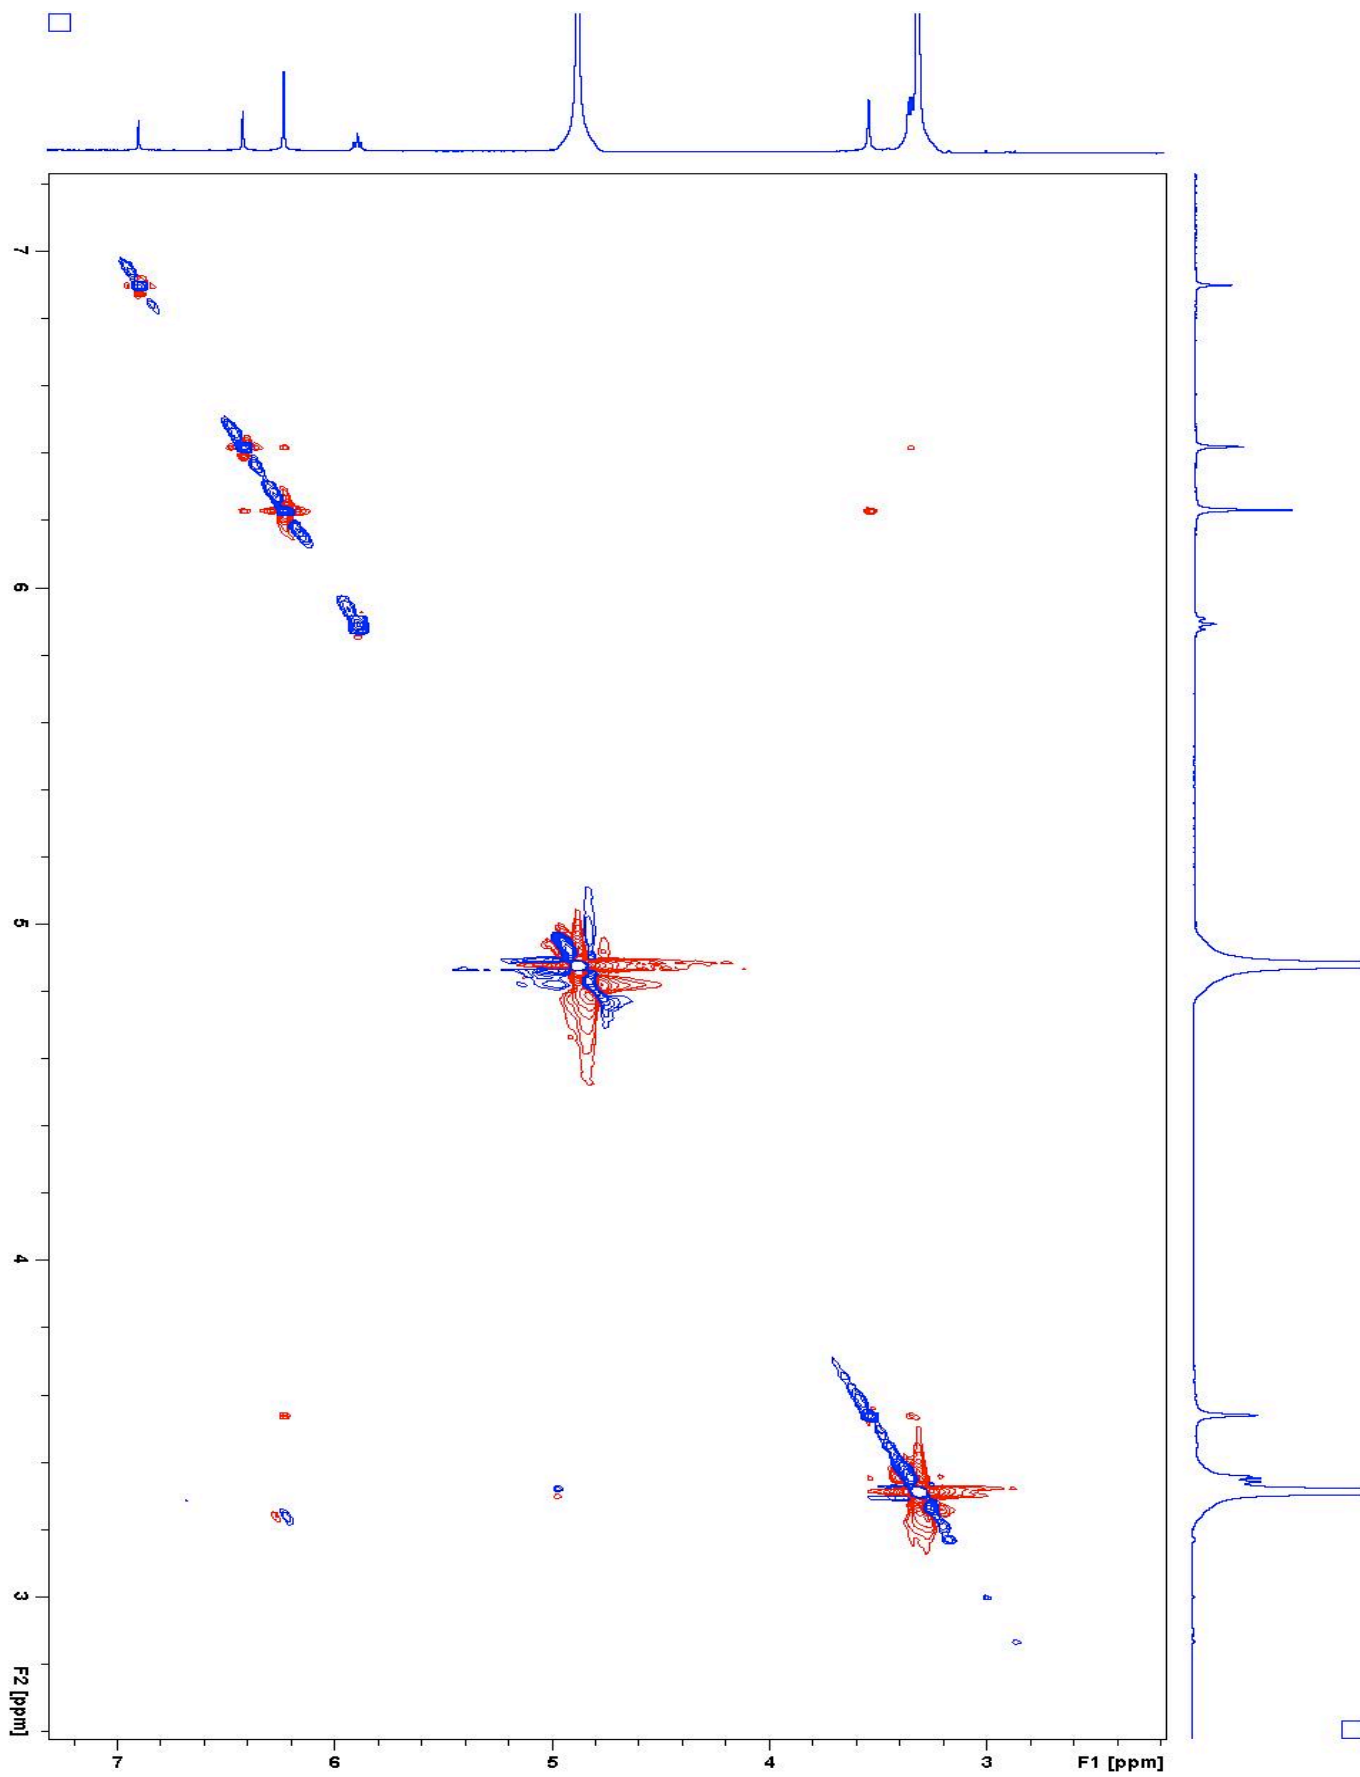

ROESY spectrum of chrysothentins F (**6**) in MeOD- $d_4$



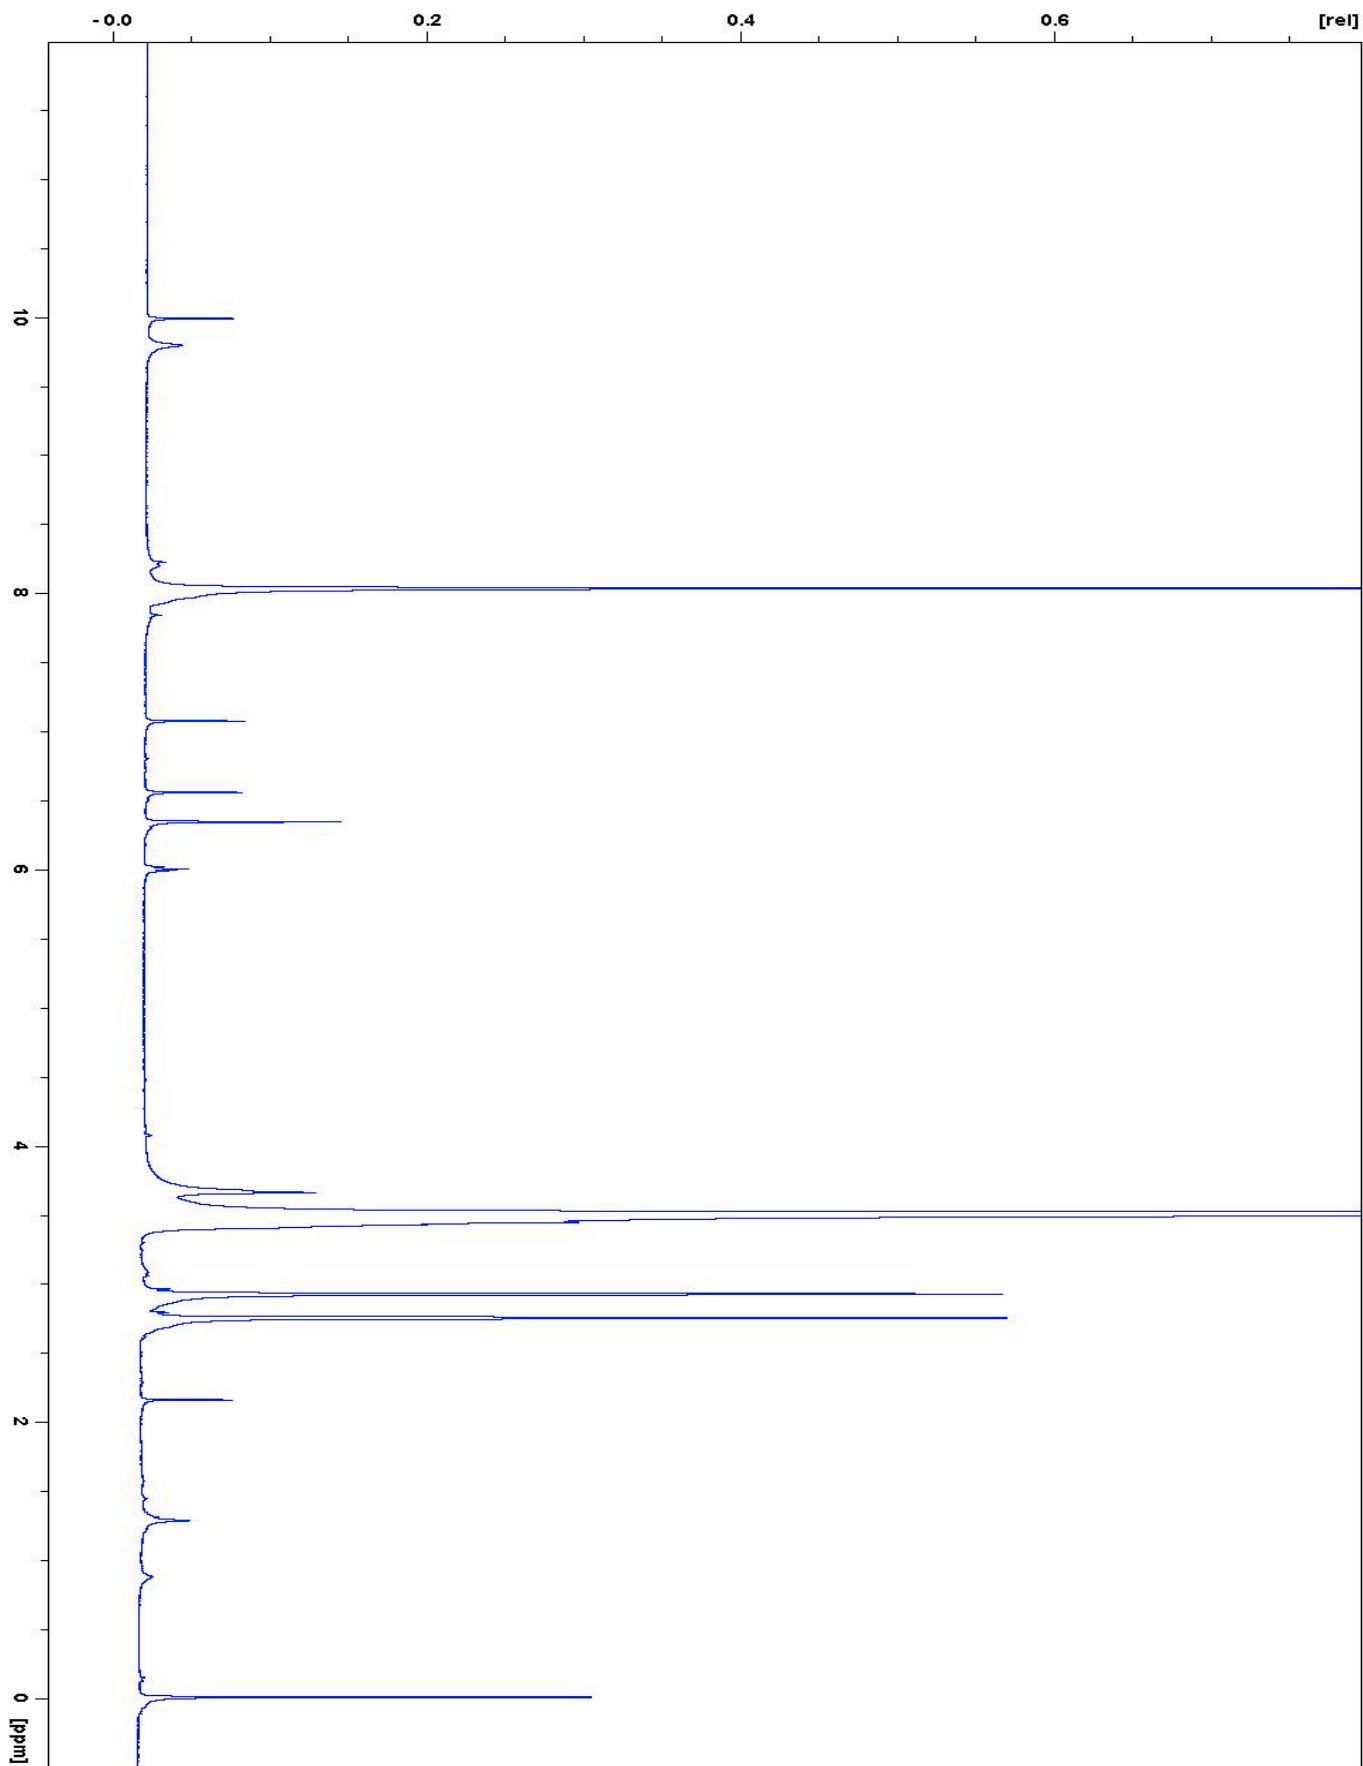

$^1\text{H}$  NMR spectrum of chrysophentin F (**6**) in  $\text{DMF-}d_7$

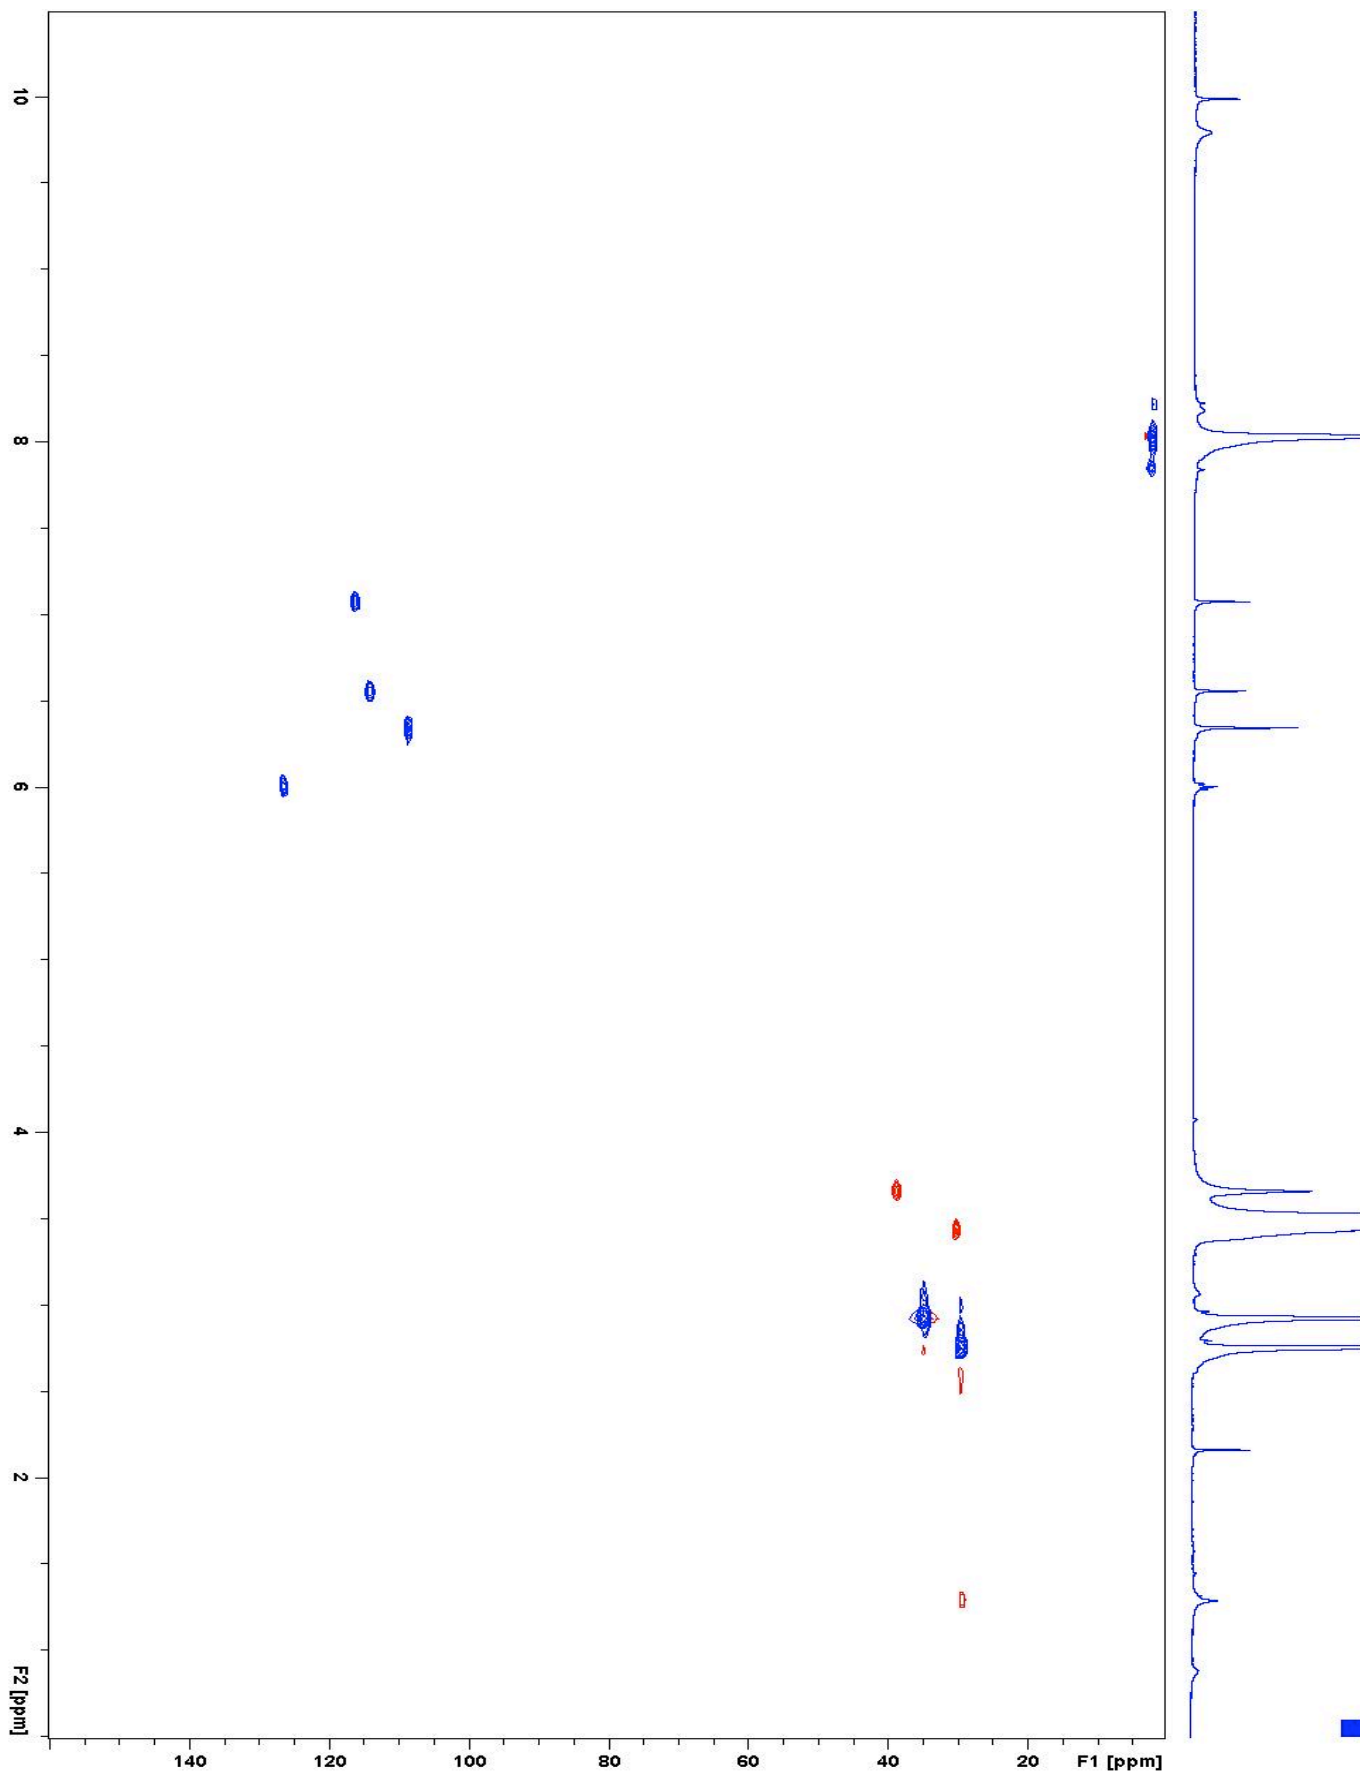

HSQC spectrum of chrysophentin F (**6**) in DMF-*d*<sub>7</sub>

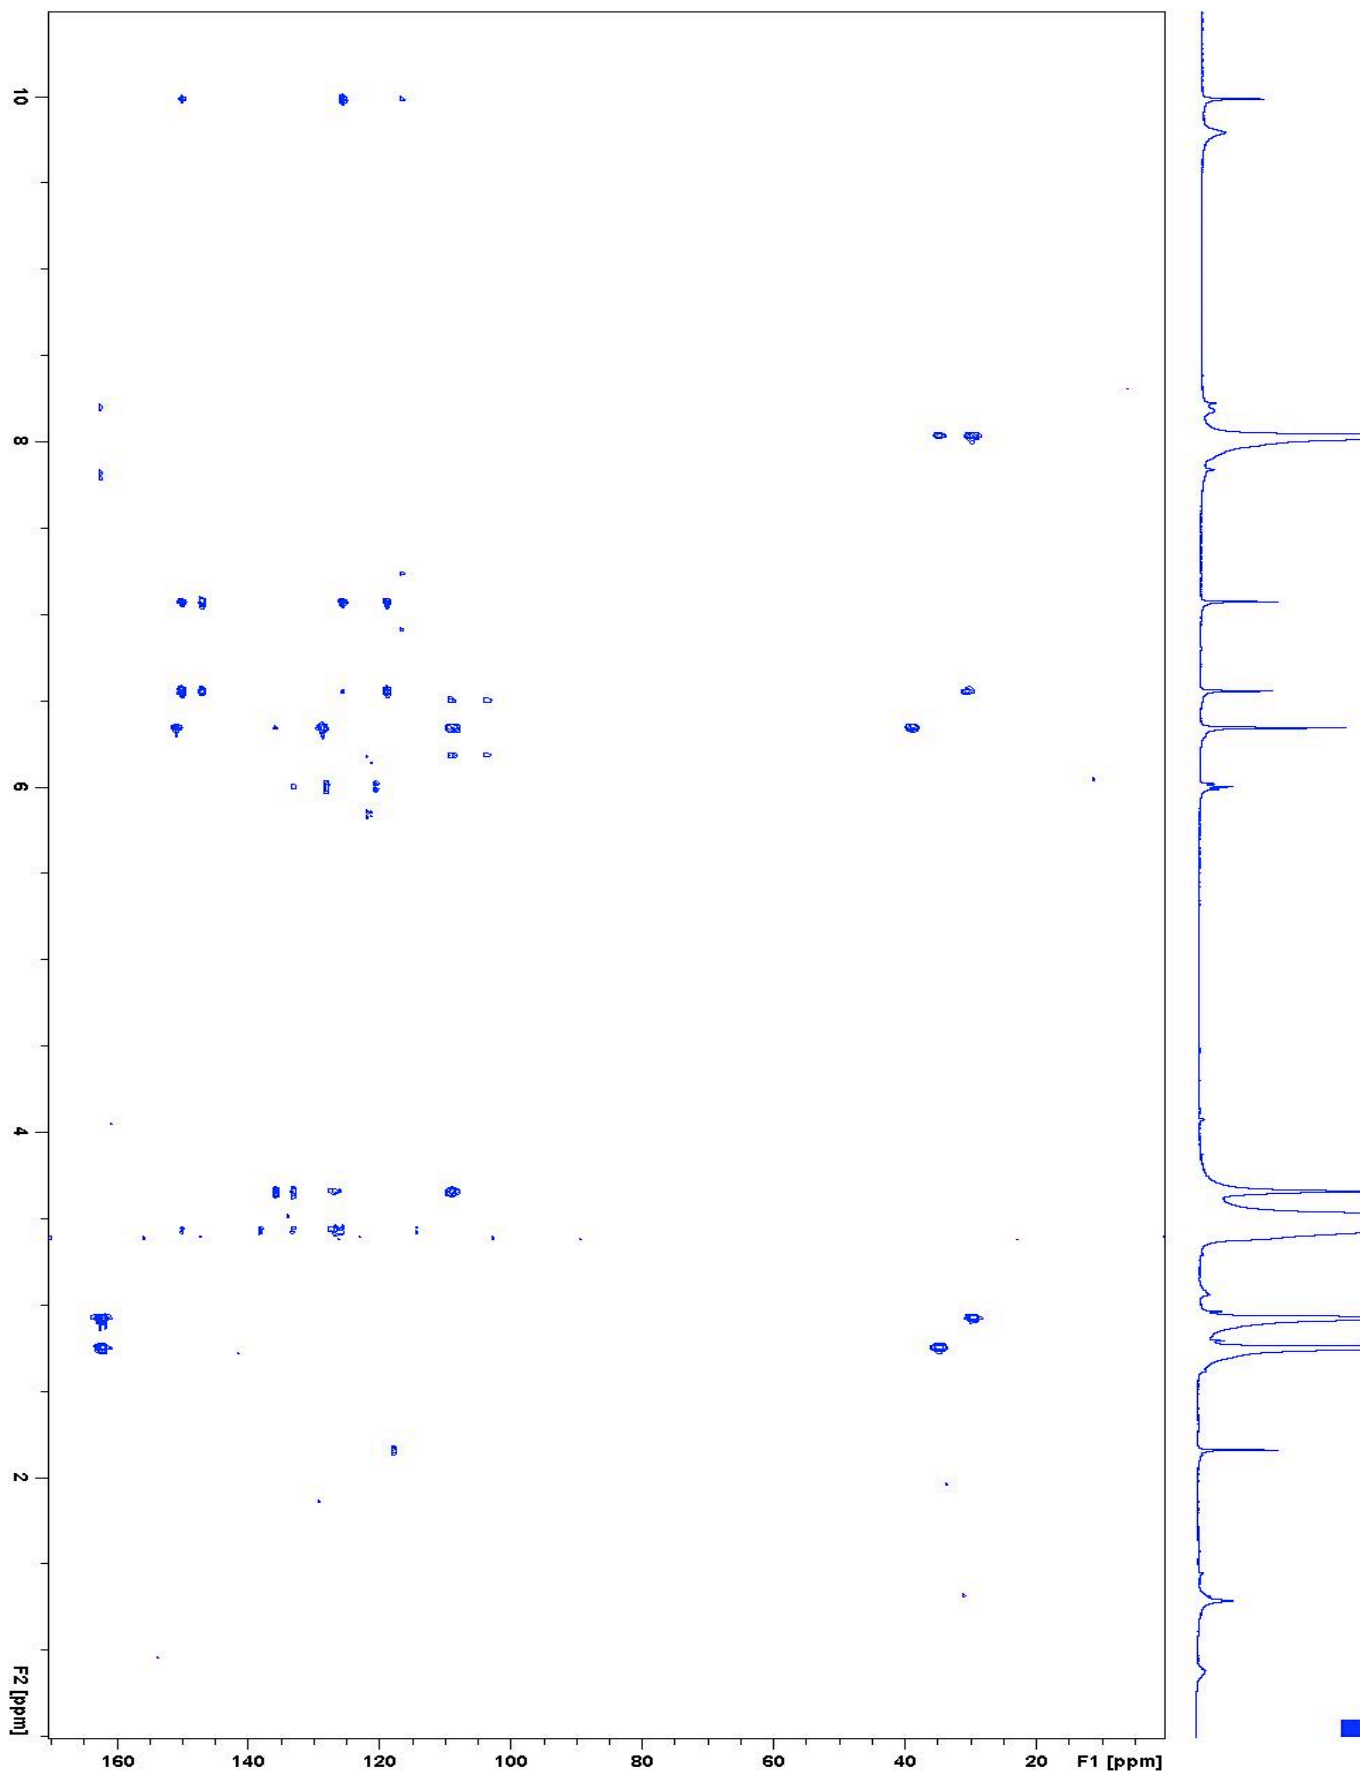

HMBC spectrum of chrysophentin F (6) in DMF-*d*<sub>7</sub>

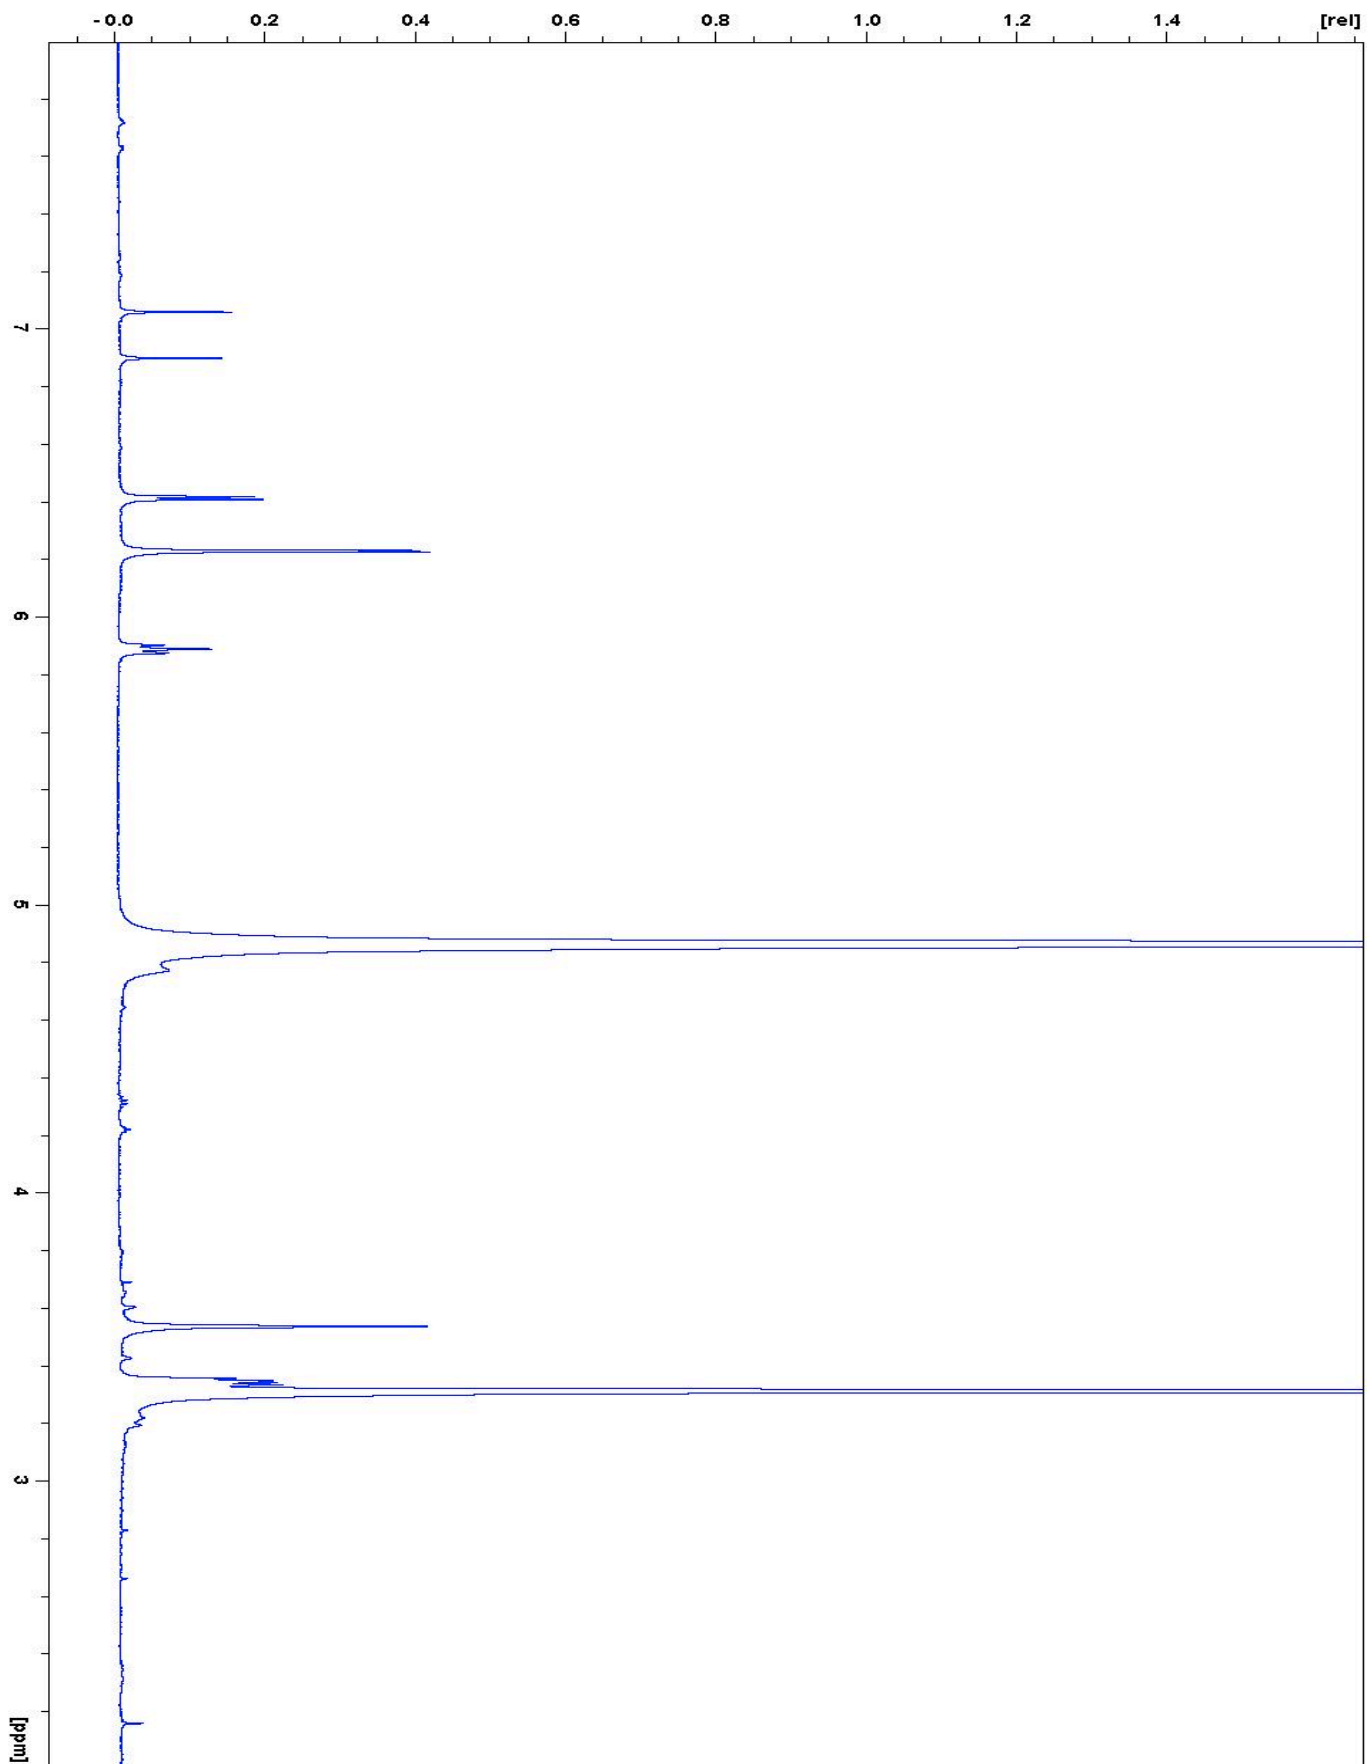

$^1\text{H}$  NMR spectrum of chrysophentin G (7) in  $\text{MeOD-}d_4$

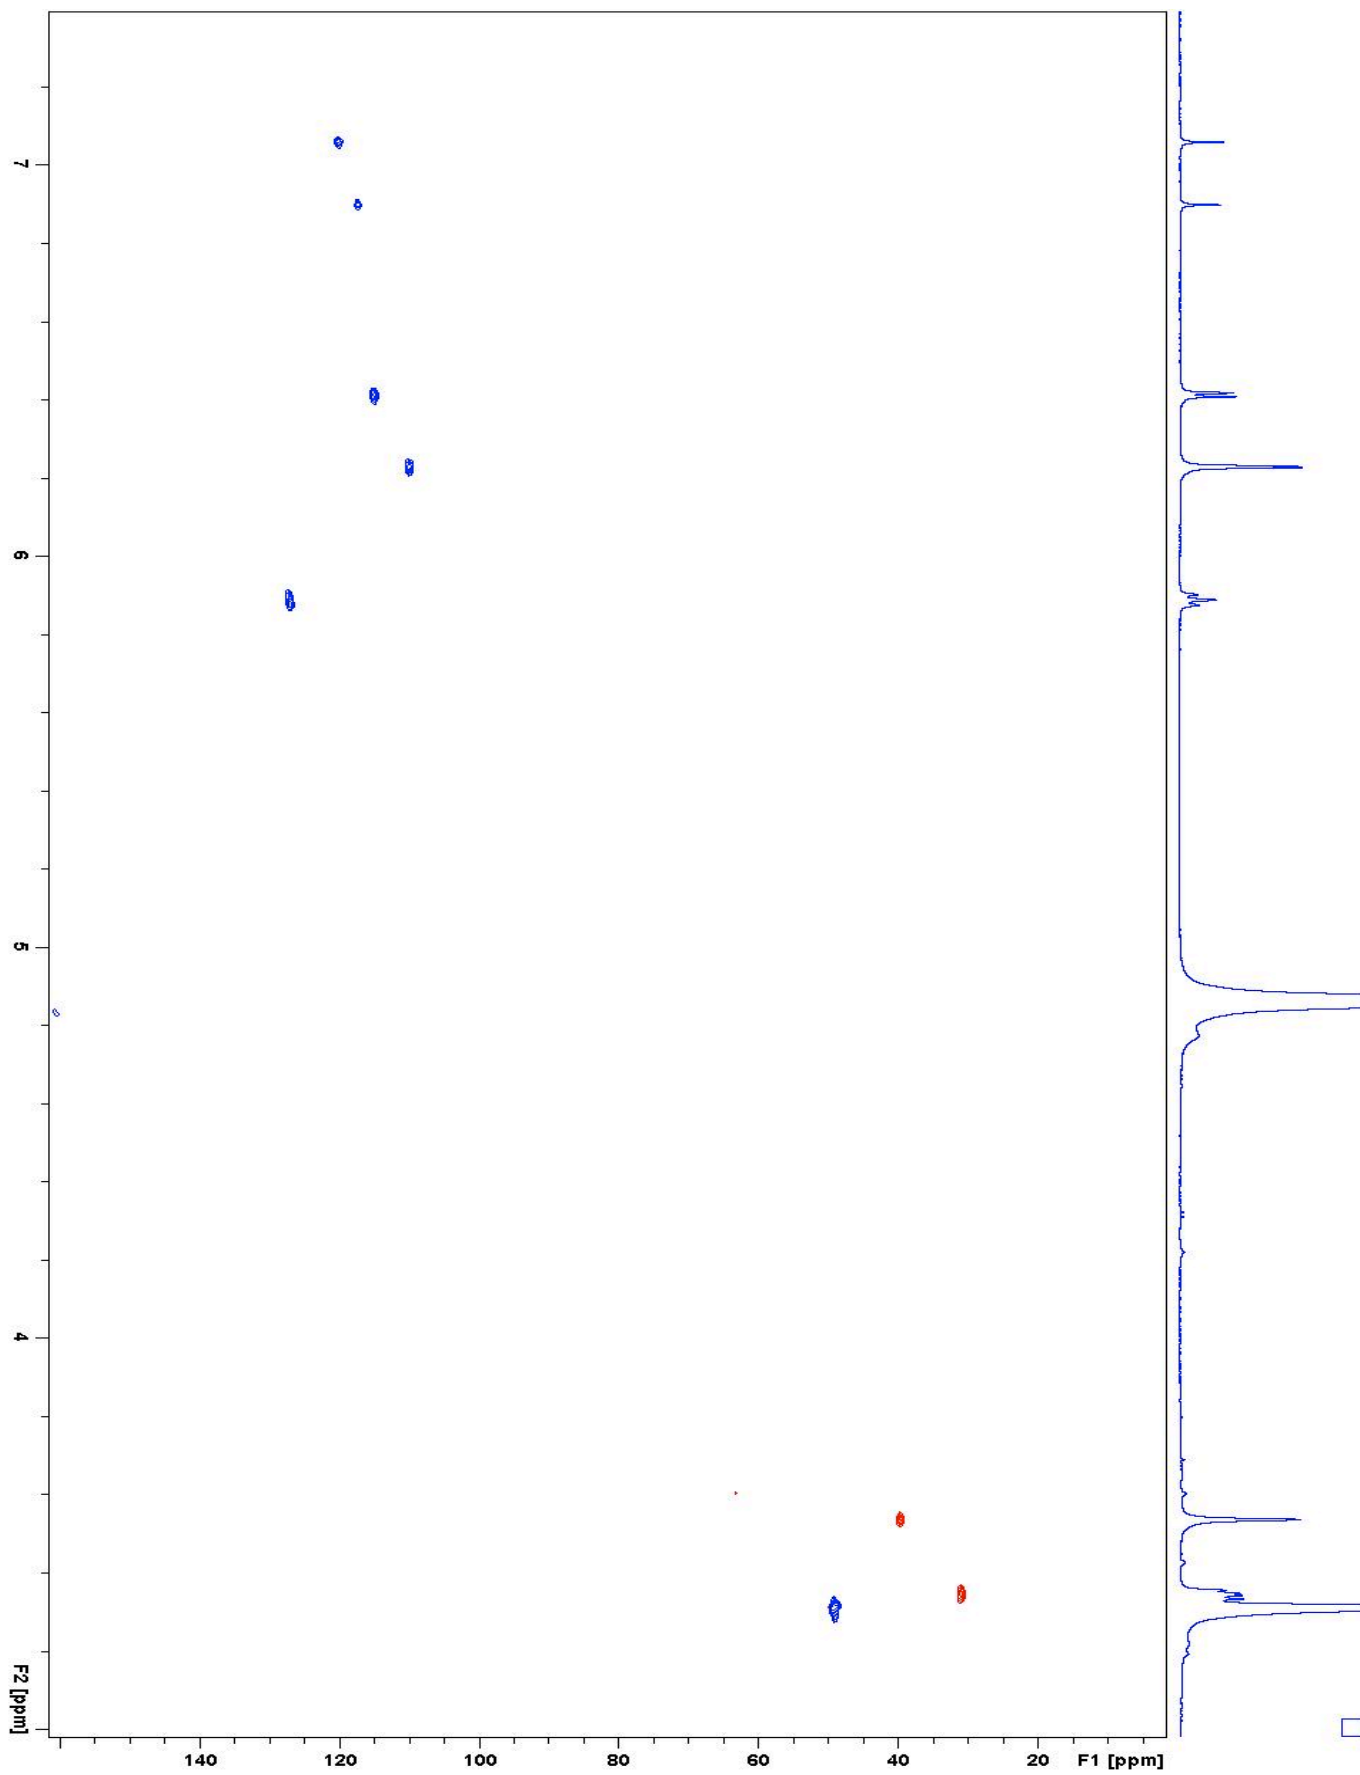

HSQC spectrum of chrysophentin G (7) in MeOD-*d*<sub>4</sub>

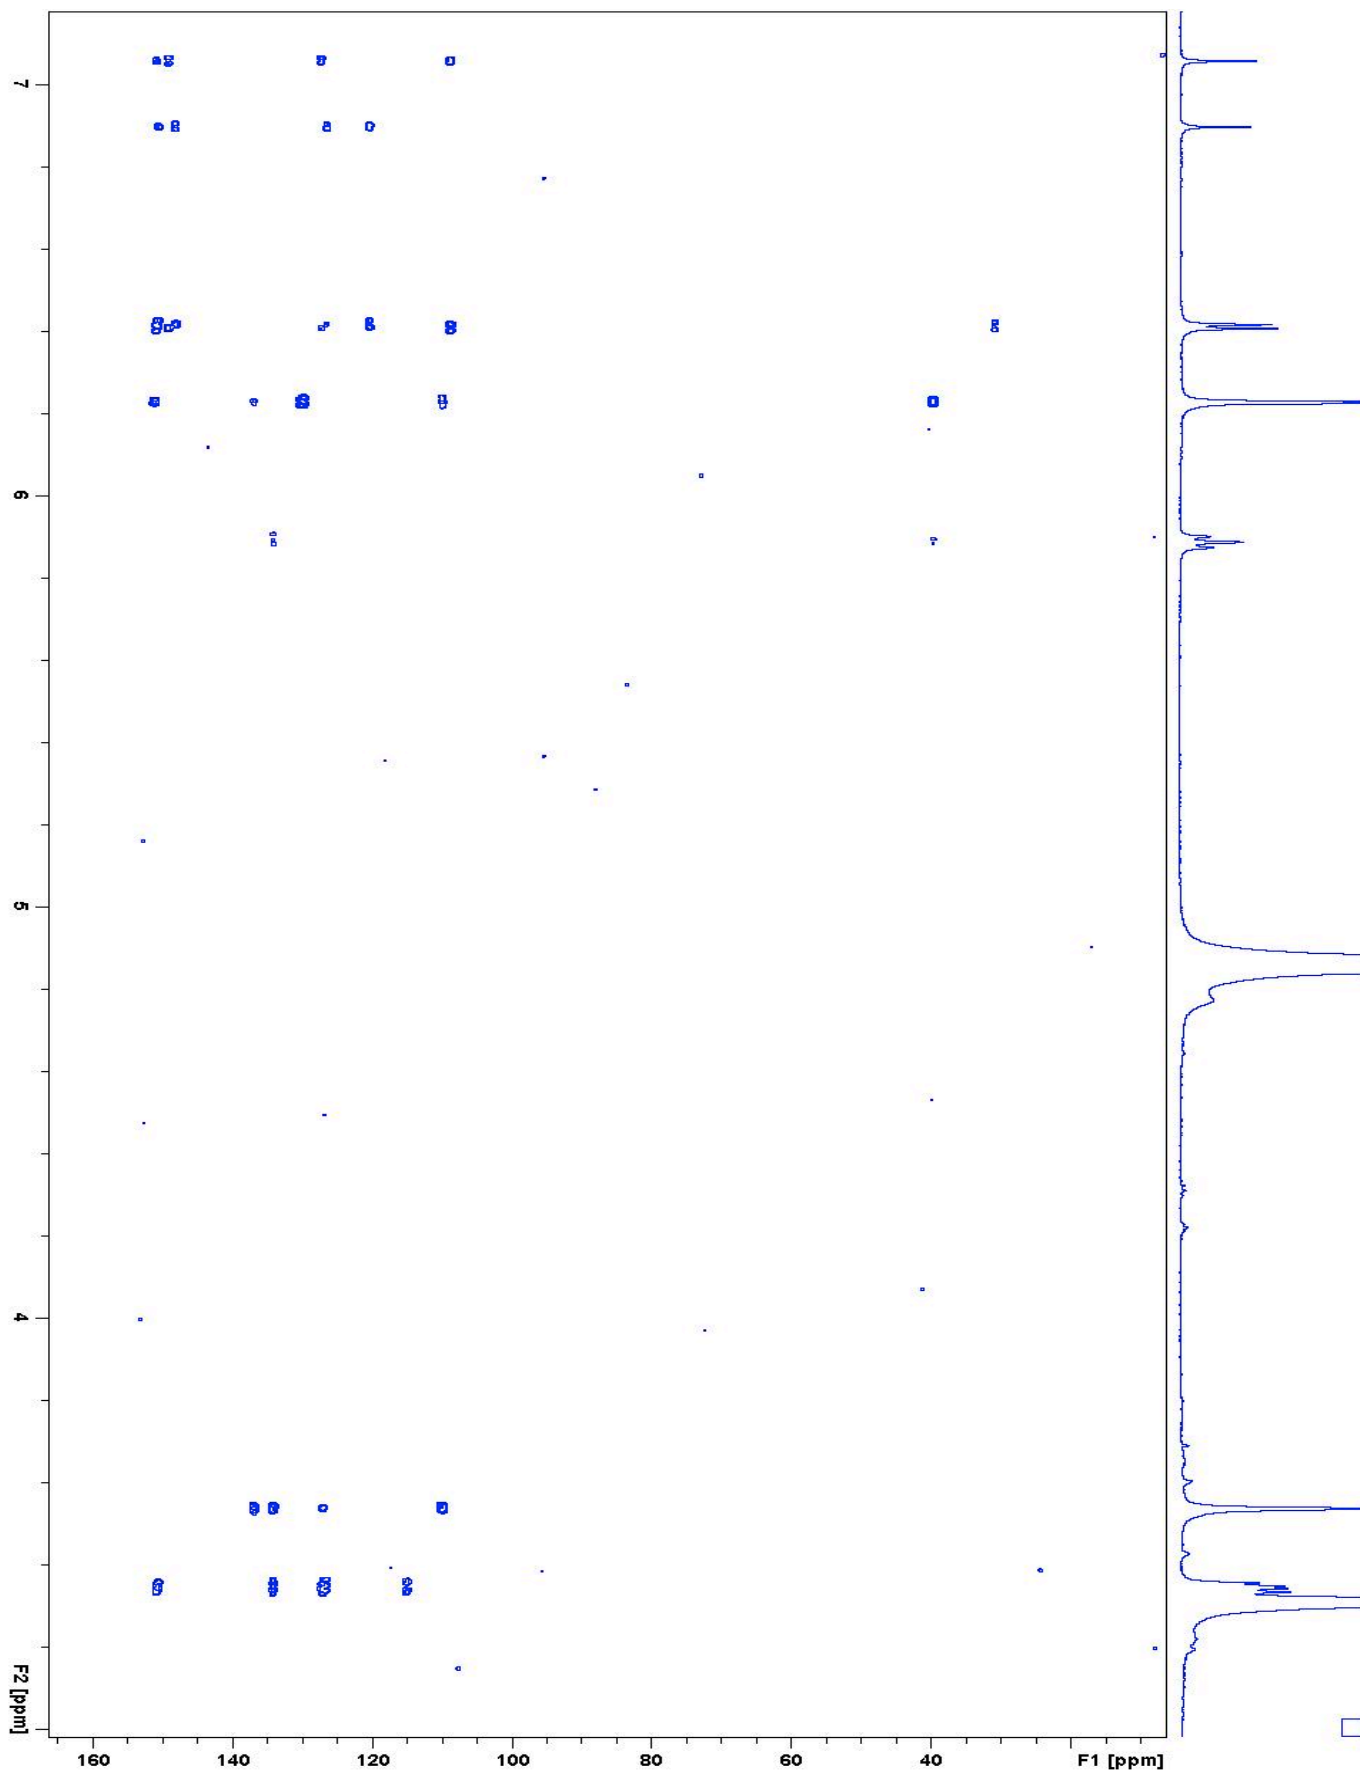

HMBC spectrum of chrysophentin G (7) in MeOD- $d_4$

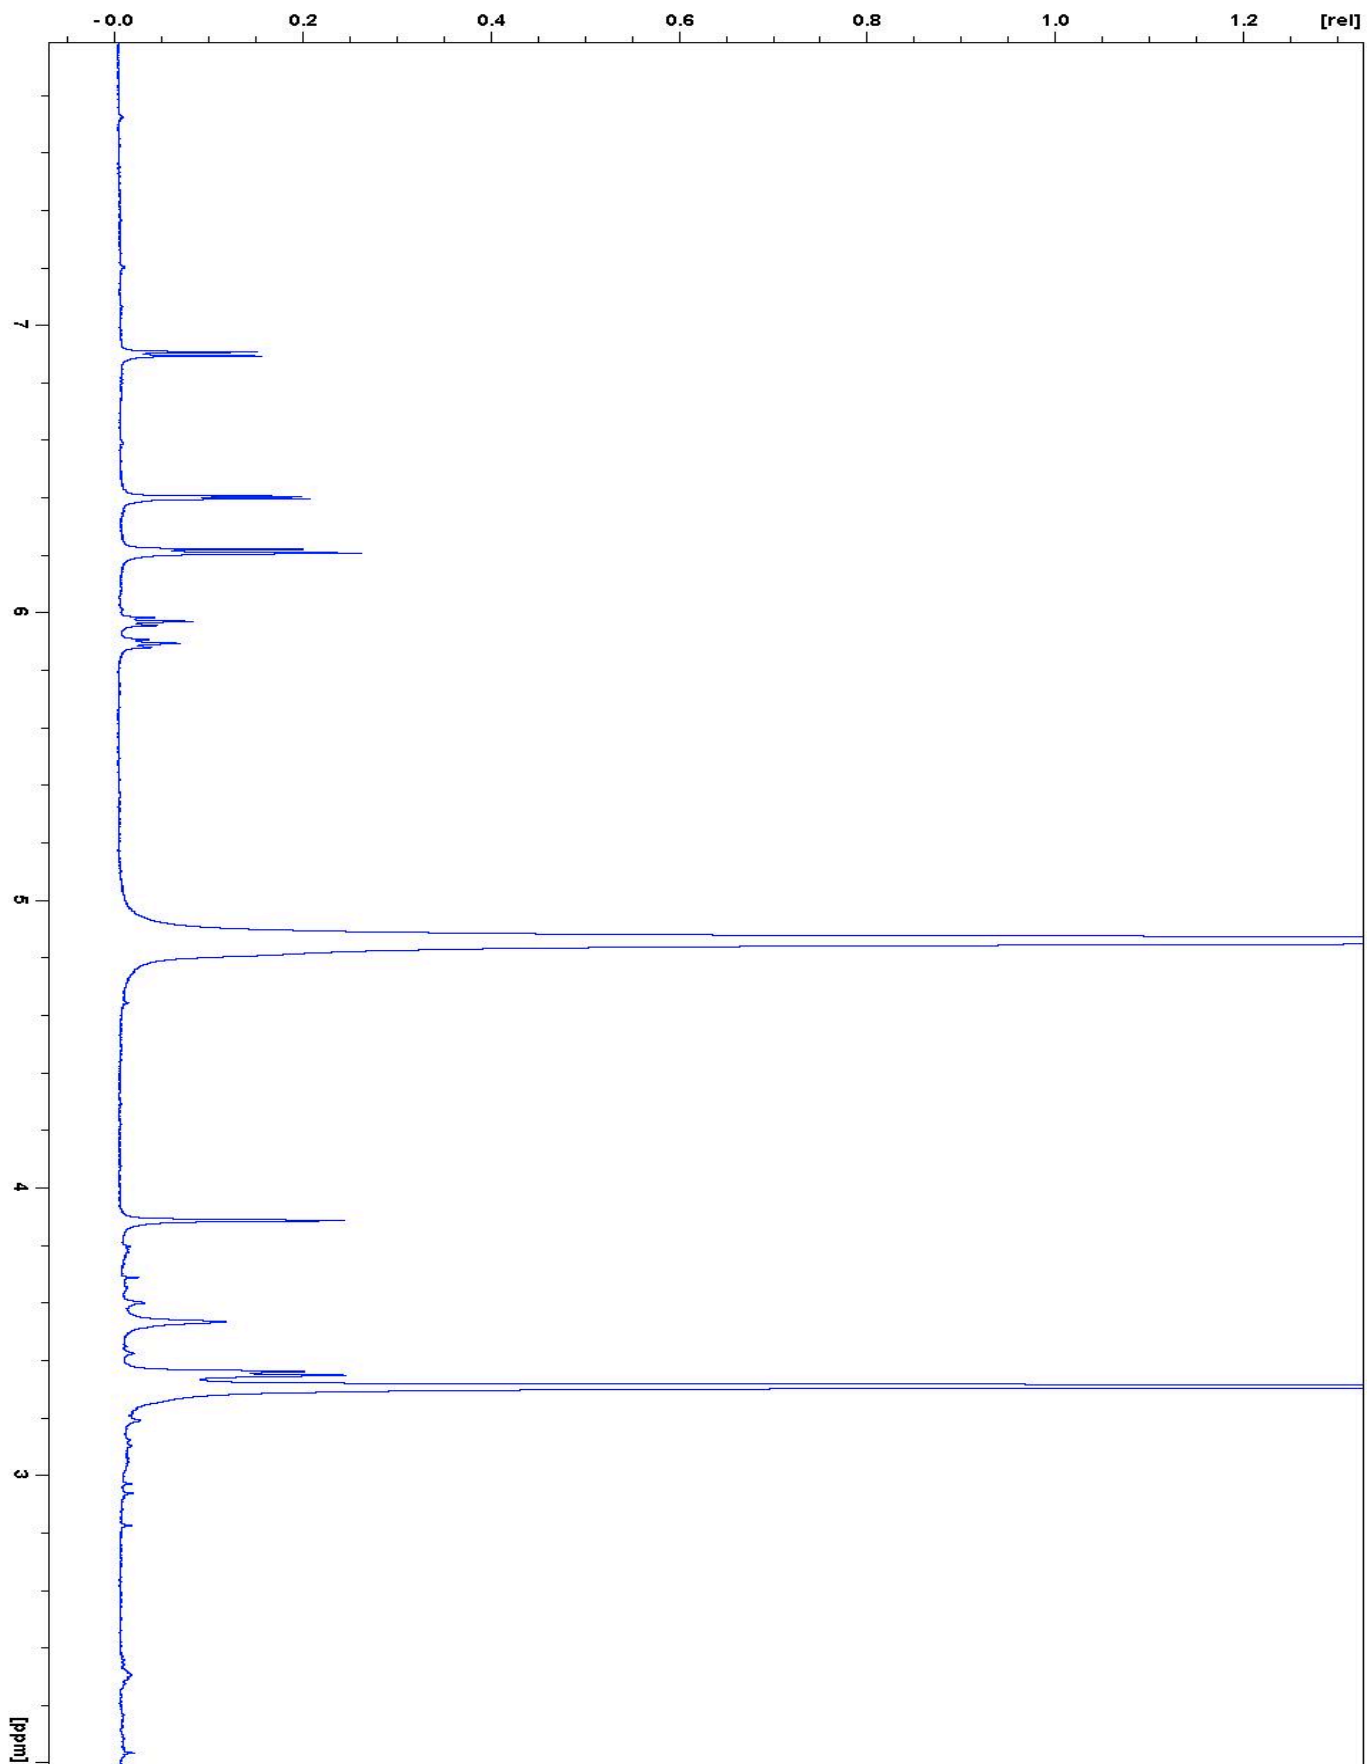

$^1\text{H}$  NMR spectrum of chrysophentin H (**8**) in  $\text{MeOD-}d_4$

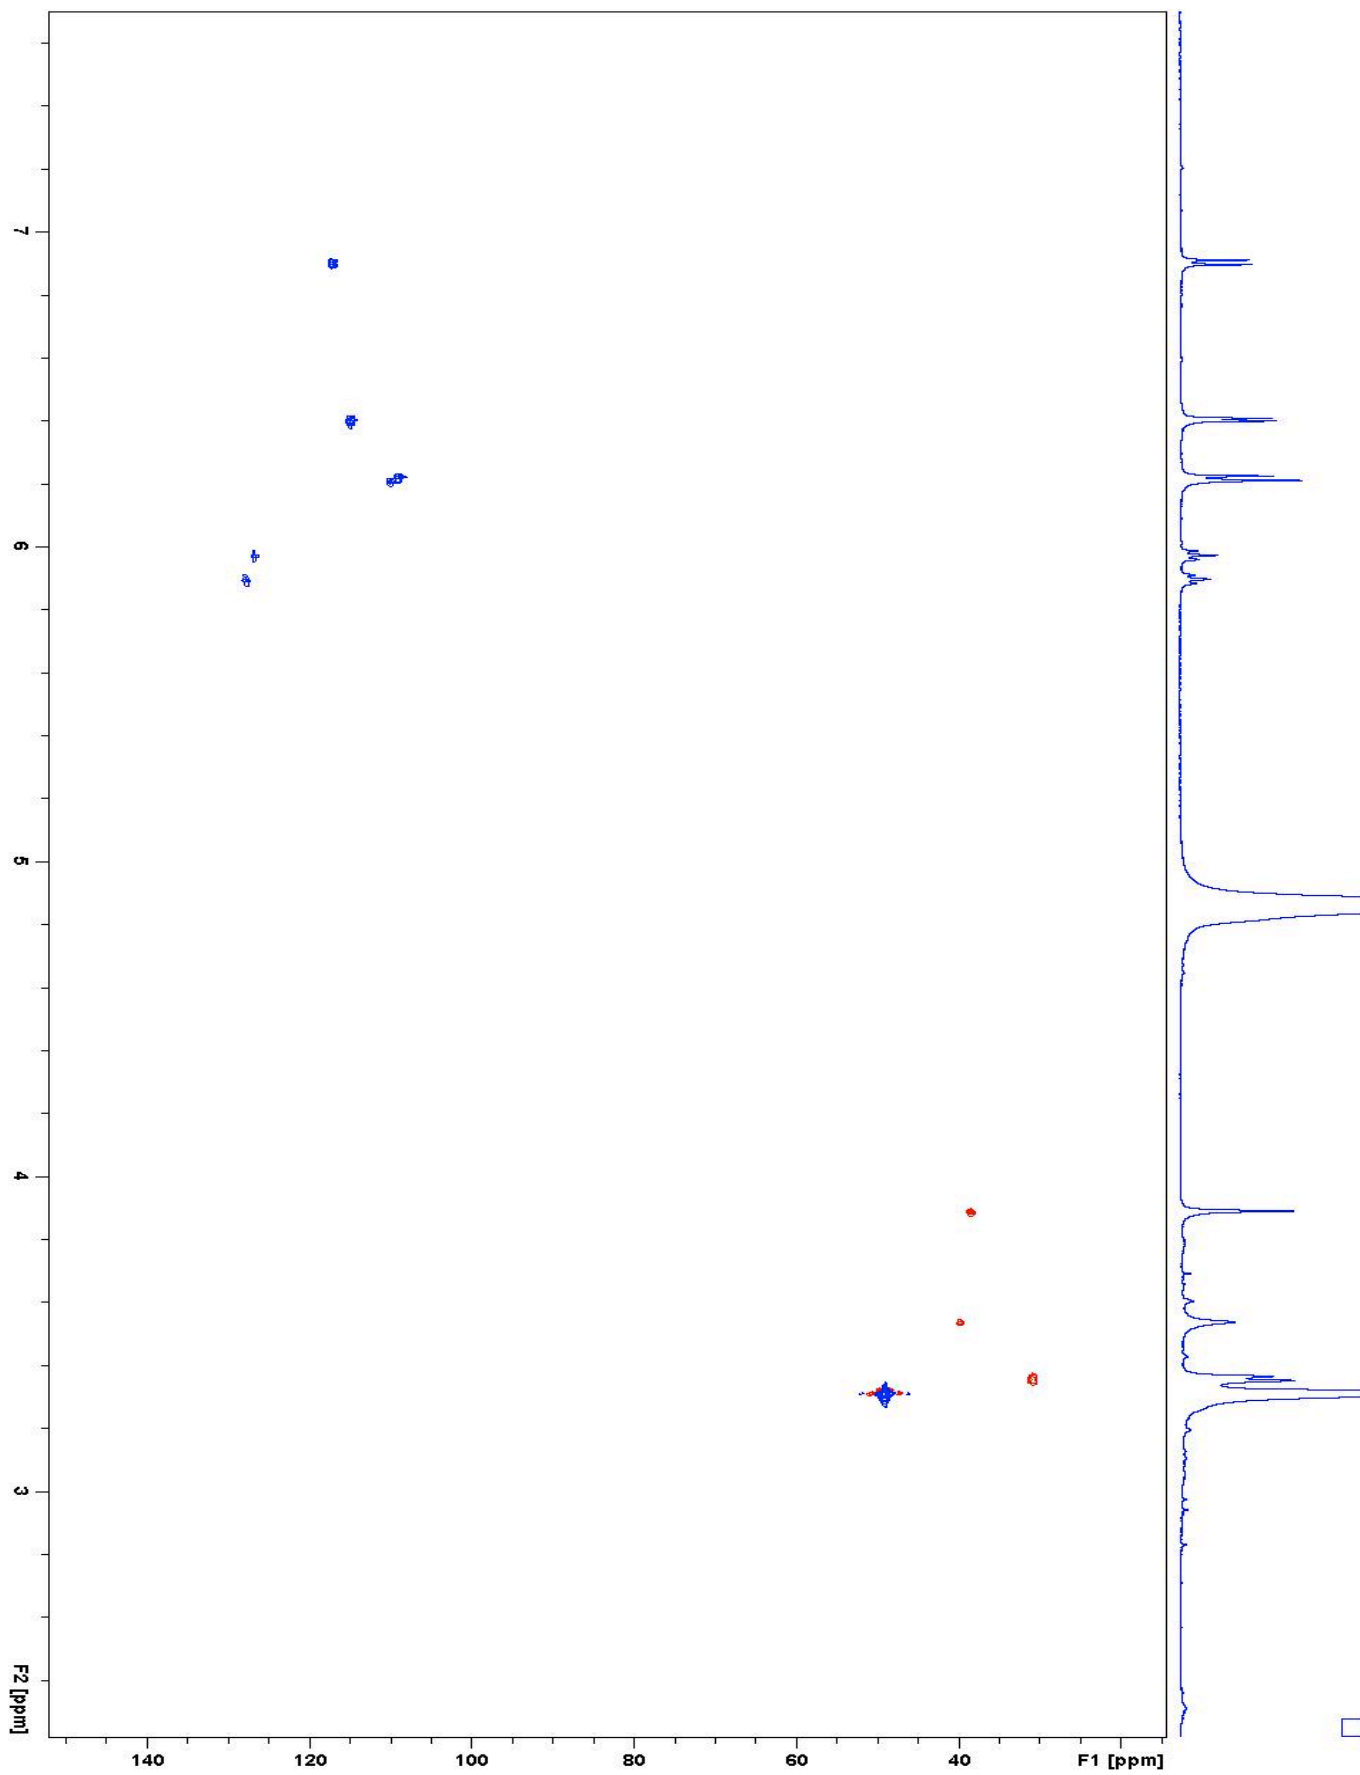

HSQC spectrum of chrysophentin H (**8**) in MeOD-*d*<sub>4</sub>



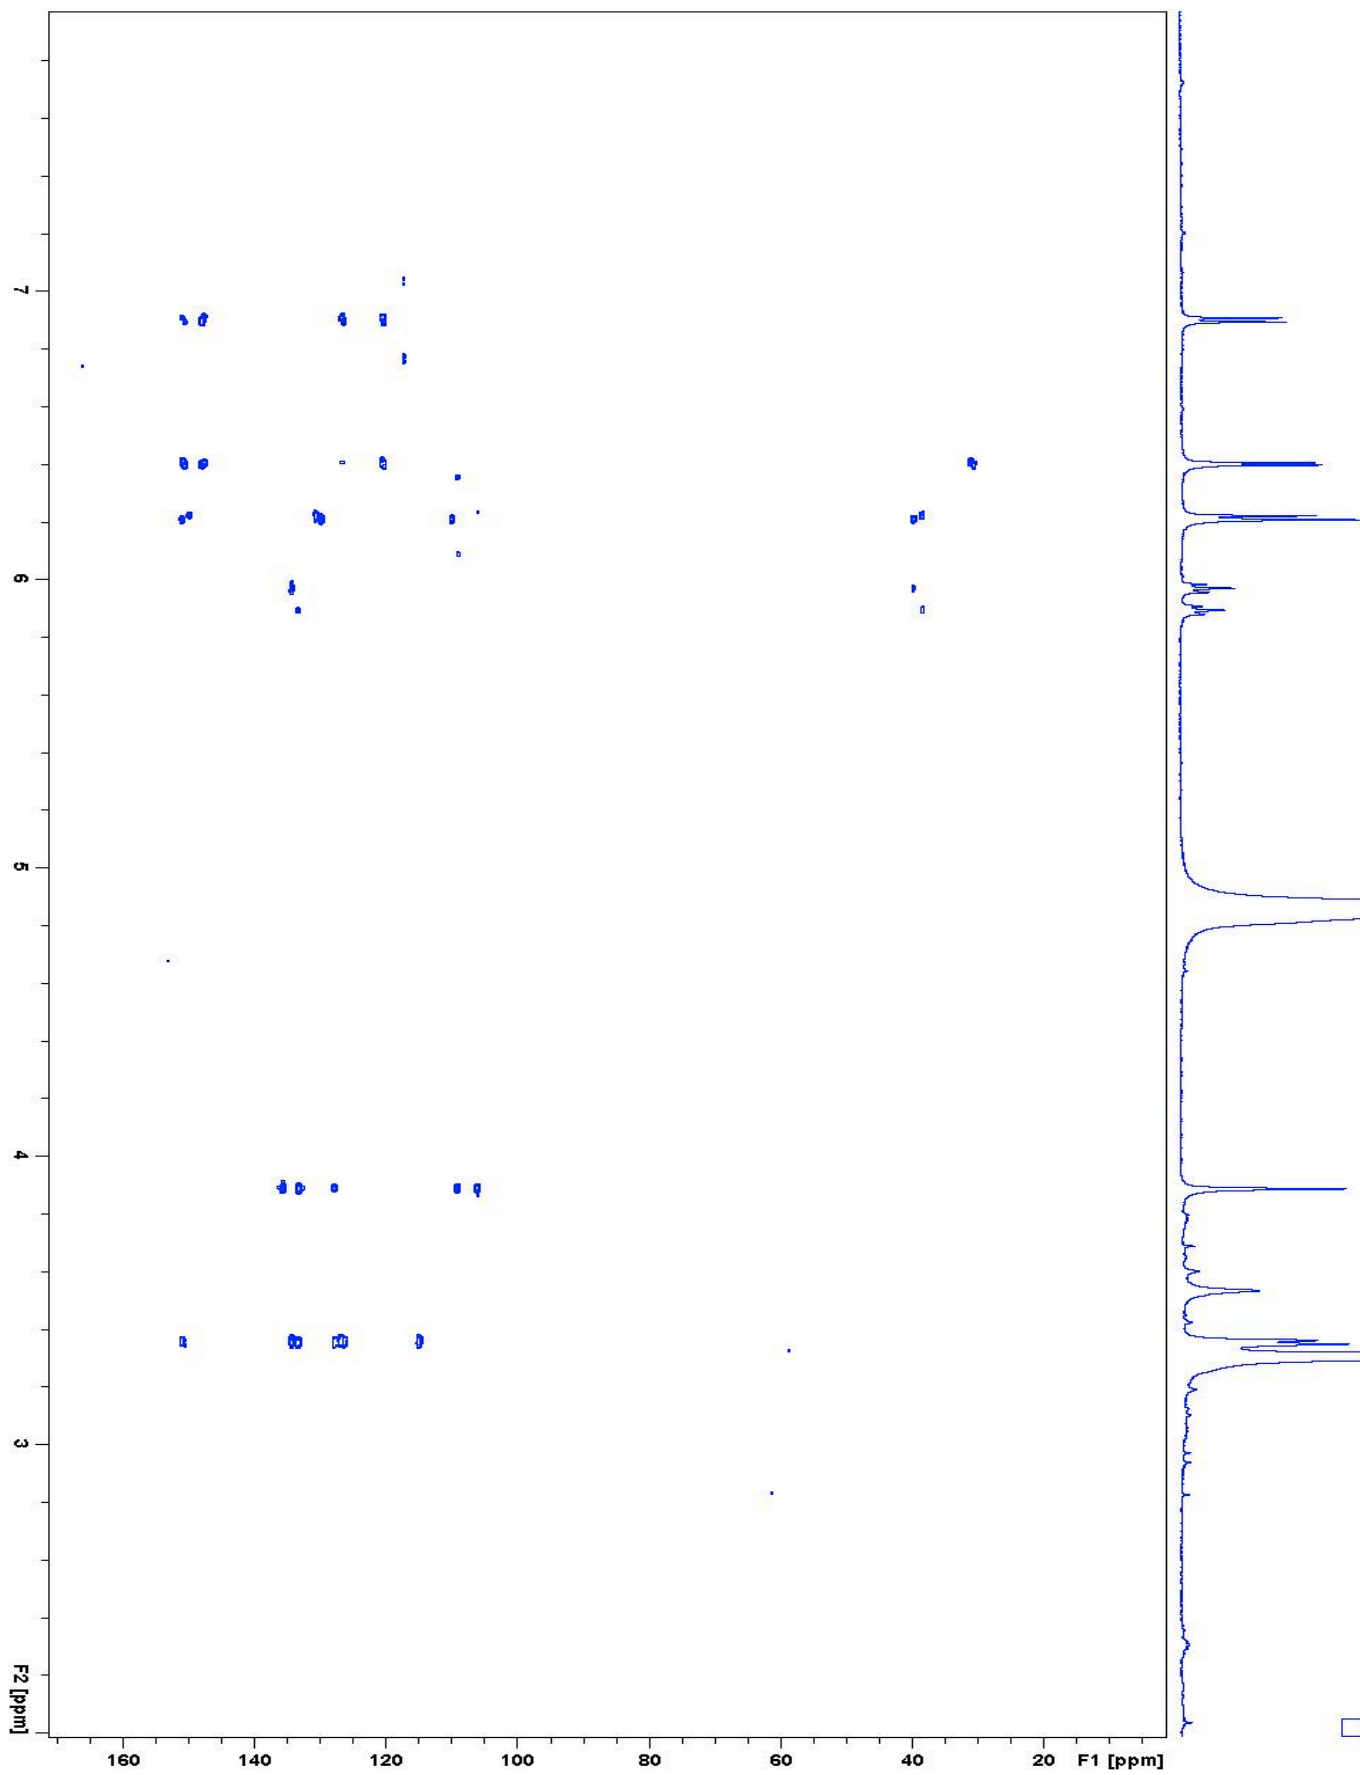

HMBC spectrum of chrysophentin H (**8**) in MeOD-*d*<sub>4</sub>

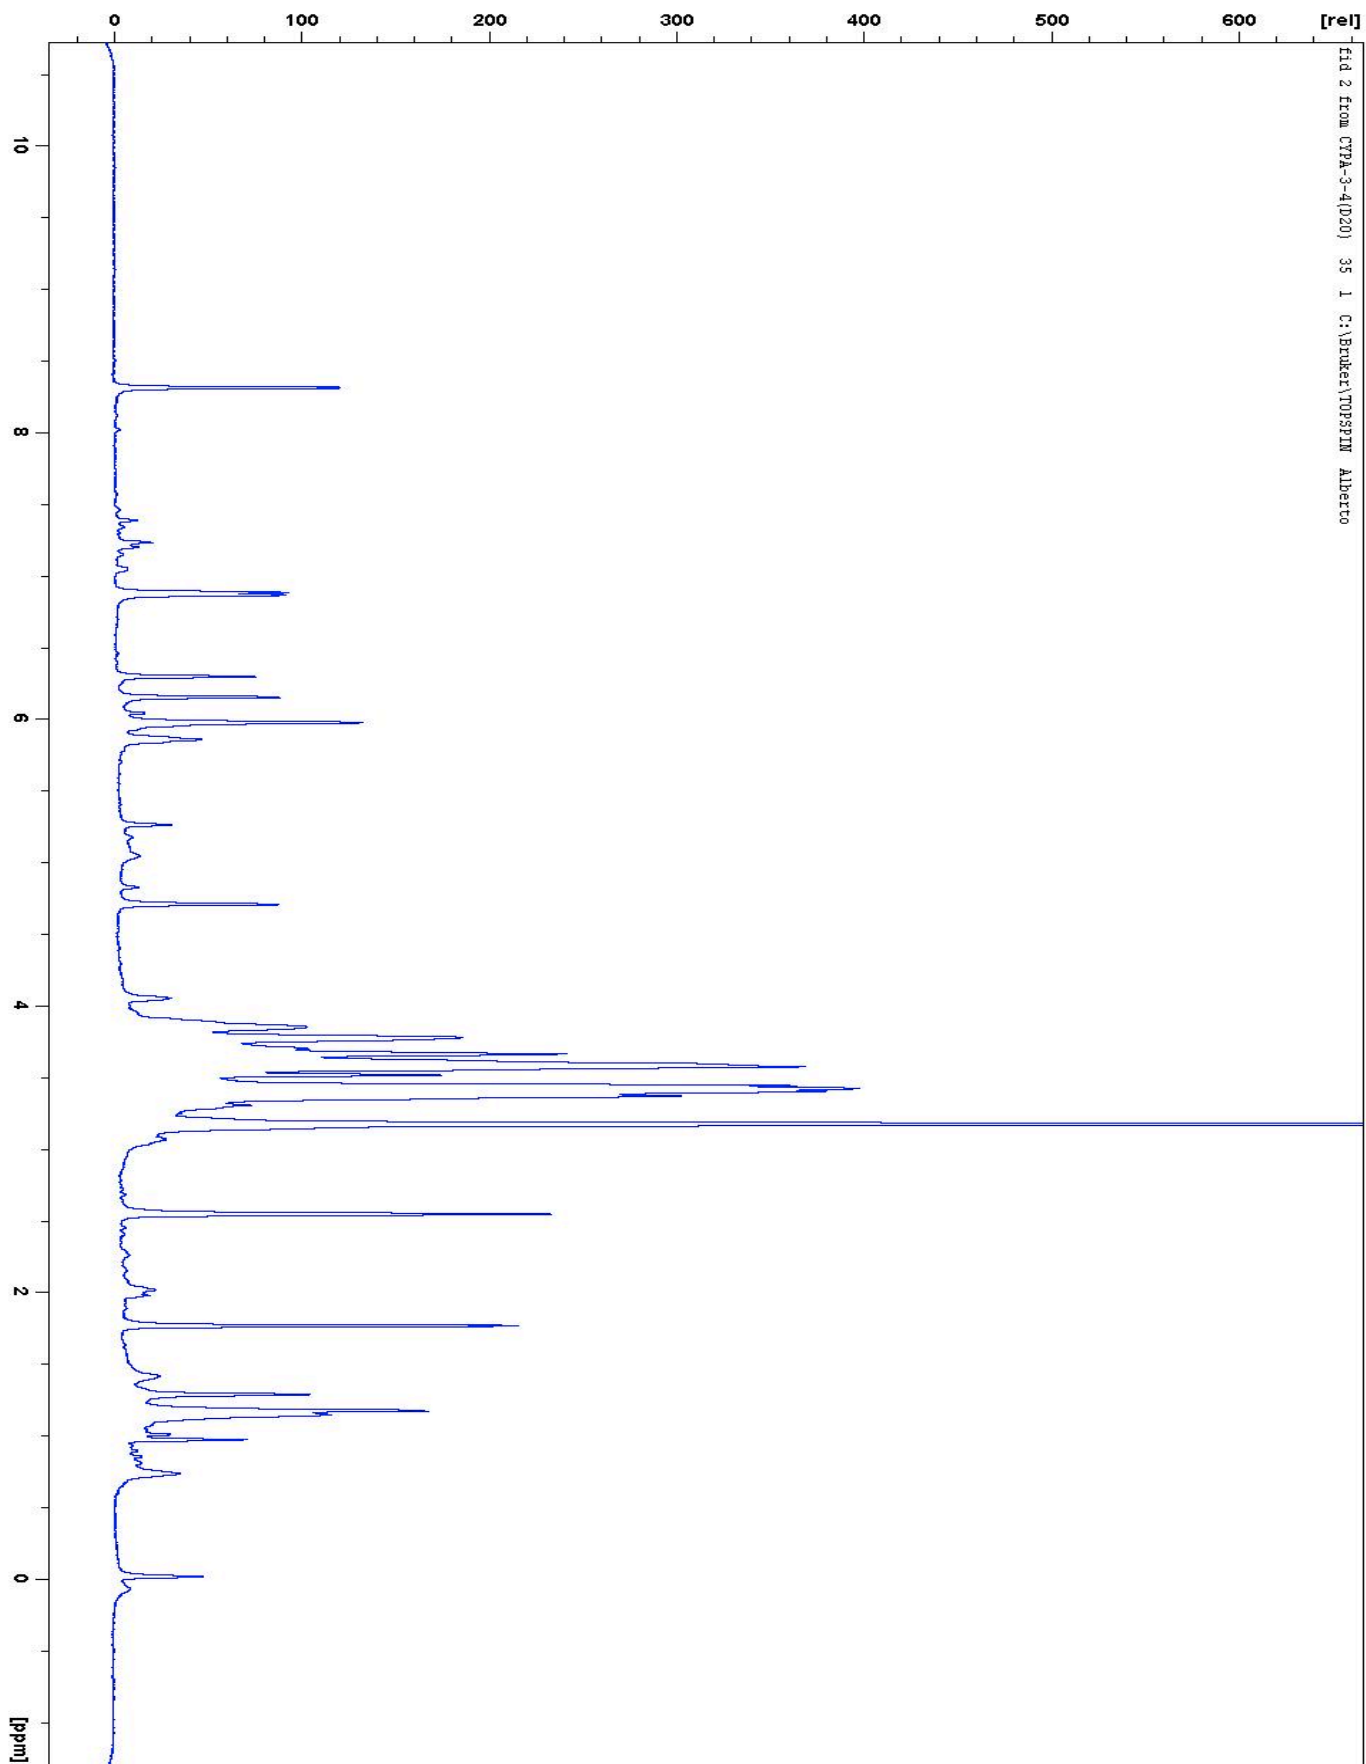

<sup>1</sup>H NMR Spectrum of complex chrysophentin A:FtsZ (100:1) in 20 mM NaPO<sub>4</sub>, 50 mM NaCl, pH 6.8

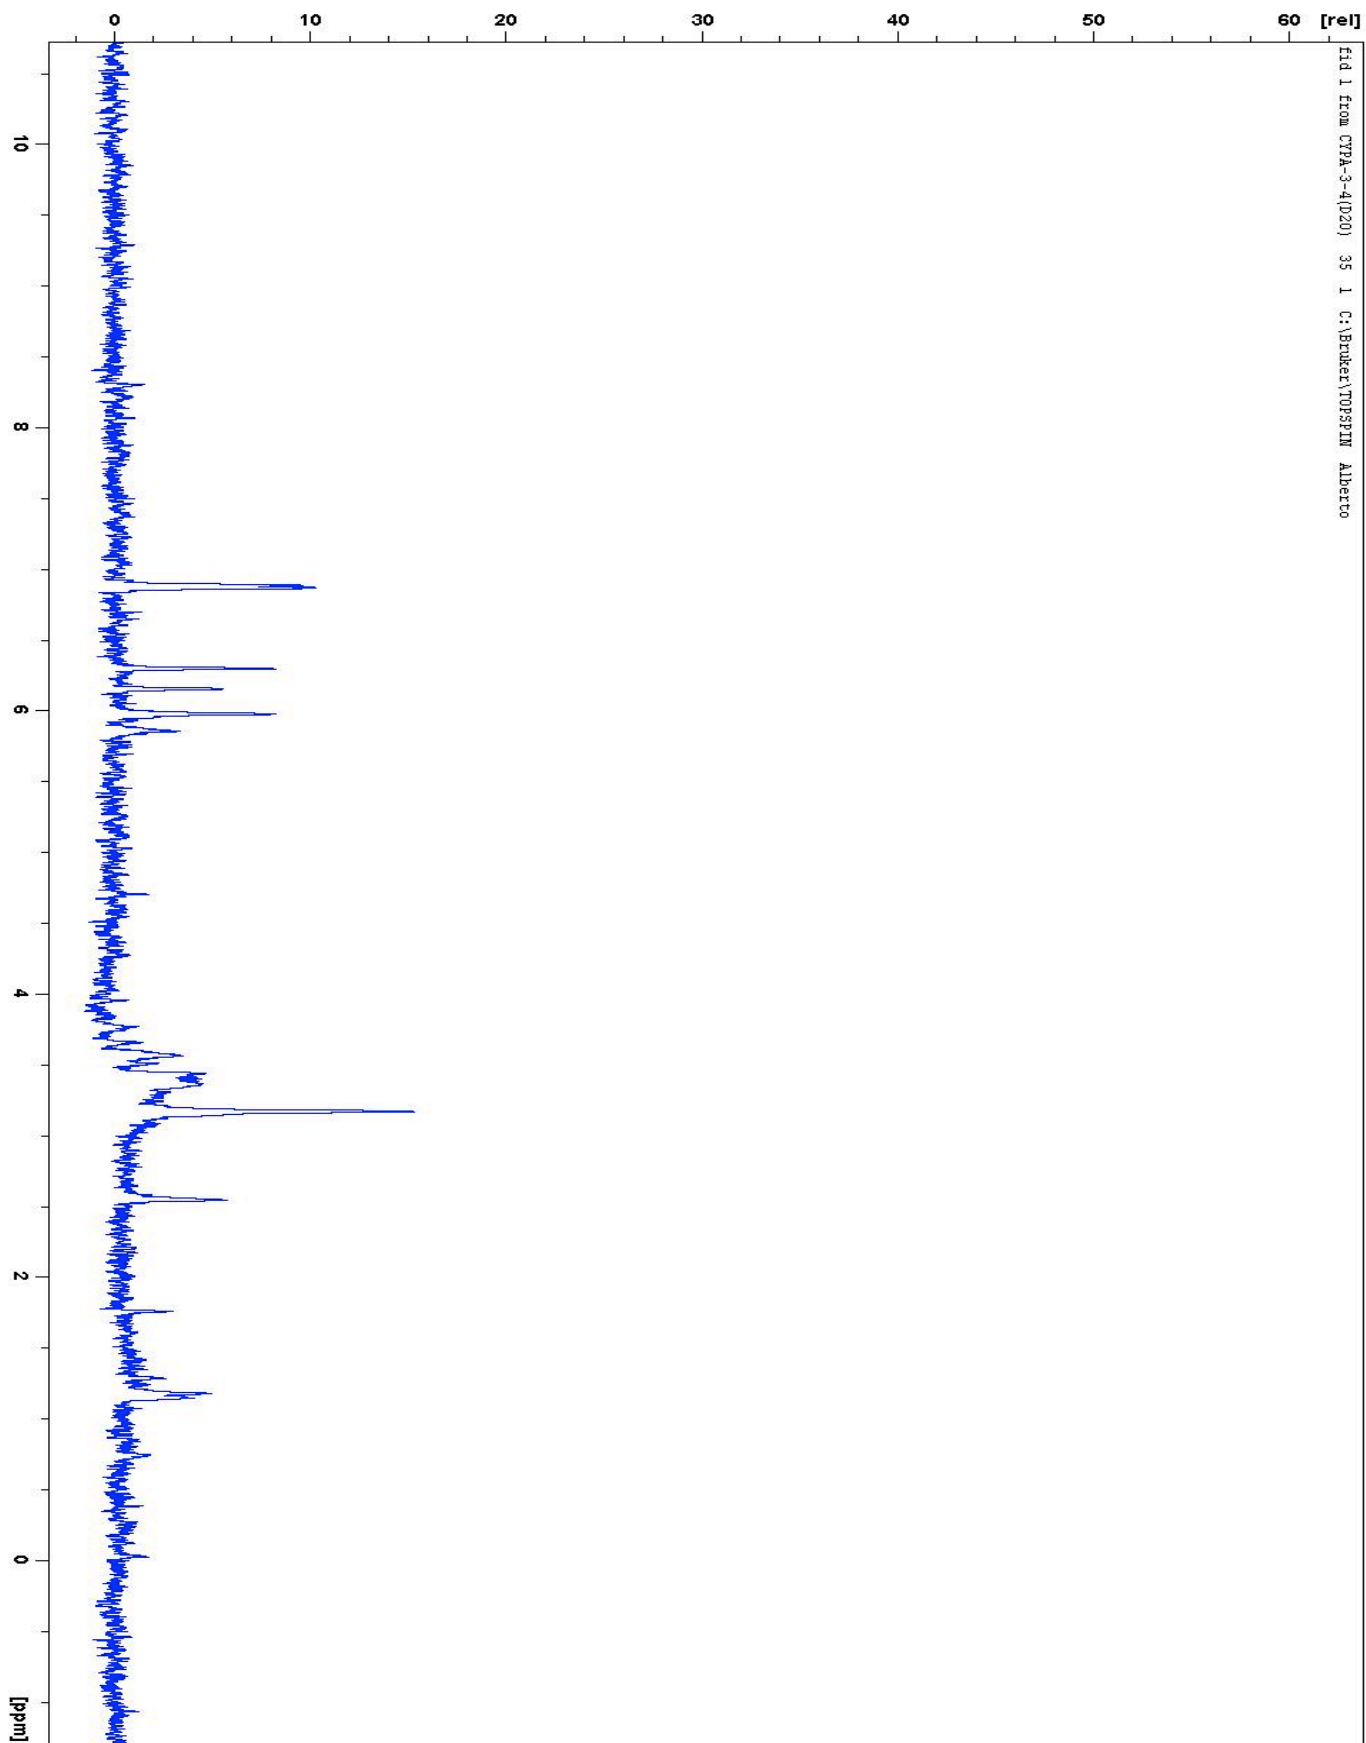

STD NMR Difference Spectrum of a complex of chrysophentins A:FtsZ (100:1) in 20 mM NaPO<sub>4</sub>, 50 mM NaCl, pH 6.8

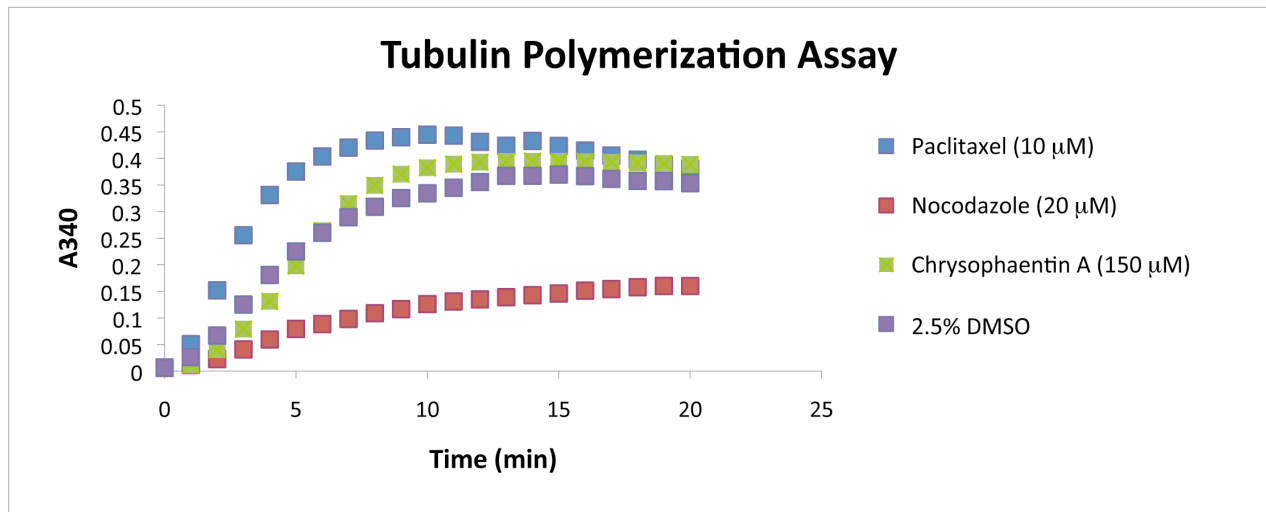

Tubulin polymerization assay. Known microtubule stabilizing (paclitaxel) and disrupting (nocodazole) agents were tested at standardized concentrations, together with chrysopaentin A at 150 μM, a concentration 15 times greater than its IC<sub>50</sub> value for inhibition of FtsZ. Chrysopaentin A was found to have no effect on tubulin polymerization.
